# Supplementary material
Source: PubMed Central journal article supplement (PMC5724766)
Supplement: NIHMS923051-supplement-supplemental.pdf [file NIHMS923051-supplement-supplemental.pdf]

# Supporting Information

## **Substituted Quinolines as Noncovalent Proteasome Inhibitors**

Tanner J. McDaniel, Theresa A. Lansdell, Amila A. Dissanayake, Lauren Azevedo, Jacob Claes, Aaron L. Odom\* and Jetze J. Tepe\*

*\*Department of Chemistry, Michigan State University, 578 S. Shaw Ln, East Lansing, MI 48824*

# Supporting Information

## Table of Contents

|                                                                                                       |         |
|-------------------------------------------------------------------------------------------------------|---------|
| <b>Fluorescence Quenching Control</b> .....                                                           | S3      |
| <b>Inhibition of NF-<math>\kappa</math>B-luc activity</b> .....                                       | S3      |
| <b>Inhibition of chymotryptic-like activity by quinolines 1-38</b> .....                              | S4-S8   |
| <b>Figure S1: Quinolines 1-8</b> .....                                                                | S4      |
| <b>Figure S2: Quinolines 9-16</b> .....                                                               | S5      |
| <b>Figure S3: Quinolines 17-24</b> .....                                                              | S6      |
| <b>Figure S4: Quinolines 25-32</b> .....                                                              | S7      |
| <b>Figure S4: Quinolines 33-38</b> .....                                                              | S8      |
| <b>Statistical analysis for the inhibition of chymotryptic-like activity by quinolines 1-38</b> ..... | S9-S16  |
| <b>Table S1: Quinolines 1-5</b> .....                                                                 | S9      |
| <b>Table S2: Quinolines 6-10</b> .....                                                                | S10     |
| <b>Table S3: Quinolines 11-15</b> .....                                                               | S11     |
| <b>Table S4: Quinolines 16-20</b> .....                                                               | S12     |
| <b>Table S5: Quinolines 21-25</b> .....                                                               | S13     |
| <b>Table S6: Quinolines 26-30</b> .....                                                               | S14     |
| <b>Table S7: Quinolines 31-35</b> .....                                                               | S15     |
| <b>Table S8: Quinolines 36-38</b> .....                                                               | S16     |
| <b>Table S9: Quinoline 25 substrate selectivity</b> .....                                             | S17     |
| <b>Table S10: Kinetic analysis of quinoline 7 inhibition of purified 20S proteasome</b> .....         | S18     |
| <b><math>^1\text{H}</math> and <math>^{13}\text{C}</math> NMR for Quinolines 1-38</b> .....           | S19-S80 |
| <b>Crystal structure for 6-bromo-3-phenyl-2-methylquinoline (TM127)</b> .....                         | S81     |

## Fluorescence Quenching Control

During the measurements of 20S proteasomal activity using Suc-LLVY-AMC as the fluorogenic substrate, a fluorescence quenching control was run simultaneously with these experiments; one row of the 96 well plate was designated for this control. A buffer solution of 50 mM Tris-HCl pH 7.5 with 0.03% SDS was prepared. The test wells contained 100  $\mu$ L total volume consisting of: 1 nM of purified human 20S proteasome, 50  $\mu$ M of quinoline and buffer solution. Monitoring was done at 37 °C using a SpectraMax M5e multiwell plate reader at an excitation wavelength of 380 nm and emission wavelength of 460 nm to detect any fluorescence quenching stemming from the quinoline/label interactions. No interference was observed for any of the samples with the exception of **TM-124 (quinoline #35)**. **TM-124** exhibited fluorescence quenching, which lead to the perception that the quinoline inhibited the proteasome with an  $IC_{50}$   $\sim$ 2.3  $\mu$ M. The compound must not be as active as the measurement implies. Considering **TM-124** is similar in structure to **TM-080**, which is inactive, we assumed **TM-124** is also inactive.

## Inhibition of NF- $\kappa$ B-luc activity

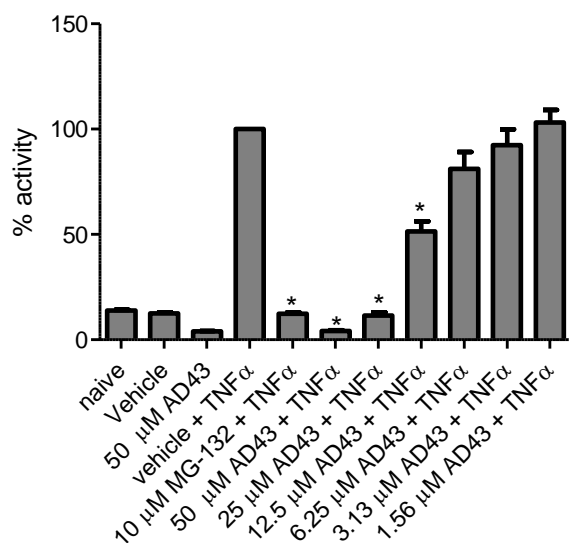

| log(inhibitor) vs. response --<br>Variable slope (four parameters) |                  |
|--------------------------------------------------------------------|------------------|
| <b>Best-fit values</b>                                             |                  |
| Bottom                                                             | = 0.0            |
| Top                                                                | = 100.0          |
| LogIC <sub>50</sub>                                                | 1.084            |
| HillSlope                                                          | -2.373           |
| IC <sub>50</sub>                                                   | 12.12            |
| Span                                                               | = 100.0          |
| Std. Error                                                         |                  |
| LogIC <sub>50</sub>                                                | 0.02998          |
| HillSlope                                                          | 0.3480           |
| <b>95% Confidence Intervals</b>                                    |                  |
| LogIC <sub>50</sub>                                                | 1.021 to 1.146   |
| HillSlope                                                          | -3.095 to -1.652 |
| IC <sub>50</sub>                                                   | 10.51 to 13.99   |
| <b>Goodness of Fit</b>                                             |                  |
| Degrees of Freedom                                                 | 22               |
| R square                                                           | 0.9361           |
| Absolute Sum of Squares                                            | 2402             |
| Standard Deviation of Residuals                                    | 10.45            |
| <b>Constraints</b>                                                 |                  |
| Bottom                                                             | Bottom = 0.0     |
| Top                                                                | Top = 100.0      |
| <b>Number of points</b>                                            |                  |
| Analyzed                                                           | 24               |

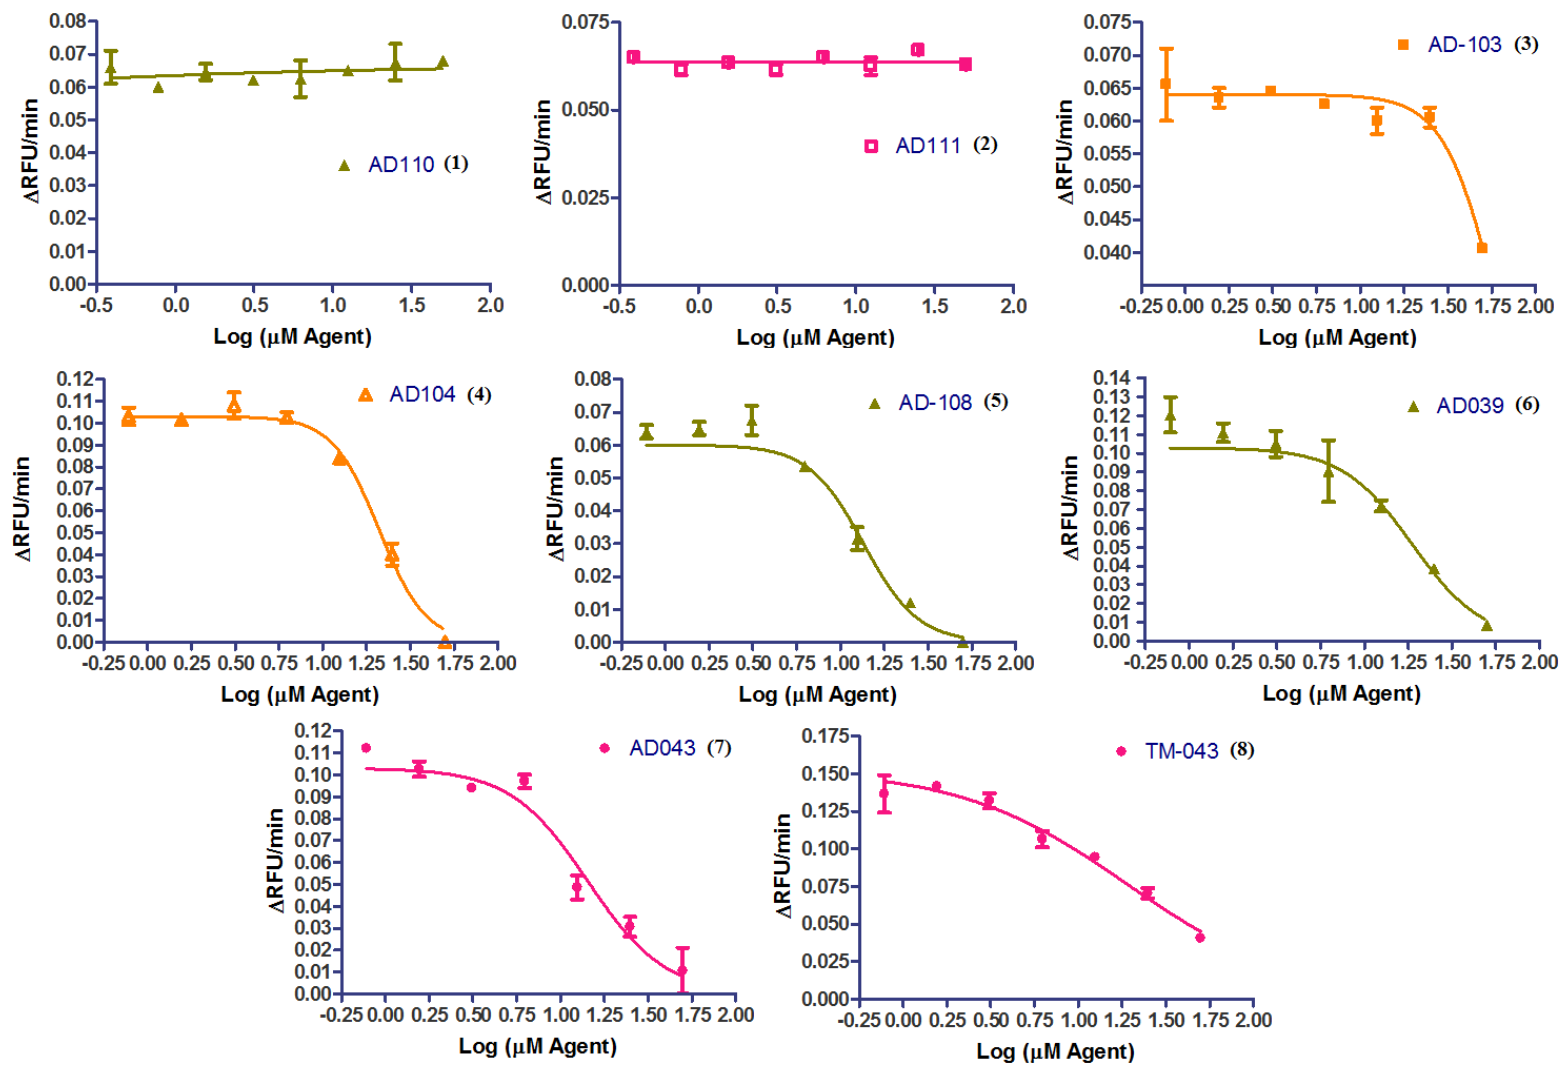

**Figure S1:** The inhibition of chymotryptic-like activity of purified human 20S proteasome.  
(Quinolines 1 to 8)

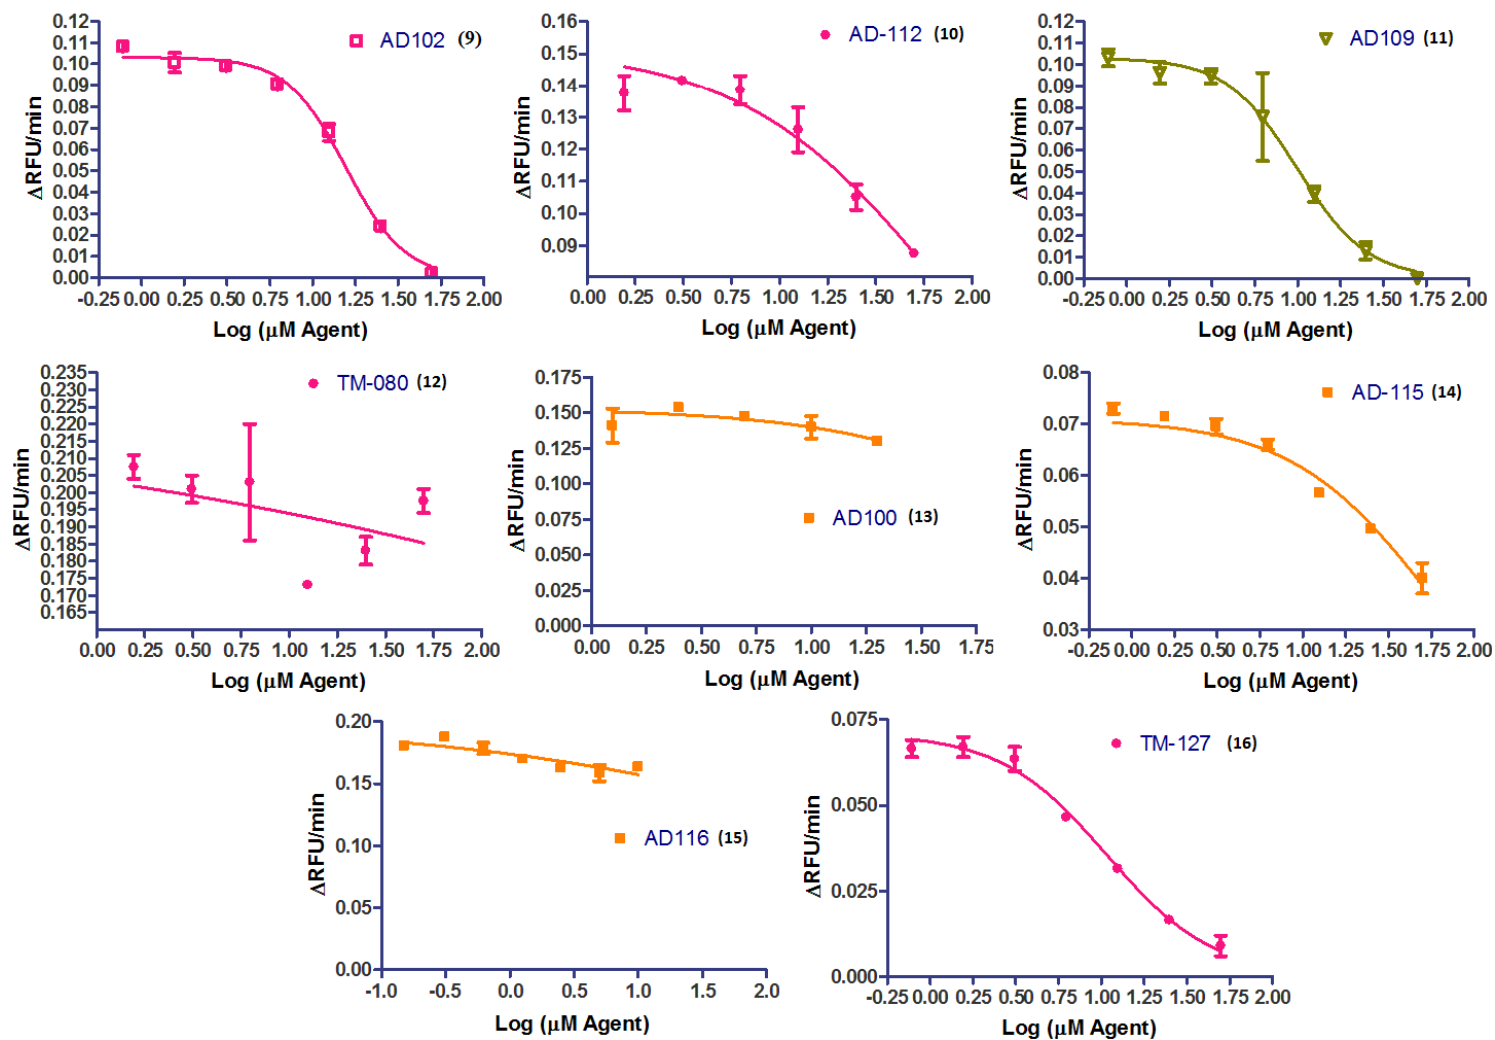

**Figure S2:** The inhibition of chymotryptic-like activity of purified human 20S proteasome.  
(Quinolines 9 to 16)

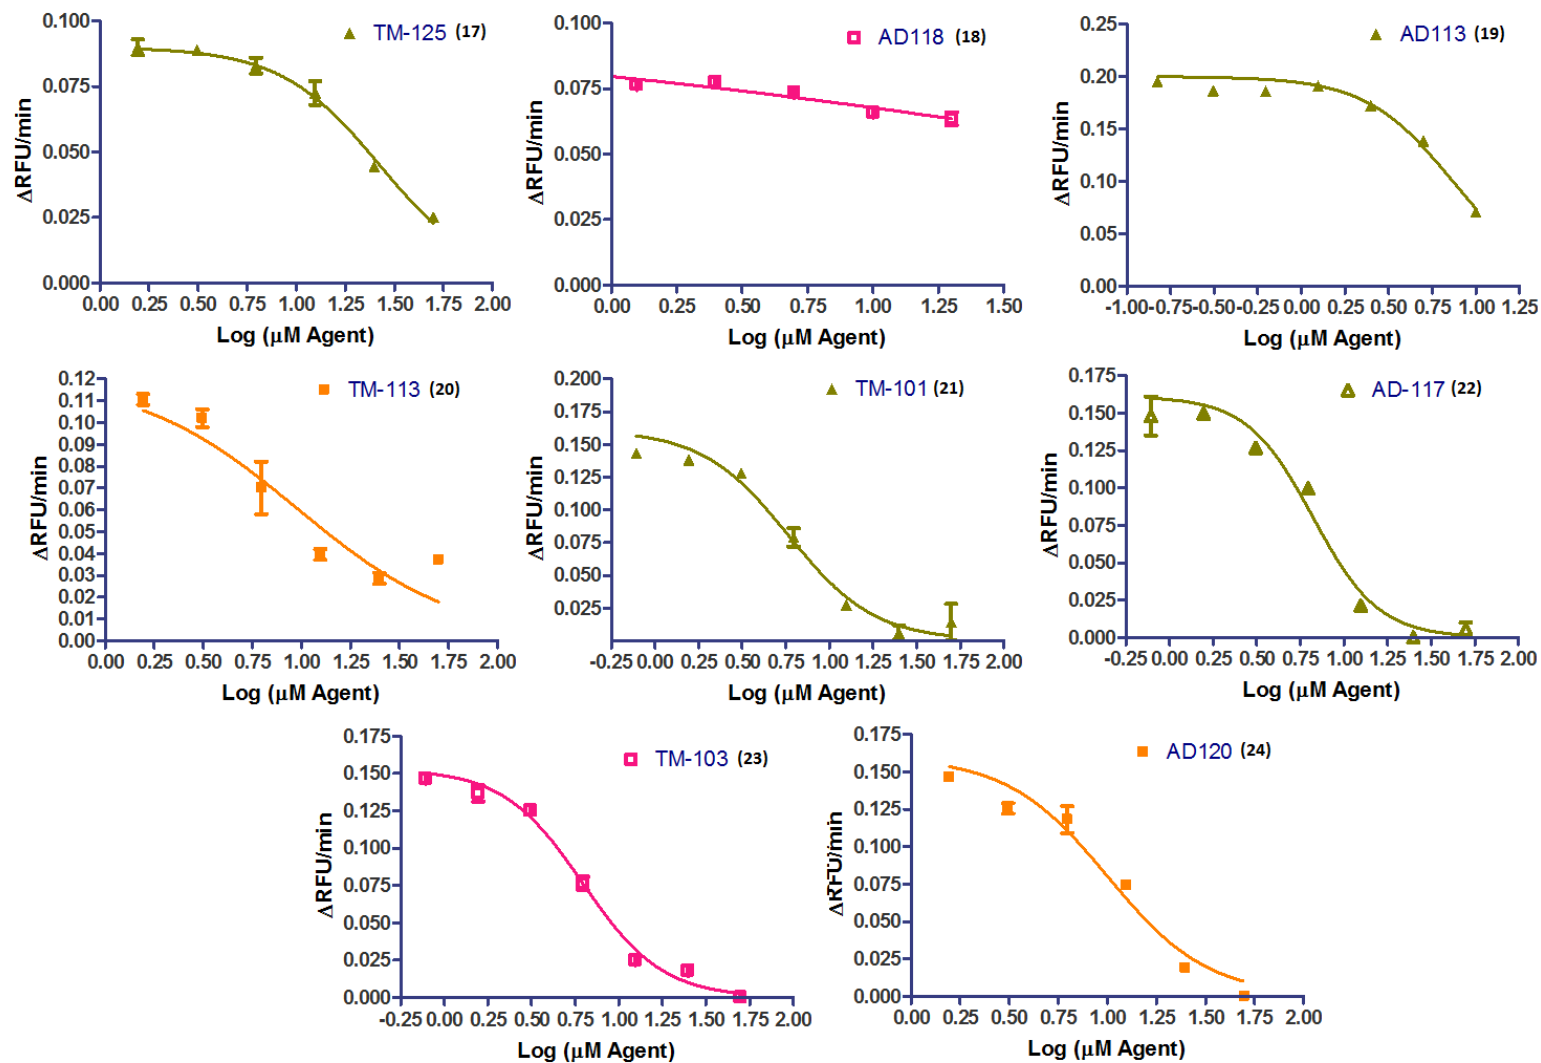

**Figure S3:** The inhibition of chymotryptic-like activity of purified human 20S proteasome.  
(Quinolines 17 to 24)

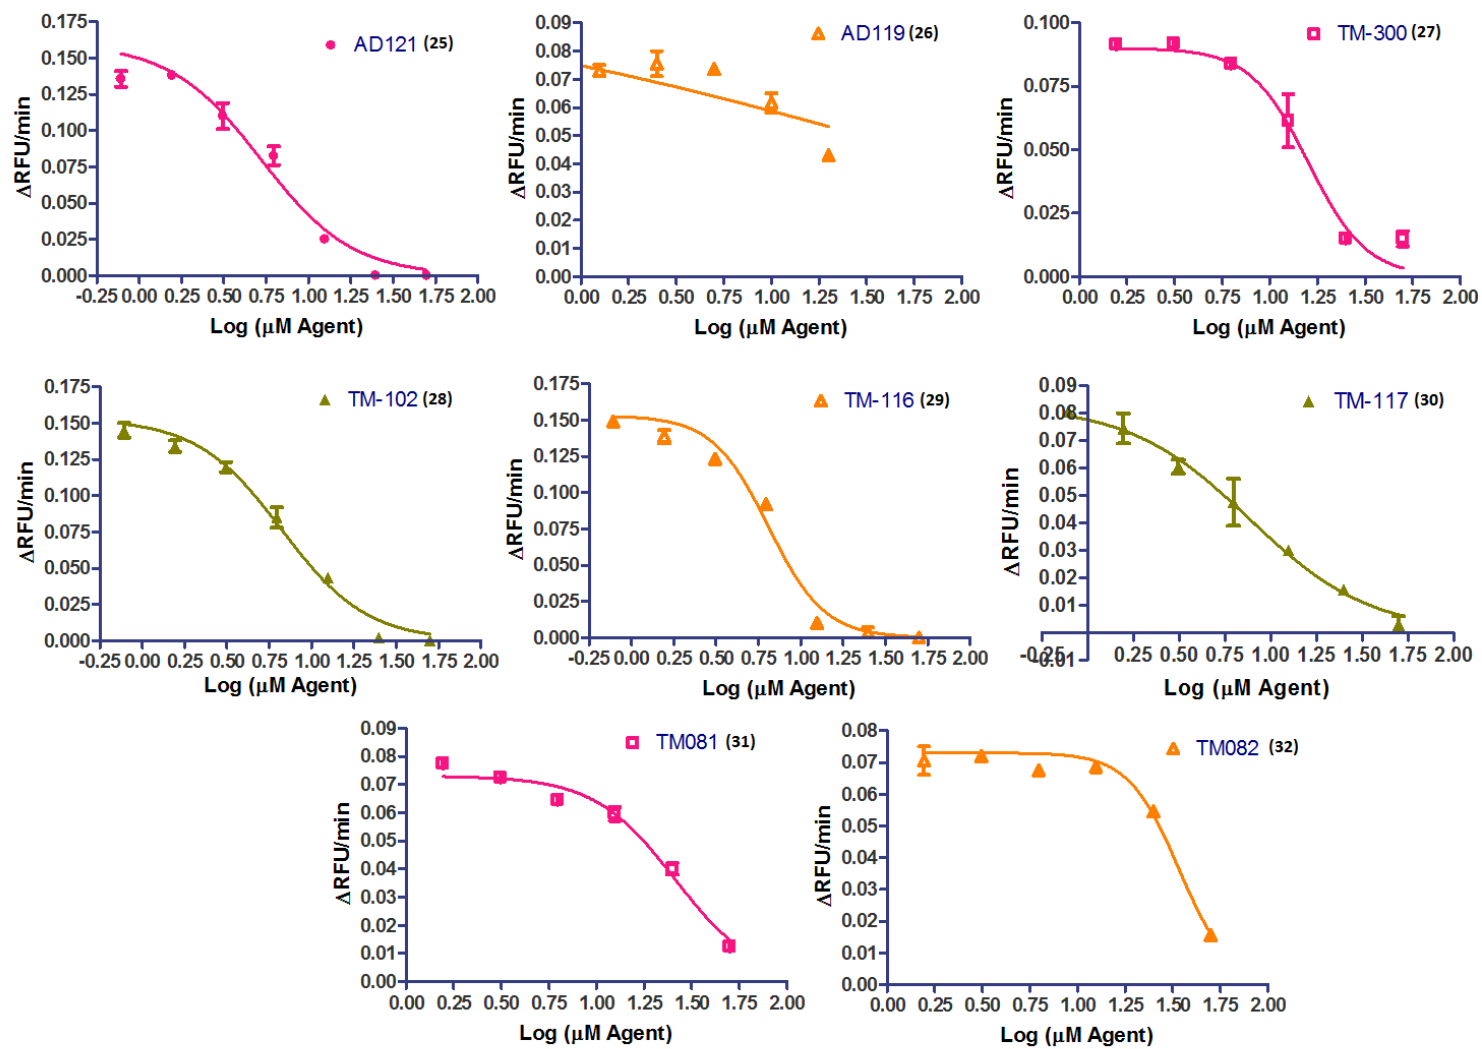

**Figure S4:** The inhibition of chymotryptic-like activity of purified human 20S proteasome.  
(Quinolines 25 to 32)

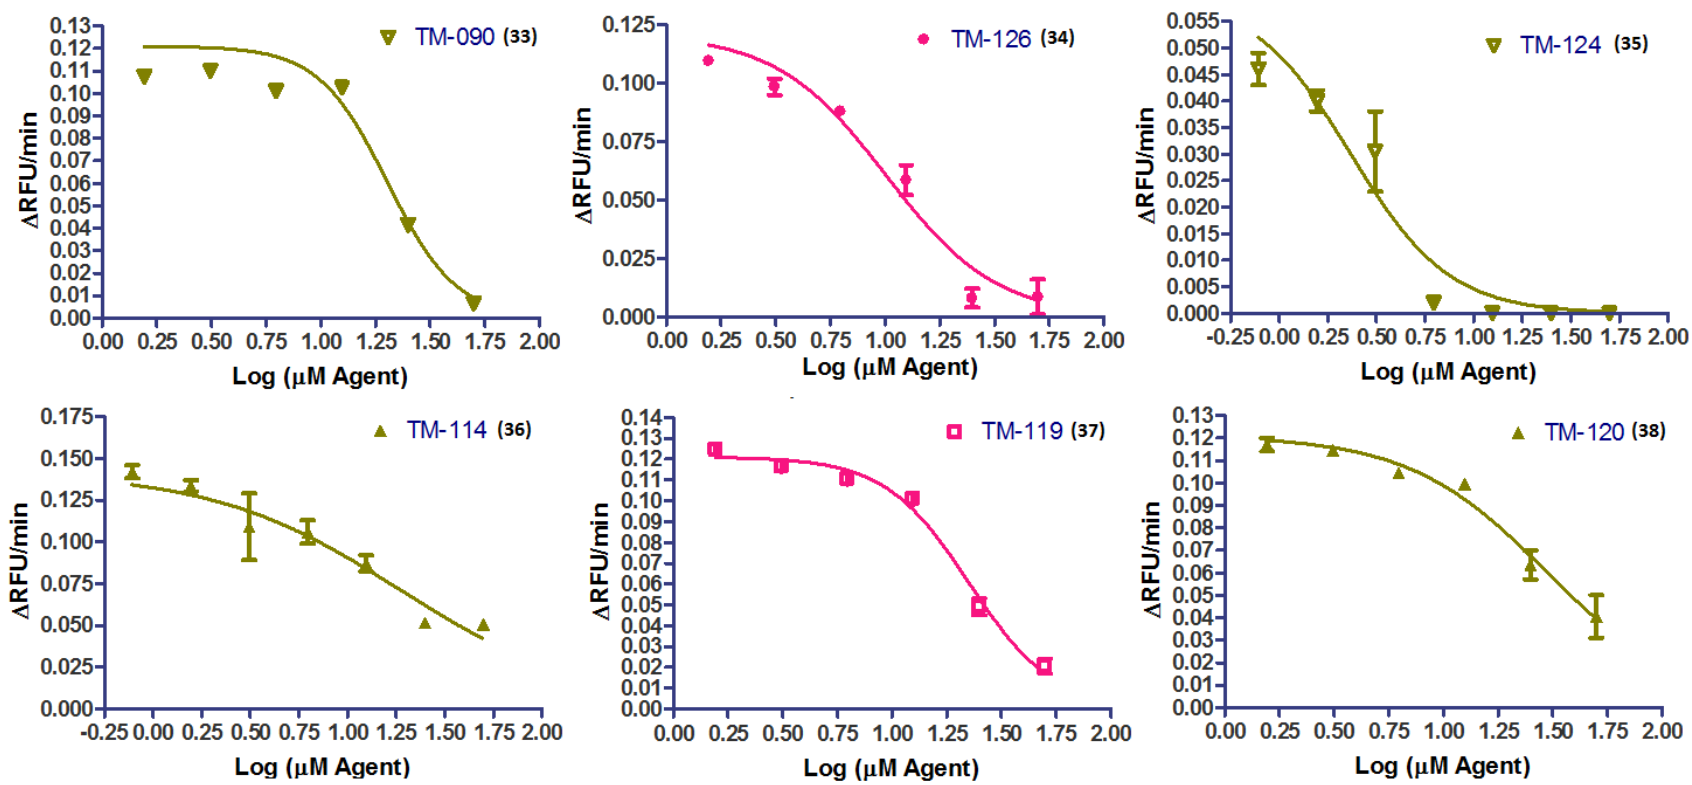

**Figure S5:** The inhibition of chymotryptic-like activity of purified human 20S proteasome.  
(Quinolines 33 to 38)



|                                                 | AD110 (1)        | AD111 (2)           | AD103 (3)         | AD104 (4)        | AD108 (5)        |
|-------------------------------------------------|------------------|---------------------|-------------------|------------------|------------------|
| <b>Sigmoidal dose-response (variable slope)</b> |                  |                     |                   |                  |                  |
| <b>Best-fit values</b>                          |                  |                     |                   |                  |                  |
| <b>BOTTOM</b>                                   | 0                | 0                   | 0                 | 0                | 0                |
| <b>TOP</b>                                      | 0.153            | 0.067               | 0.064             | 0.103            | 0.06             |
| <b>LOGIC<sub>50</sub></b>                       | 2.196            | -5.753              | 1.908             | 1.322            | 1.132            |
| <b>HILLSLOPE</b>                                | -0.8588          | 0.2058              | -1.501            | -3.259           | -2.791           |
| <b>IC<sub>50</sub></b>                          | 156.9            | 1.77E-06            | 80.83             | 20.98            | 13.54            |
| <b>Std. Error</b>                               |                  |                     |                   |                  |                  |
| <b>LOGIC<sub>50</sub></b>                       | 0.587            | 3.835               | 0.07863           | 0.01787          | 0.03306          |
| <b>HILLSLOPE</b>                                | 0.4622           | 0.1341              | 0.2812            | 0.3861           | 0.5405           |
| <b>95% Confidence Intervals</b>                 |                  |                     |                   |                  |                  |
| <b>LOGIC<sub>50</sub></b>                       | 0.8420 to 3.549  | -14.11 to 2.603     | 1.726 to 2.089    | 1.283 to 1.361   | 1.060 to 1.204   |
| <b>HILLSLOPE</b>                                | -1.925 to 0.2070 | -0.08633 to 0.4980  | -2.149 to -0.8524 | -4.101 to -2.418 | -3.969 to -1.614 |
| <b>IC<sub>50</sub></b>                          | 6.951 to 3542    | 7.767e-015 to 401.1 | 53.24 to 122.7    | 19.18 to 22.95   | 11.47 to 15.98   |
| <b>Goodness of Fit</b>                          |                  |                     |                   |                  |                  |
| <b>Degrees of Freedom</b>                       | 8                | 12                  | 8                 | 12               | 12               |
| <b>R<sup>2</sup></b>                            | 0.3591           | 0.1684              | 0.8968            | 0.9838           | 0.9631           |
| <b>Absolute Sum of Squares</b>                  | 0.0006809        | 5.94E-05            | 4.86E-05          | 0.0003347        | 0.0003402        |
| <b>Standard Deviation of Residuals</b>          | 0.009225         | 0.002225            | 0.002464          | 0.005281         | 0.005325         |
| <b>Constraints</b>                              |                  |                     |                   |                  |                  |
| <b>BOTTOM</b>                                   | BOTTOM = 0.0     | BOTTOM = 0.0        | BOTTOM = 0.0      | BOTTOM = 0.0     | BOTTOM = 0.0     |
| <b>TOP</b>                                      | TOP = 0.1530     | TOP = 0.0670        | TOP = 0.0640      | TOP = 0.1030     | TOP = 0.0600     |
| <b>Data</b>                                     |                  |                     |                   |                  |                  |
| <b>Number of X values</b>                       | 5                | 8                   | 7                 | 7                | 7                |
| <b>Number of Y replicates</b>                   | 2                | 2                   | 2                 | 2                | 2                |
| <b>Total number of values</b>                   | 10               | 14                  | 10                | 14               | 14               |
| <b>Number of missing values</b>                 | 0                | 2                   | 4                 | 0                | 0                |

**Table S1:** Statistical analysis for the inhibition of chymotryptic-like activity of purified human 20S proteasome (Quinolines 1 to 5)

|                                                 | AD039 (6)        | AD043 (7)        | TM-043 (8)        | AD102 (9)        | AD-112 (10)       |
|-------------------------------------------------|------------------|------------------|-------------------|------------------|-------------------|
| <b>Sigmoidal dose-response (variable slope)</b> |                  |                  |                   |                  |                   |
| <b>Best-fit values</b>                          |                  |                  |                   |                  |                   |
| <b>BOTTOM</b>                                   | 0                | 0                | 0                 | 0                | 0                 |
| <b>TOP</b>                                      | 0.103            | 0.103            | 0.153             | 0.103            | 0.152             |
| <b>LOGIC<sub>50</sub></b>                       | 1.273            | 1.155            | 1.28              | 1.195            | 1.86              |
| <b>HILLSLOPE</b>                                | -2.143           | -1.973           | -0.9075           | -2.524           | -0.8281           |
| <b>IC<sub>50</sub></b>                          | 18.76            | 14.3             | 19.04             | 15.67            | 72.43             |
| <b>Std. Error</b>                               |                  |                  |                   |                  |                   |
| <b>LOGIC<sub>50</sub></b>                       | 0.04102          | 0.0408           | 0.0394            | 0.0159           | 0.07215           |
| <b>HILLSLOPE</b>                                | 0.3928           | 0.3294           | 0.08148           | 0.205            | 0.1027            |
| <b>95% Confidence Intervals</b>                 |                  |                  |                   |                  |                   |
| <b>LOGIC<sub>50</sub></b>                       | 1.182 to 1.365   | 1.067 to 1.244   | 1.194 to 1.366    | 1.160 to 1.230   | 1.699 to 2.021    |
| <b>HILLSLOPE</b>                                | -3.018 to -1.268 | -2.691 to -1.256 | -1.085 to -0.7299 | -2.971 to -2.078 | -1.057 to -0.5993 |
| <b>IC<sub>50</sub></b>                          | 15.20 to 23.15   | 11.66 to 17.55   | 15.63 to 23.20    | 14.47 to 16.97   | 50.02 to 104.9    |
| <b>Goodness of Fit</b>                          |                  |                  |                   |                  |                   |
| <b>Degrees of Freedom</b>                       | 10               | 12               | 12                | 12               | 10                |
| <b>R<sup>2</sup></b>                            | 0.9429           | 0.9462           | 0.9545            | 0.9901           | 0.9129            |
| <b>Absolute Sum of Squares</b>                  | 0.000967         | 0.001062         | 0.0007929         | 0.0002062        | 0.0004356         |
| <b>Standard Deviation of Residuals</b>          | 0.009834         | 0.009409         | 0.008129          | 0.004145         | 0.0066            |
| <b>Constraints</b>                              |                  |                  |                   |                  |                   |
| <b>BOTTOM</b>                                   | BOTTOM = 0.0     | BOTTOM = 0.0     | BOTTOM = 0.0      | BOTTOM = 0.0     | BOTTOM = 0.0      |
| <b>TOP</b>                                      | TOP = 0.1030     | TOP = 0.1030     | TOP = 0.1530      | TOP = 0.1030     | TOP = 0.1520      |
| <b>Data</b>                                     |                  |                  |                   |                  |                   |
| <b>Number of X values</b>                       | 7                | 7                | 7                 | 7                | 6                 |
| <b>Number of Y replicates</b>                   | 2                | 2                | 2                 | 2                | 2                 |
| <b>Total number of values</b>                   | 12               | 14               | 14                | 14               | 12                |
| <b>Number of missing values</b>                 | 2                | 0                | 0                 | 0                | 0                 |

**Table S2:** Statistical analysis for the inhibition of chymotryptic-like activity of purified human 20S proteasome  
(Quinolines 6 to 10)

|                                                 | AD109 (11)       | TM-080 (12)         | AD100 (13)      | AD-115 (14)       | AD116 (15)         |
|-------------------------------------------------|------------------|---------------------|-----------------|-------------------|--------------------|
| <b>Sigmoidal dose-response (variable slope)</b> |                  |                     |                 |                   |                    |
| <b>Best-fit values</b>                          |                  |                     |                 |                   |                    |
| <b>BOTTOM</b>                                   | 0                | 0                   | 0               | 0                 | 0                  |
| <b>TOP</b>                                      | 0.103            | 0.226               | 0.153           | 0.071             | 0.2                |
| <b>LOGIC<sub>50</sub></b>                       | 0.9969           | 5.427               | 1.521           | 1.772             | 3.219              |
| <b>HILLSLOPE</b>                                | -2.111           | -0.1764             | -2.711          | -1.044            | -0.2557            |
| <b>IC<sub>50</sub></b>                          | 9.93             | 267080              | 33.19           | 59.18             | 1655               |
| <b>Std. Error</b>                               |                  |                     |                 |                   |                    |
| <b>LOGIC<sub>50</sub></b>                       | 0.03965          | 3.202               | 0.265           | 0.04401           | 0.5925             |
| <b>HILLSLOPE</b>                                | 0.3594           | 0.1296              | 2.94            | 0.1044            | 0.05242            |
| <b>95% Confidence Intervals</b>                 |                  |                     |                 |                   |                    |
| <b>LOGIC<sub>50</sub></b>                       | 0.9105 to 1.083  | -1.708 to 12.56     | 0.9100 to 2.132 | 1.676 to 1.868    | 1.928 to 4.510     |
| <b>HILLSLOPE</b>                                | -2.894 to -1.328 | -0.4653 to 0.1124   | -9.491 to 4.069 | -1.271 to -0.8161 | -0.3699 to -0.1414 |
| <b>IC<sub>50</sub></b>                          | 8.138 to 12.12   | 0.0196 to 3.643e+12 | 8.128 to 135.6  | 47.46 to 73.81    | 84.66 to 32336     |
| <b>Goodness of Fit</b>                          |                  |                     |                 |                   |                    |
| <b>Degrees of Freedom</b>                       | 12               | 10                  | 8               | 12                | 12                 |
| <b>R<sup>2</sup></b>                            | 0.9524           | 0.1818              | 0.4787          | 0.9575            | 0.6998             |
| <b>Absolute Sum of Squares</b>                  | 0.001076         | 0.002017            | 0.002118        | 8.16E-05          | 0.0004621          |
| <b>Standard Deviation of Residuals</b>          | 0.009469         | 0.0142              | 0.01627         | 0.002607          | 0.006206           |
| <b>Constraints</b>                              |                  |                     |                 |                   |                    |
| <b>BOTTOM</b>                                   | BOTTOM = 0.0     | BOTTOM = 0.0        | BOTTOM = 0.0    | BOTTOM = 0.0      | BOTTOM = 0.0       |
| <b>TOP</b>                                      | TOP = 0.1030     | TOP = 0.2260        | TOP = 0.1530    | TOP = 0.0710      | TOP = 0.2000       |
| <b>Data</b>                                     |                  |                     |                 |                   |                    |
| <b>Number of X values</b>                       | 7                | 6                   | 5               | 7                 | 7                  |
| <b>Number of Y replicates</b>                   | 2                | 2                   | 2               | 2                 | 2                  |
| <b>Total number of values</b>                   | 14               | 12                  | 10              | 14                | 14                 |
| <b>Number of missing values</b>                 | 0                | 0                   | 0               | 0                 | 0                  |

**Table S3:** Statistical analysis for the inhibition of chymotryptic-like activity of purified human 20S proteasome (Quinolines 11 to 15)

|                                                 | TM-127 (16)      | TM-125 (17)      | AD118 (18)         | AD113 (19)       | TM-113 (20)       |
|-------------------------------------------------|------------------|------------------|--------------------|------------------|-------------------|
| <b>Sigmoidal dose-response (variable slope)</b> |                  |                  |                    |                  |                   |
| <b>Best-fit values</b>                          |                  |                  |                    |                  |                   |
| <b>BOTTOM</b>                                   | 0                | 0                | 0                  | 0                | 0                 |
| <b>TOP</b>                                      | 0.066            | 0.09             | 0.1                | 0.2              | 0.121             |
| <b>LOGIC<sub>50</sub></b>                       | 0.9586           | 1.426            | 2.188              | 0.8687           | 0.9798            |
| <b>HILLSLOPE</b>                                | -1.665           | -1.713           | -0.2707            | -1.738           | -1.06             |
| <b>IC<sub>50</sub></b>                          | 9.092            | 26.66            | 154.3              | 7.39             | 9.545             |
| <b>Std. Error</b>                               |                  |                  |                    |                  |                   |
| <b>LOGIC<sub>50</sub></b>                       | 0.02059          | 0.01892          | 0.2231             | 0.02202          | 0.06701           |
| <b>HILLSLOPE</b>                                | 0.1177           | 0.1285           | 0.03594            | 0.1633           | 0.1818            |
| <b>95% Confidence Intervals</b>                 |                  |                  |                    |                  |                   |
| <b>LOGIC<sub>50</sub></b>                       | 0.9138 to 1.003  | 1.384 to 1.468   | 1.702 to 2.675     | 0.8207 to 0.9166 | 0.8305 to 1.129   |
| <b>HILLSLOPE</b>                                | -1.921 to -1.408 | -1.999 to -1.427 | -0.3490 to -0.1924 | -2.094 to -1.382 | -1.465 to -0.6548 |
| <b>IC<sub>50</sub></b>                          | 8.199 to 10.08   | 24.19 to 29.37   | 50.40 to 472.7     | 6.618 to 8.254   | 6.768 to 13.46    |
| <b>Goodness of Fit</b>                          |                  |                  |                    |                  |                   |
| <b>Degrees of Freedom</b>                       | 12               | 10               | 12                 | 12               | 10                |
| <b>R<sup>2</sup></b>                            | 0.9883           | 0.9839           | 0.8395             | 0.9673           | 0.8687            |
| <b>Absolute Sum of Squares</b>                  | 9.38E-05         | 0.0001164        | 0.0001311          | 0.0007973        | 0.001683          |
| <b>Standard Deviation of Residuals</b>          | 0.002796         | 0.003412         | 0.003306           | 0.008151         | 0.01297           |
| <b>Constraints</b>                              |                  |                  |                    |                  |                   |
| <b>BOTTOM</b>                                   | BOTTOM = 0.0     | BOTTOM = 0.0     | BOTTOM = 0.0       | BOTTOM = 0.0     | BOTTOM = 0.0      |
| <b>TOP</b>                                      | TOP = 0.0660     | TOP = 0.0900     | TOP = 0.1000       | TOP = 0.2000     | TOP = 0.1210      |
| <b>Data</b>                                     |                  |                  |                    |                  |                   |
| <b>Number of X values</b>                       | 7                | 6                | 7                  | 7                | 6                 |
| <b>Number of Y replicates</b>                   | 2                | 2                | 2                  | 2                | 2                 |
| <b>Total number of values</b>                   | 14               | 12               | 14                 | 14               | 12                |
| <b>Number of missing values</b>                 | 0                | 0                | 0                  | 0                | 0                 |

**Table S4:** Statistical analysis for the inhibition of chymotryptic-like activity of purified human 20S proteasome (Quinolines 16 to 20)

|                                                 | TM-101 (21)      | AD-117 (22)      | TM-103 (23)      | AD120 (24)       | AD121 (25)       |
|-------------------------------------------------|------------------|------------------|------------------|------------------|------------------|
| <b>Sigmoidal dose-response (variable slope)</b> |                  |                  |                  |                  |                  |
| <b>Best-fit values</b>                          |                  |                  |                  |                  |                  |
| <b>BOTTOM</b>                                   | 0                | 0                | 0                | 0                | 0                |
| <b>TOP</b>                                      | 0.161            | 0.161            | 0.142            | 0.16             | 0.16             |
| <b>LOGIC<sub>50</sub></b>                       | 0.7652           | 0.8222           | 0.6951           | 1.002            | 0.7207           |
| <b>HILLSLOPE</b>                                | -1.756           | -2.3             | -1.5             | -1.697           | -1.612           |
| <b>IC<sub>50</sub></b>                          | 5.824            | 6.641            | 4.956            | 10.05            | 5.256            |
| <b>Std. Error</b>                               |                  |                  |                  |                  |                  |
| <b>LOGIC<sub>50</sub></b>                       | 0.03361          | 0.03003          | 0.03662          | 0.03567          | 0.03723          |
| <b>HILLSLOPE</b>                                | 0.212            | 0.325            | 0.186            | 0.214            | 0.1995           |
| <b>95% Confidence Intervals</b>                 |                  |                  |                  |                  |                  |
| <b>LOGIC<sub>50</sub></b>                       | 0.6920 to 0.8385 | 0.7568 to 0.8877 | 0.6123 to 0.7780 | 0.9229 to 1.082  | 0.6396 to 0.8018 |
| <b>HILLSLOPE</b>                                | -2.218 to -1.294 | -3.009 to -1.592 | -1.921 to -1.079 | -2.173 to -1.220 | -2.047 to -1.178 |
| <b>IC<sub>50</sub></b>                          | 4.920 to 6.894   | 5.712 to 7.721   | 4.096 to 5.998   | 8.373 to 12.07   | 4.361 to 6.336   |
| <b>Goodness of Fit</b>                          |                  |                  |                  |                  |                  |
| <b>Degrees of Freedom</b>                       | 12               | 12               | 9                | 10               | 12               |
| <b>R<sup>2</sup></b>                            | 0.965            | 0.9701           | 0.9656           | 0.9614           | 0.9615           |
| <b>Absolute Sum of Squares</b>                  | 0.001572         | 0.00165          | 0.0008108        | 0.001403         | 0.001747         |
| <b>Standard Deviation of Residuals</b>          | 0.01145          | 0.01173          | 0.009491         | 0.01185          | 0.01207          |
| <b>Constraints</b>                              |                  |                  |                  |                  |                  |
| <b>BOTTOM</b>                                   | BOTTOM = 0.0     |
| <b>TOP</b>                                      | TOP = 0.1610     | TOP = 0.1610     | TOP = 0.1420     | TOP = 0.1600     | TOP = 0.1600     |
| <b>Data</b>                                     |                  |                  |                  |                  |                  |
| <b>Number of X values</b>                       | 7                | 7                | 7                | 7                | 7                |
| <b>Number of Y replicates</b>                   | 2                | 2                | 2                | 2                | 2                |
| <b>Total number of values</b>                   | 14               | 14               | 11               | 12               | 14               |
| <b>Number of missing values</b>                 | 0                | 0                | 3                | 2                | 0                |

**Table S5:** Statistical analysis for the inhibition of chymotryptic-like activity of purified human 20S proteasome (Quinolines 21 to 25)

|                                                 | AD119 (26)         | TM-300 (27)      | TM-102 (28)      | TM-116 (29)      | TM-117 (30)      |
|-------------------------------------------------|--------------------|------------------|------------------|------------------|------------------|
| <b>Sigmoidal dose-response (variable slope)</b> |                    |                  |                  |                  |                  |
| <b>Best-fit values</b>                          |                    |                  |                  |                  |                  |
| <b>BOTTOM</b>                                   | 0                  | 0                | 0                | 0                | 0                |
| <b>TOP</b>                                      | 0.1                | 0.09             | 0.153            | 0.161            | 0.083            |
| <b>LOGIC<sub>50</sub></b>                       | 1.478              | 1.203            | 0.8245           | 0.8261           | 0.8826           |
| <b>HILLSLOPE</b>                                | -0.3197            | -2.842           | -1.729           | -2.45            | -1.309           |
| <b>IC<sub>50</sub></b>                          | 30.04              | 15.94            | 6.675            | 6.7              | 7.631            |
| <b>Std. Error</b>                               |                    |                  |                  |                  |                  |
| <b>LOGIC<sub>50</sub></b>                       | 0.2461             | 0.03177          | 0.02508          | 0.03708          | 0.03269          |
| <b>HILLSLOPE</b>                                | 0.07391            | 0.5078           | 0.1535           | 0.4596           | 0.1192           |
| <b>95% Confidence Intervals</b>                 |                    |                  |                  |                  |                  |
| <b>LOGIC<sub>50</sub></b>                       | 0.9413 to 2.014    | 1.132 to 1.273   | 0.7698 to 0.8791 | 0.7435 to 0.9087 | 0.8114 to 0.9538 |
| <b>HILLSLOPE</b>                                | -0.4807 to -0.1586 | -3.973 to -1.711 | -2.064 to -1.395 | -3.474 to -1.426 | -1.568 to -1.049 |
| <b>IC<sub>50</sub></b>                          | 8.737 to 103.3     | 13.54 to 18.76   | 5.886 to 7.570   | 5.539 to 8.103   | 6.477 to 8.992   |
| <b>Goodness of Fit</b>                          |                    |                  |                  |                  |                  |
| <b>Degrees of Freedom</b>                       | 12                 | 10               | 12               | 10               | 12               |
| <b>R<sup>2</sup></b>                            | 0.6228             | 0.9568           | 0.9827           | 0.9487           | 0.9727           |
| <b>Absolute Sum of Squares</b>                  | 0.000702           | 0.0005846        | 0.0007782        | 0.002236         | 0.000292         |
| <b>Standard Deviation of Residuals</b>          | 0.007649           | 0.007646         | 0.008053         | 0.01495          | 0.004933         |
| <b>Constraints</b>                              |                    |                  |                  |                  |                  |
| <b>BOTTOM</b>                                   | BOTTOM = 0.0       | BOTTOM = 0.0     | BOTTOM = 0.0     | BOTTOM = 0.0     | BOTTOM = 0.0     |
| <b>TOP</b>                                      | TOP = 0.1000       | TOP = 0.0900     | TOP = 0.1530     | TOP = 0.1610     | TOP = 0.0830     |
| <b>Data</b>                                     |                    |                  |                  |                  |                  |
| <b>Number of X values</b>                       | 7                  | 6                | 7                | 7                | 7                |
| <b>Number of Y replicates</b>                   | 2                  | 2                | 2                | 2                | 2                |
| <b>Total number of values</b>                   | 14                 | 12               | 14               | 12               | 14               |
| <b>Number of missing values</b>                 | 0                  | 0                | 0                | 2                | 0                |

**Table S6:** Statistical analysis for the inhibition of chymotryptic-like activity of purified human 20S proteasome (Quinolines 26 to 30)

|                                                 | TM081 (31)       | TM082 (32)       | TM-090 (33)      | TM-126 (34)      | TM-124 (35)        |
|-------------------------------------------------|------------------|------------------|------------------|------------------|--------------------|
| <b>Sigmoidal dose-response (variable slope)</b> |                  |                  |                  |                  | (Autofluorescence) |
| <b>Best-fit values</b>                          |                  |                  |                  |                  |                    |
| <b>BOTTOM</b>                                   | 0                | 0                | 0                | 0                | 0                  |
| <b>TOP</b>                                      | 0.073            | 0.073            | 0.121            | 0.121            | 0.06               |
| <b>LOGIC<sub>50</sub></b>                       | 1.411            | 1.532            | 1.304            | 1.006            | 0.3684             |
| <b>HILLSLOPE</b>                                | -2.053           | -3.277           | -2.762           | -1.727           | -1.709             |
| <b>IC<sub>50</sub></b>                          | 25.75            | 34.03            | 20.16            | 10.13            | 2.336              |
| <b>Std. Error</b>                               |                  |                  |                  |                  |                    |
| <b>LOGIC<sub>50</sub></b>                       | 0.02302          | 0.01729          | 0.03416          | 0.03981          | 0.05026            |
| <b>HILLSLOPE</b>                                | 0.2151           | 0.356            | 0.5267           | 0.2468           | 0.3146             |
| <b>95% Confidence Intervals</b>                 |                  |                  |                  |                  |                    |
| <b>LOGIC<sub>50</sub></b>                       | 1.359 to 1.462   | 1.493 to 1.570   | 1.228 to 1.381   | 0.9169 to 1.094  | 0.2589 to 0.4779   |
| <b>HILLSLOPE</b>                                | -2.532 to -1.573 | -4.070 to -2.484 | -3.935 to -1.588 | -2.277 to -1.177 | -2.394 to -1.023   |
| <b>IC<sub>50</sub></b>                          | 22.88 to 28.98   | 31.14 to 37.19   | 16.92 to 24.02   | 8.258 to 12.42   | 1.815 to 3.006     |
| <b>Goodness of Fit</b>                          |                  |                  |                  |                  |                    |
| <b>Degrees of Freedom</b>                       | 10               | 10               | 10               | 10               | 12                 |
| <b>R<sup>2</sup></b>                            | 0.9759           | 0.9739           | 0.9371           | 0.95             | 0.9139             |
| <b>Absolute Sum of Squares</b>                  | 0.000143         | 0.0001249        | 0.001193         | 0.001018         | 0.0004676          |
| <b>Standard Deviation of Residuals</b>          | 0.003781         | 0.003534         | 0.01092          | 0.01009          | 0.006242           |
| <b>Constraints</b>                              |                  |                  |                  |                  |                    |
| <b>BOTTOM</b>                                   | BOTTOM = 0.0       |
| <b>TOP</b>                                      | TOP = 0.0730     | TOP = 0.0730     | TOP = 0.1210     | TOP = 0.1210     | TOP = 0.0600       |
| <b>Data</b>                                     |                  |                  |                  |                  |                    |
| <b>Number of X values</b>                       | 6                | 6                | 6                | 6                | 7                  |
| <b>Number of Y replicates</b>                   | 2                | 2                | 2                | 2                | 2                  |
| <b>Total number of values</b>                   | 12               | 12               | 12               | 12               | 14                 |
| <b>Number of missing values</b>                 | 0                | 0                | 0                | 0                | 0                  |

**Table S7:** Statistical analysis for the inhibition of chymotryptic-like activity of purified human 20S proteasome (Quinolines 31 to 35)

|                                                     | TM-114 (36)       | TM-119 (37)      | TM-120 (38)      |
|-----------------------------------------------------|-------------------|------------------|------------------|
| <b>Sigmoidal dose-response<br/>(variable slope)</b> |                   |                  |                  |
| <b>Best-fit values</b>                              |                   |                  |                  |
| <b>BOTTOM</b>                                       | 0                 | 0                | 0                |
| <b>TOP</b>                                          | 0.142             | 0.121            | 0.121            |
| <b>LOG(IC<sub>50</sub>)</b>                         | 1.276             | 1.352            | 1.471            |
| <b>HILLSLOPE</b>                                    | -0.8933           | -2.257           | -1.378           |
| <b>IC<sub>50</sub></b>                              | 18.87             | 22.5             | 29.59            |
| <b>Std. Error</b>                                   |                   |                  |                  |
| <b>LOG(IC<sub>50</sub>)</b>                         | 0.06402           | 0.01827          | 0.03359          |
| <b>HILLSLOPE</b>                                    | 0.1288            | 0.1983           | 0.1557           |
| <b>95% Confidence Intervals</b>                     |                   |                  |                  |
| <b>LOG(IC<sub>50</sub>)</b>                         | 1.136 to 1.415    | 1.311 to 1.393   | 1.396 to 1.546   |
| <b>HILLSLOPE</b>                                    | -1.174 to -0.6126 | -2.699 to -1.815 | -1.725 to -1.031 |
| <b>IC<sub>50</sub></b>                              | 13.69 to 26.02    | 20.49 to 24.71   | 24.90 to 35.15   |
| <b>Goodness of Fit</b>                              |                   |                  |                  |
| <b>Degrees of Freedom</b>                           | 12                | 10               | 10               |
| <b>R<sup>2</sup></b>                                | 0.8951            | 0.9844           | 0.9532           |
| <b>Absolute Sum of Squares</b>                      | 0.001766          | 0.0002785        | 0.0004617        |
| <b>Standard Deviation of Residuals</b>              | 0.01213           | 0.005277         | 0.006795         |
| <b>Constraints</b>                                  |                   |                  |                  |
| <b>BOTTOM</b>                                       | BOTTOM = 0.0      | BOTTOM = 0.0     | BOTTOM = 0.0     |
| <b>TOP</b>                                          | TOP = 0.1420      | TOP = 0.1210     | TOP = 0.1210     |
| <b>Data</b>                                         |                   |                  |                  |
| <b>Number of X values</b>                           | 7                 | 6                | 6                |
| <b>Number of Y replicates</b>                       | 2                 | 2                | 2                |
| <b>Total number of values</b>                       | 14                | 12               | 12               |
| <b>Number of missing values</b>                     | 0                 | 0                | 0                |

**Table S8:** Statistical analysis for the inhibition of chymotryptic-like activity of purified human 20S proteasome (Quinolines 36 to 38)



## Selectivity of Quinoline 25

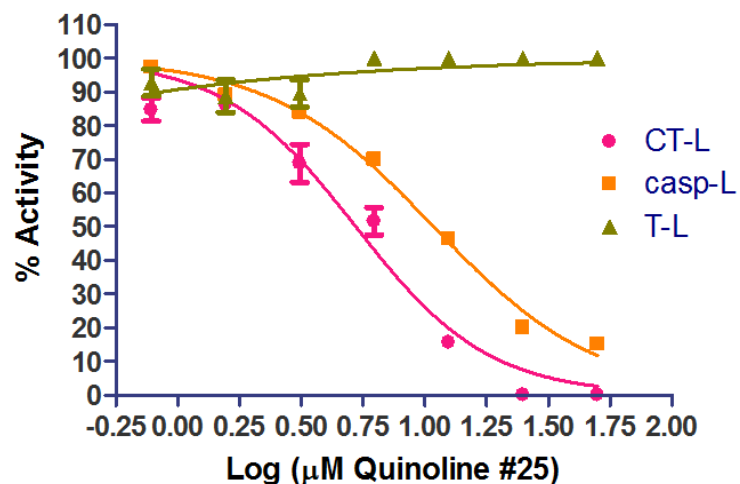

**Figure S6:** Quinoline 25 inhibits CT-L and Casp-L activity of the human proteasome. Fluorogenic substrates Suc-LLVY-AMC, Z-AAR-AMC and Z-LLE-AMC were used to measure CT-L, T-L and Casp-L activities of purified human 20S proteasome particles.

|                                                 | CT-L             | Casp-L           | T-L                 |
|-------------------------------------------------|------------------|------------------|---------------------|
| <b>Sigmoidal dose-response (variable slope)</b> |                  |                  |                     |
| <b>Best-fit values</b>                          |                  |                  |                     |
| BOTTOM                                          | 0                | 0                | 0                   |
| TOP                                             | 100              | 100              | 100                 |
| LOGEC50                                         | 0.7207           | 1.036            | -1.92               |
| HILL SLOPE                                      | -1.612           | -1.321           | 0.5137              |
| IC50                                            | 5.256            | 10.87            | N/A                 |
| <b>Std. Error</b>                               |                  |                  |                     |
| LOGIC50                                         | 0.03724          | 0.0181           | 1.292               |
| HILL SLOPE                                      | 0.1995           | 0.06836          | 0.3109              |
| <b>95% Confidence Intervals</b>                 |                  |                  |                     |
| LOGIC50                                         | 0.6395 to 0.8018 | 0.9967 to 1.076  | -4.799 to 0.9583    |
| HILL SLOPE                                      | -2.047 to -1.178 | -1.470 to -1.173 | -0.1791 to 1.206    |
| IC50                                            | 4.360 to 6.336   | 9.924 to 11.90   | 1.588e-005 to 9.085 |
| <b>Goodness of Fit</b>                          |                  |                  |                     |
| Degrees of Freedom                              | 12               | 12               | 10                  |
| R <sup>2</sup>                                  | 0.9614           | 0.9903           | 0.3769              |
| Absolute Sum of Squares                         | 682.8            | 130.1            | 256.2               |
| Standard Deviations of Residuals                | 7.543            | 3.293            | 5.061               |
| <b>Constraints</b>                              |                  |                  |                     |
| BOTTOM                                          | BOTTOM = 0.0     | BOTTOM = 0.0     | BOTTOM = 0.0        |
| TOP                                             | TOP = 100.0      | TOP = 100.0      | TOP = 100.0         |
| <b>Data</b>                                     |                  |                  |                     |
| Number of X values                              | 25               | 25               | 25                  |
| Number of Y replicates                          | 2                | 2                | 2                   |
| Total number of values                          | 14               | 14               | 12                  |
| Number of missing values                        | 36               | 36               | 38                  |

**Table S9:** Statistical analysis for the inhibition of chymotryptic-like activity of purified human 20S proteasome. Quinoline 25 inhibits CT-L activity ( $IC_{50} = 5.26 \mu\text{M}$ ) and Casp-L activity ( $IC_{50} = 10.87 \mu\text{M}$ ), but not the T-L activities of the 20S catalytic core ( $IC_{50} = >25 \mu\text{M}$ ).

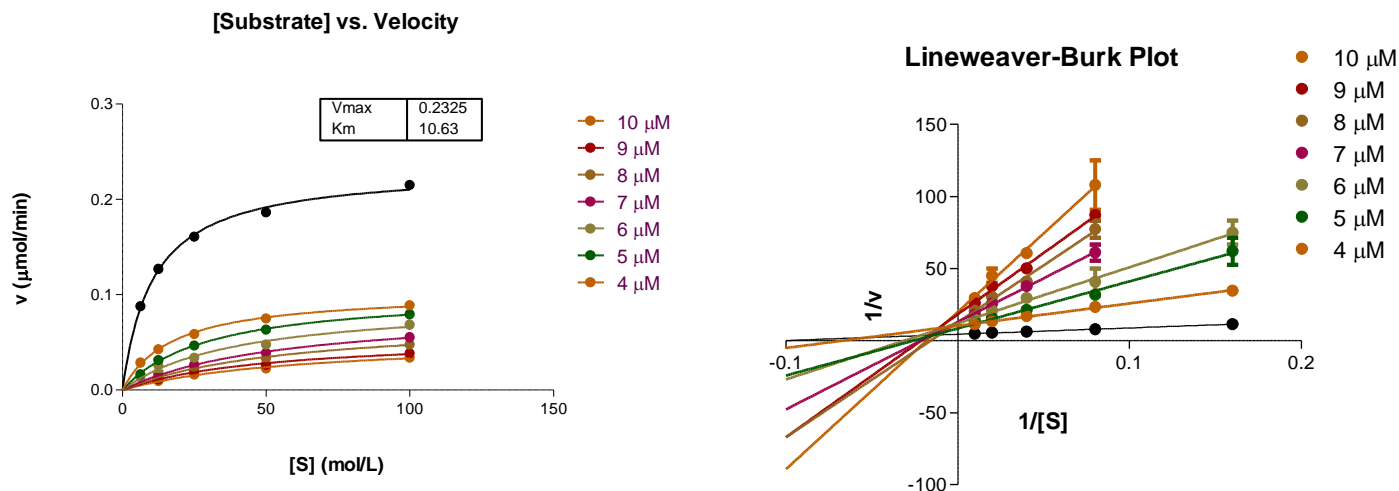

|                          | vehicle          | 10 $\mu$ M         | 9 $\mu$ M          | 8 $\mu$ M          | 7 $\mu$ M         | 6 $\mu$ M         | 5 $\mu$ M         | 4 $\mu$ M         |
|--------------------------|------------------|--------------------|--------------------|--------------------|-------------------|-------------------|-------------------|-------------------|
| Michaelis-Menten [2]     |                  |                    |                    |                    |                   |                   |                   |                   |
| Best-fit values          |                  |                    |                    |                    |                   |                   |                   |                   |
| Vmax                     | 0.2325           | 0.05414            | 0.05692            | 0.07422            | 0.08625           | 0.09304           | 0.1029            | 0.1030            |
| Km                       | 10.63            | 62.16              | 50.57              | 56.60              | 57.02             | 40.24             | 29.98             | 17.54             |
| Std. Error               |                  |                    |                    |                    |                   |                   |                   |                   |
| Vmax                     | 0.01587          | 0.008683           | 0.004206           | 0.006322           | 0.007711          | 0.009881          | 0.004568          | 0.003059          |
| Km                       | 2.601            | 19.61              | 7.917              | 9.805              | 10.34             | 9.609             | 3.308             | 1.557             |
| 95% Confidence Intervals |                  |                    |                    |                    |                   |                   |                   |                   |
| Vmax                     | 0.1959 to 0.2691 | 0.03289 to 0.07539 | 0.04663 to 0.06721 | 0.05875 to 0.08969 | 0.06738 to 0.1051 | 0.07026 to 0.1158 | 0.09235 to 0.1134 | 0.09590 to 0.1100 |
| Km                       | 4.633 to 16.63   | 14.18 to 110.1     | 31.20 to 69.94     | 32.61 to 80.59     | 31.72 to 82.32    | 18.08 to 62.39    | 22.35 to 37.61    | 13.95 to 21.13    |
| Goodness of Fit          |                  |                    |                    |                    |                   |                   |                   |                   |
| Degrees of Freedom       | 8                | 6                  | 6                  | 6                  | 6                 | 8                 | 8                 | 8                 |
| R square                 | 0.8711           | 0.9357             | 0.9799             | 0.9785             | 0.9760            | 0.9465            | 0.9862            | 0.9861            |
| Absolute Sum of Squares  | 0.002912         | 4.387e-005         | 1.577e-005         | 2.837e-005         | 4.157e-005        | 0.0001981         | 6.980e-005        | 6.514e-005        |
| Sy.x                     | 0.01908          | 0.002704           | 0.001621           | 0.002174           | 0.002632          | 0.004977          | 0.002954          | 0.002853          |
| Number of points         |                  |                    |                    |                    |                   |                   |                   |                   |
| Analyzed                 | 10               | 8                  | 8                  | 8                  | 8                 | 10                | 10                | 10                |

**Table S10.** Kinetic analysis of quinoline 7 inhibition of purified 20S proteasome. Lineweaver-Burk plot using Suc-LLVY-AMC consistent with a model of “mixed-type inhibition”. Proteasome activity was undetectable at the lowest amount of substrate thus these values are omitted in the L-B plot.

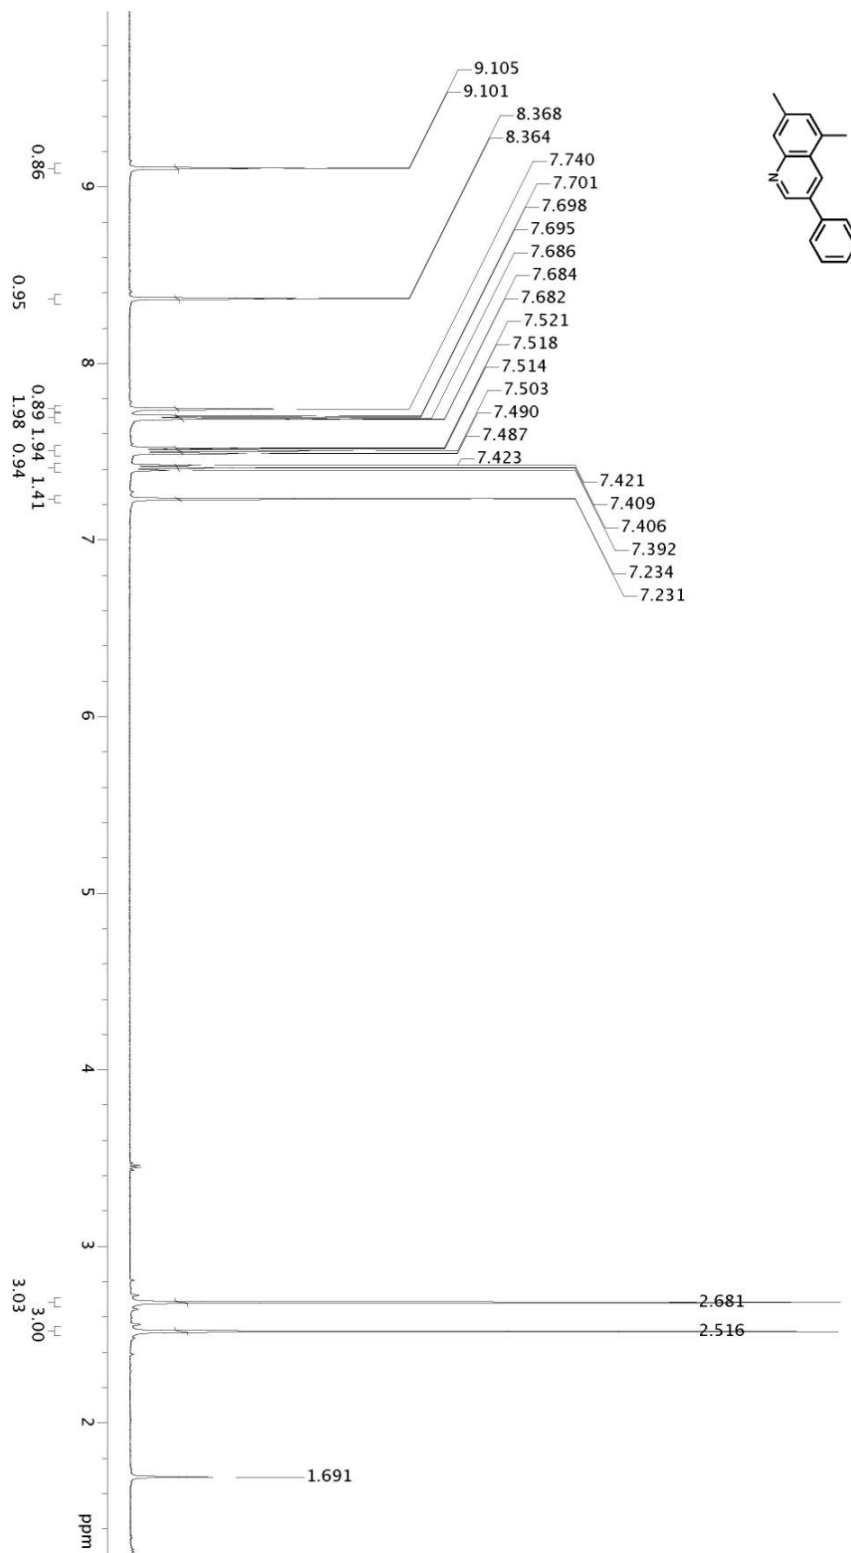

**Figure S7:**  $^1\text{H}$  NMR spectrum for compound 5,7-dimethyl-3-phenylquinoline.  
(AD104, Quinoline 4)

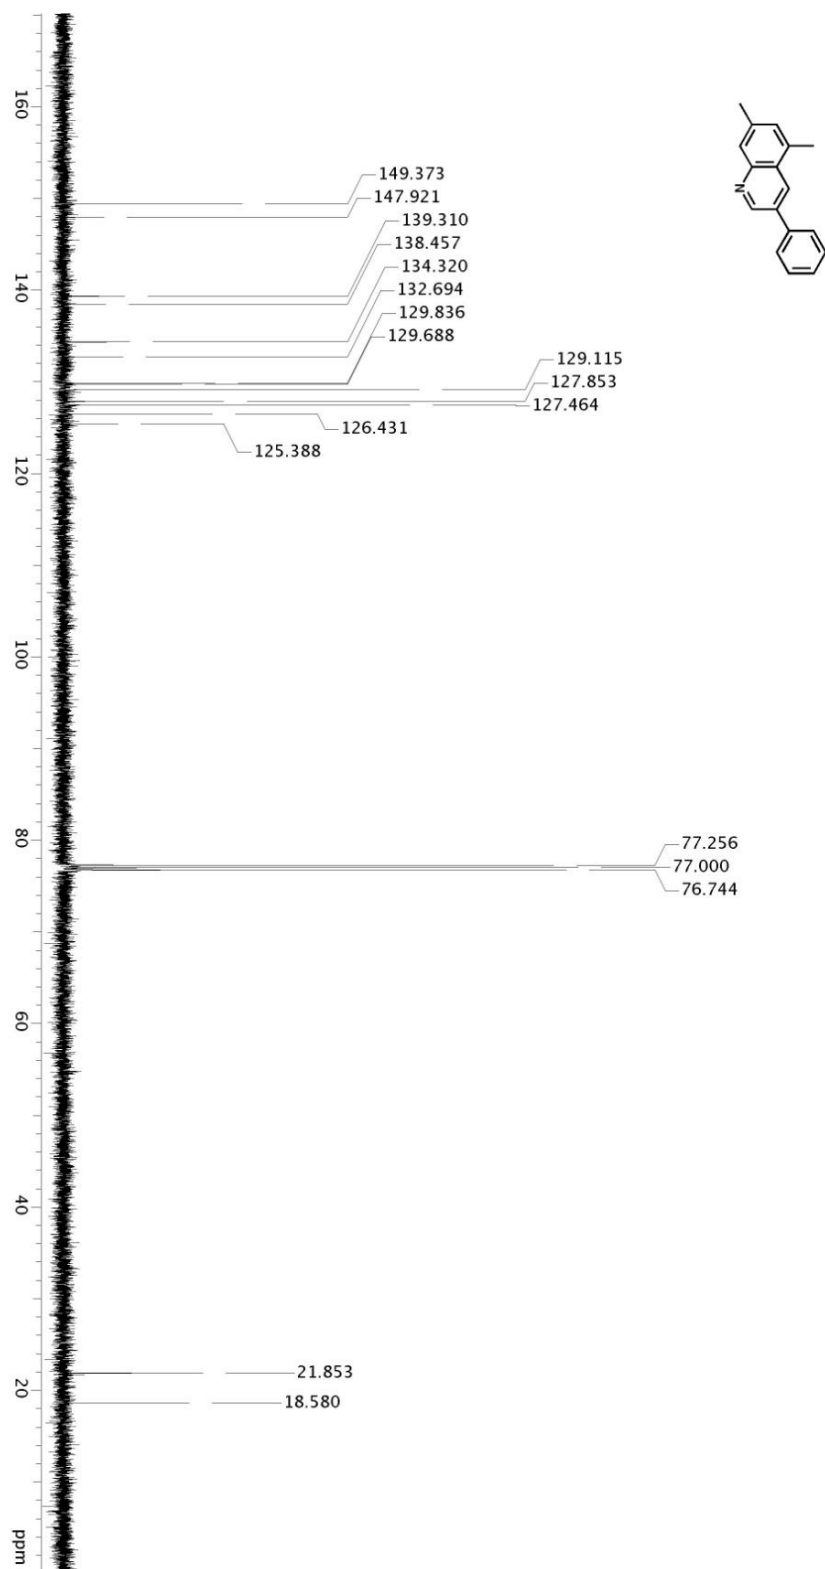

**Figure S8:** <sup>13</sup>C NMR spectrum for compound 5,7-dimethyl-3-phenylquinoline.  
(AD104, Quinoline 4)

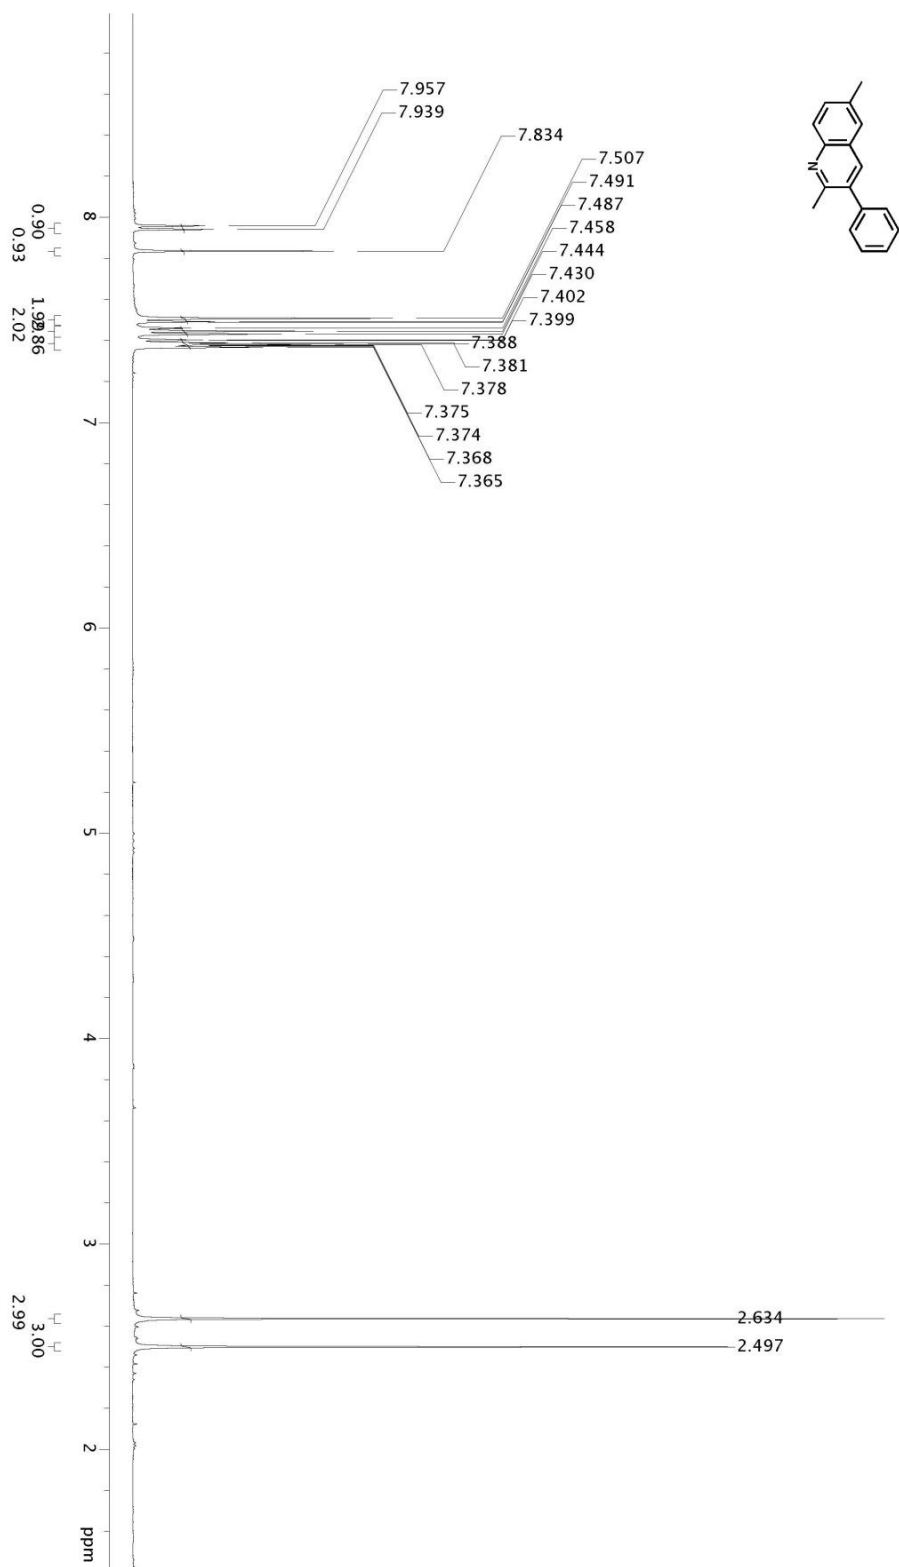

**Figure S9:**  $^1\text{H}$  NMR spectrum for compound 2,6-dimethyl-3-phenylquinoline.  
(AD108, Quinoline 5)

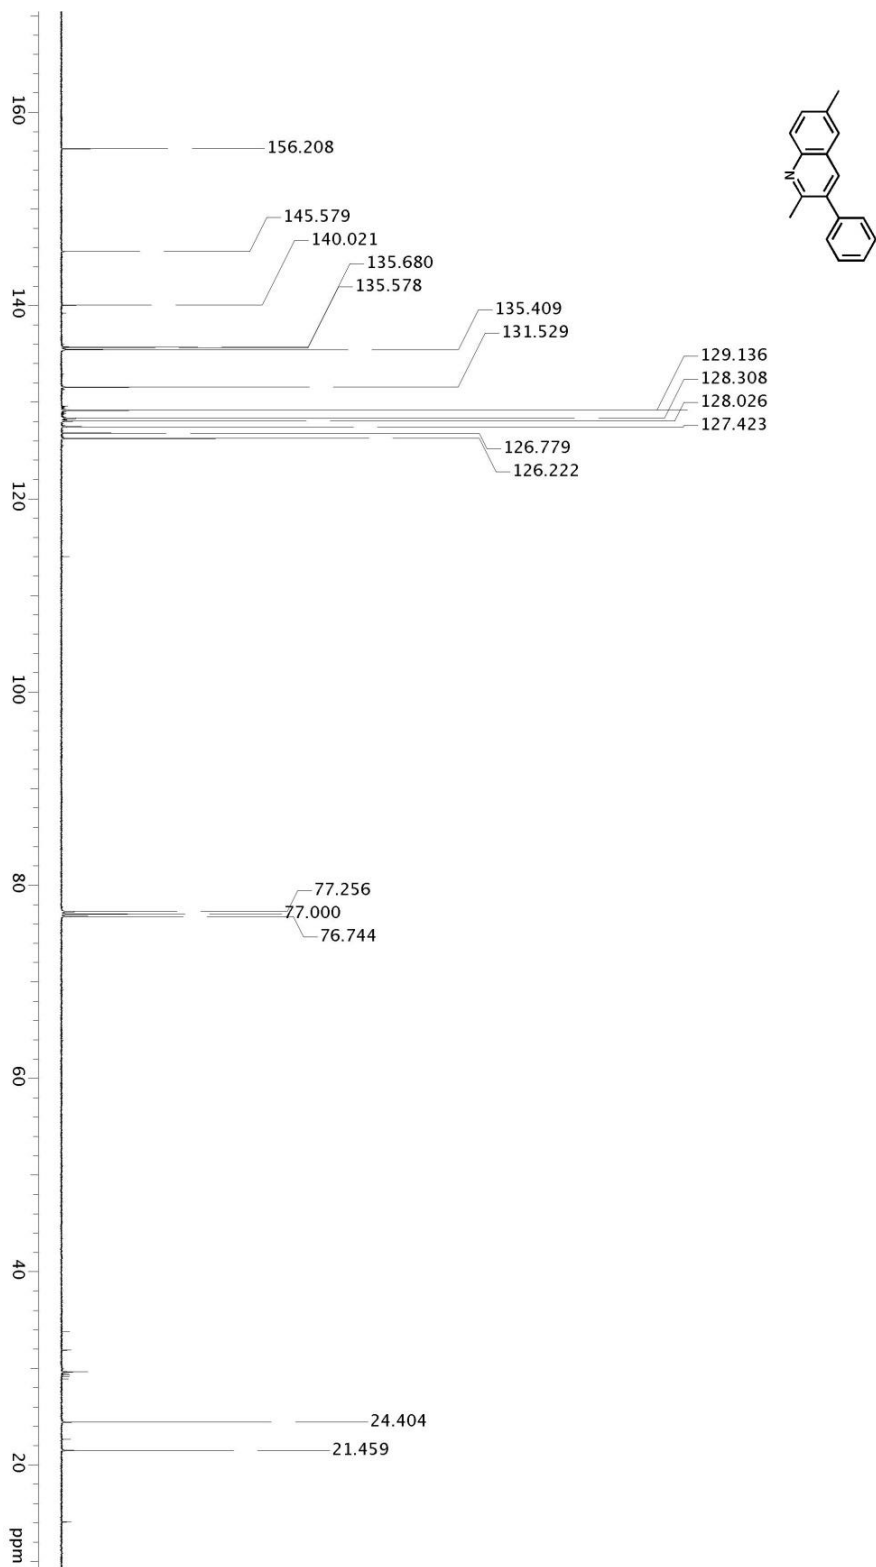

**Figure S10:**  $^{13}\text{C}$  NMR spectrum for compound 2,6-dimethyl-3-phenylquinoline.  
(AD108, Quinoline 5)

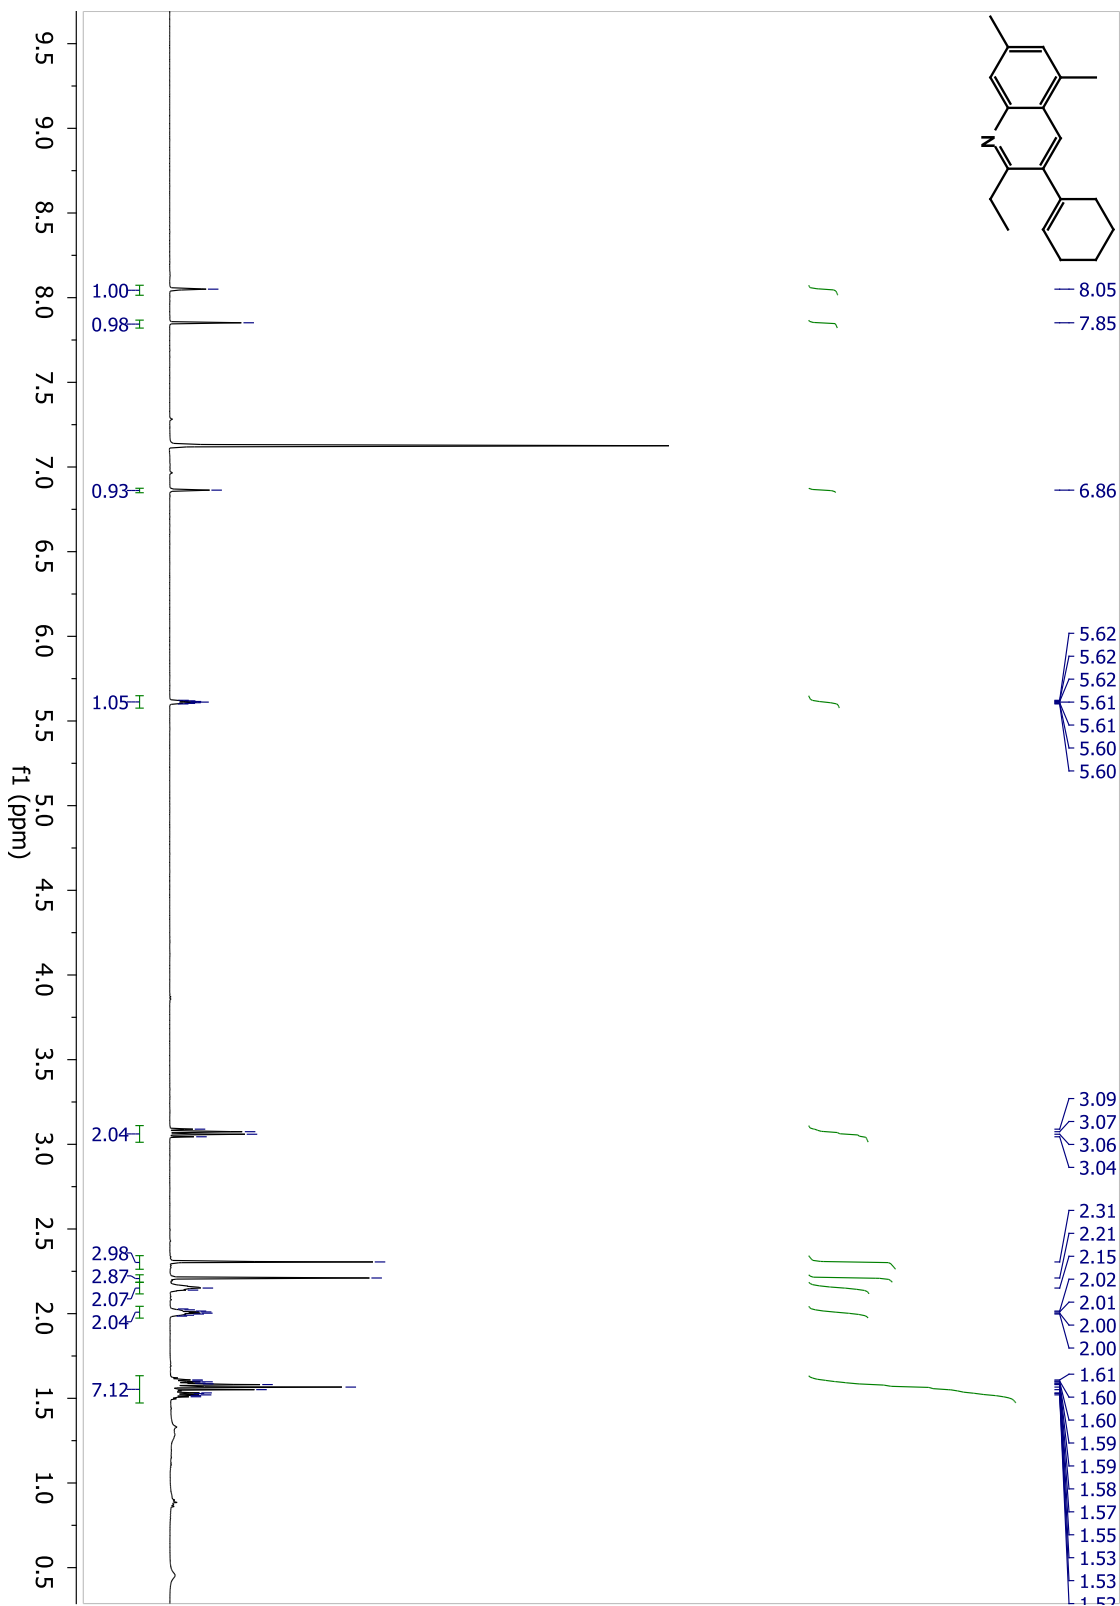

**Figure S11:** <sup>1</sup>H NMR spectrum for compound 2-ethyl-3-cyclohexenyl-5,7-dimethylquinoline.  
(TM-043, Quinoline 8)

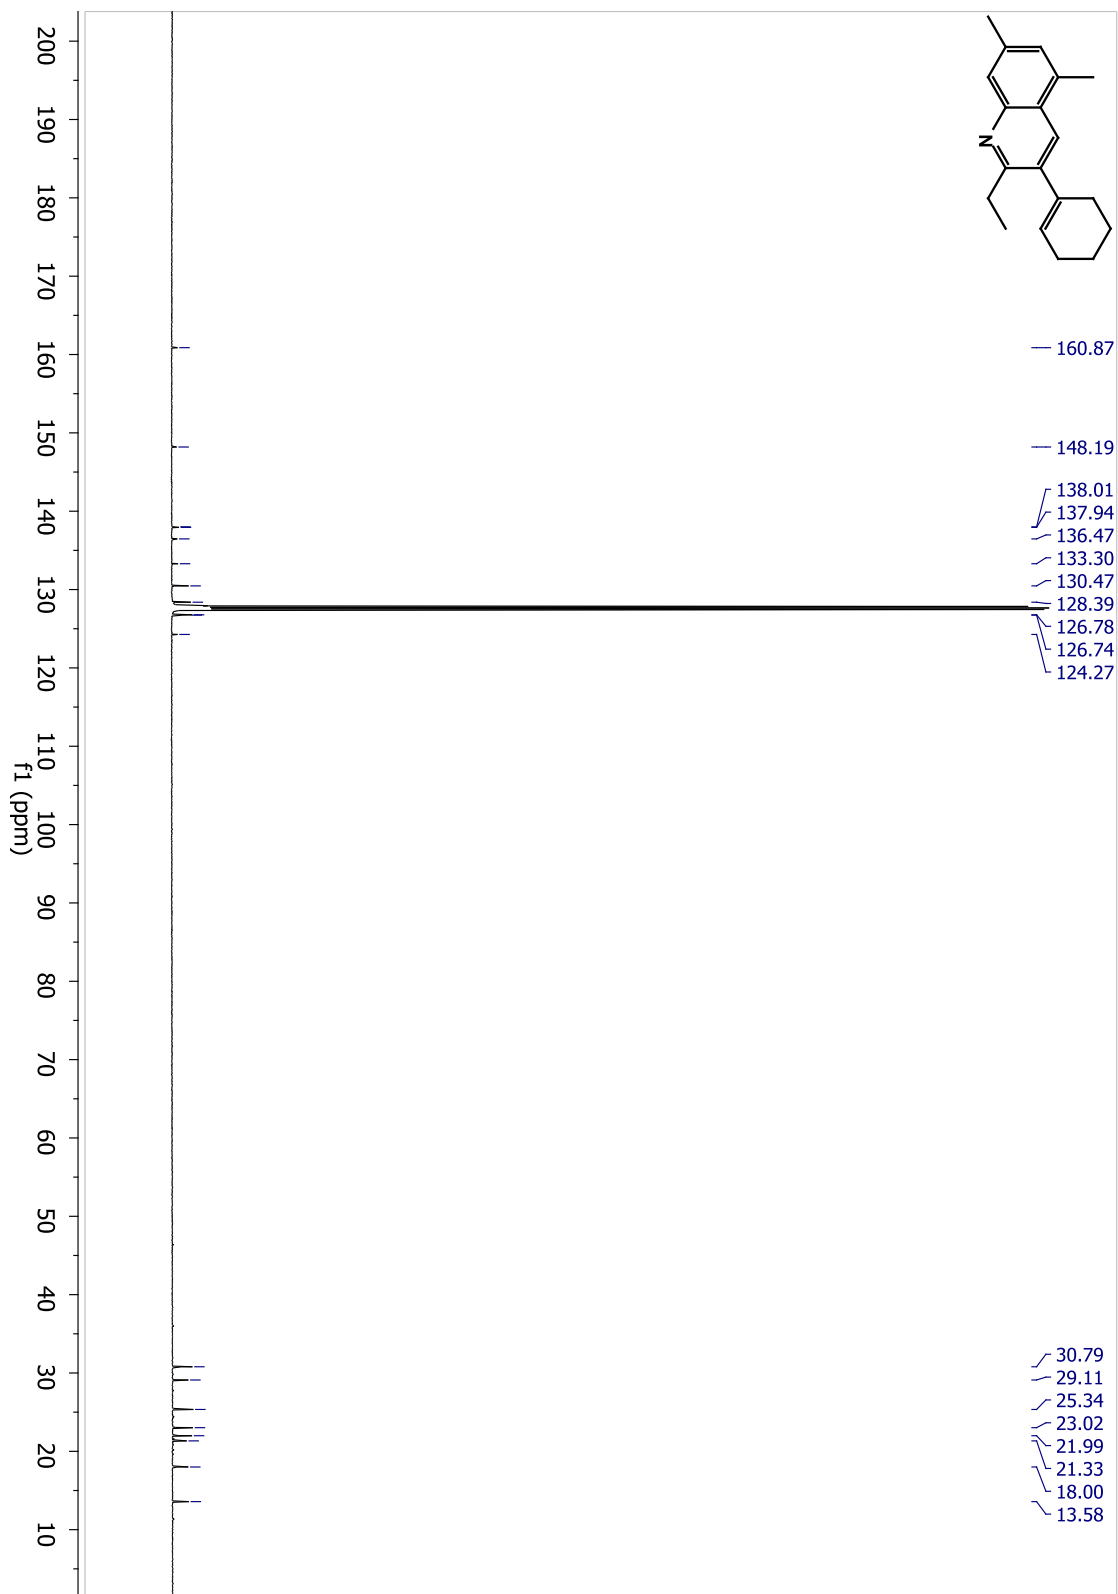

**Figure S12:**  $^{13}\text{C}$  NMR spectrum for compound 2-ethyl-3-cyclohexenyl-5,7-dimethylquinoline.

(TM-043, Quinoline 8)



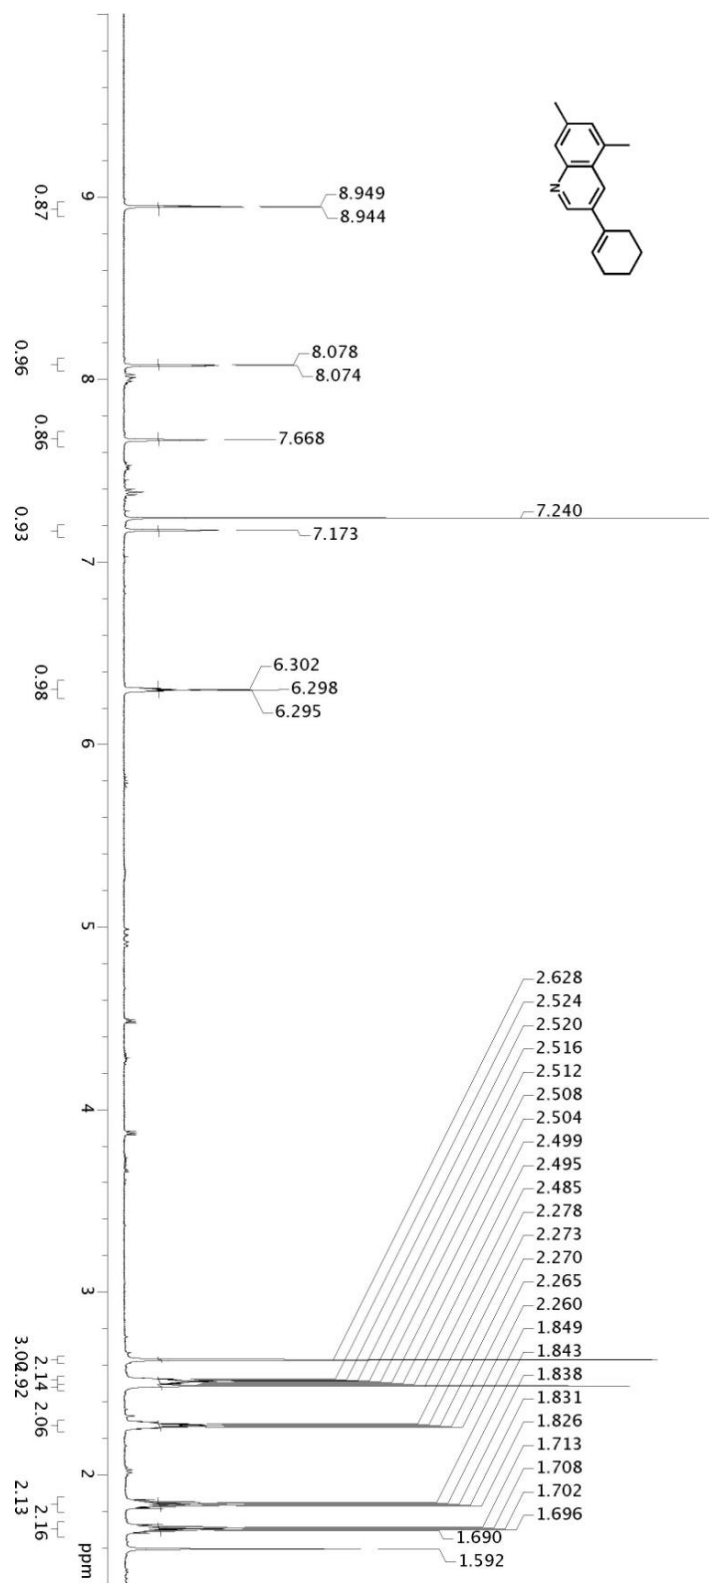

**Figure S13:**  $^1\text{H}$  NMR spectrum for compound 3-cyclohexenyl-5,7-dimethylquinoline.  
(AD102, Quinoline 9)

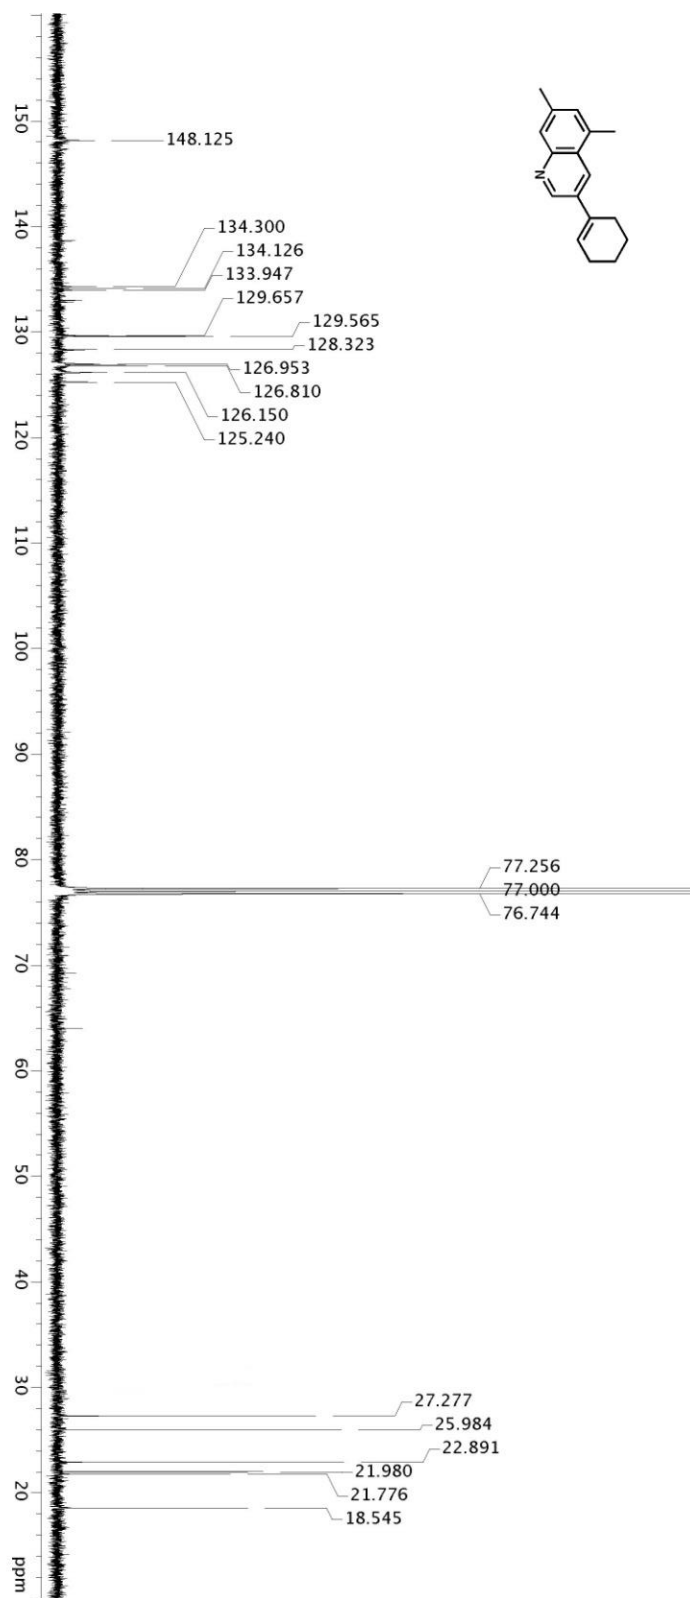

**Figure S14:**  $^{13}\text{C}$  NMR spectrum for compound 3-cyclohexenyl-5,7-dimethylquinoline.  
(AD102, Quinoline 9)

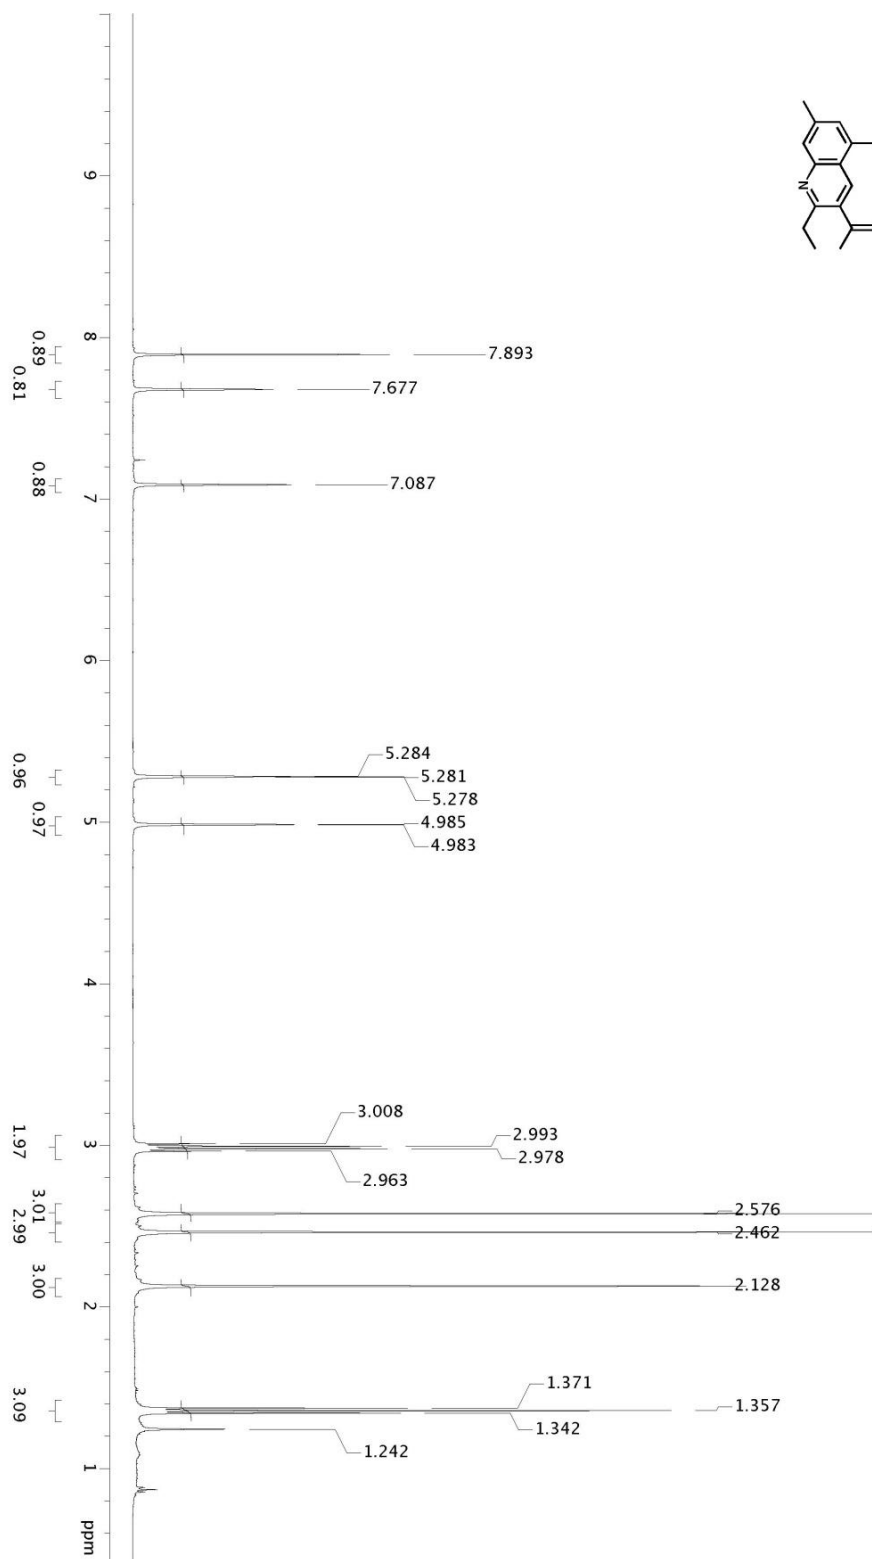

**Figure S15:** <sup>1</sup>H NMR spectrum for compound 2-ethyl-5,7-dimethyl-3-(prop-1-en-2-yl)quinoline. (AD112, Quinoline 10)

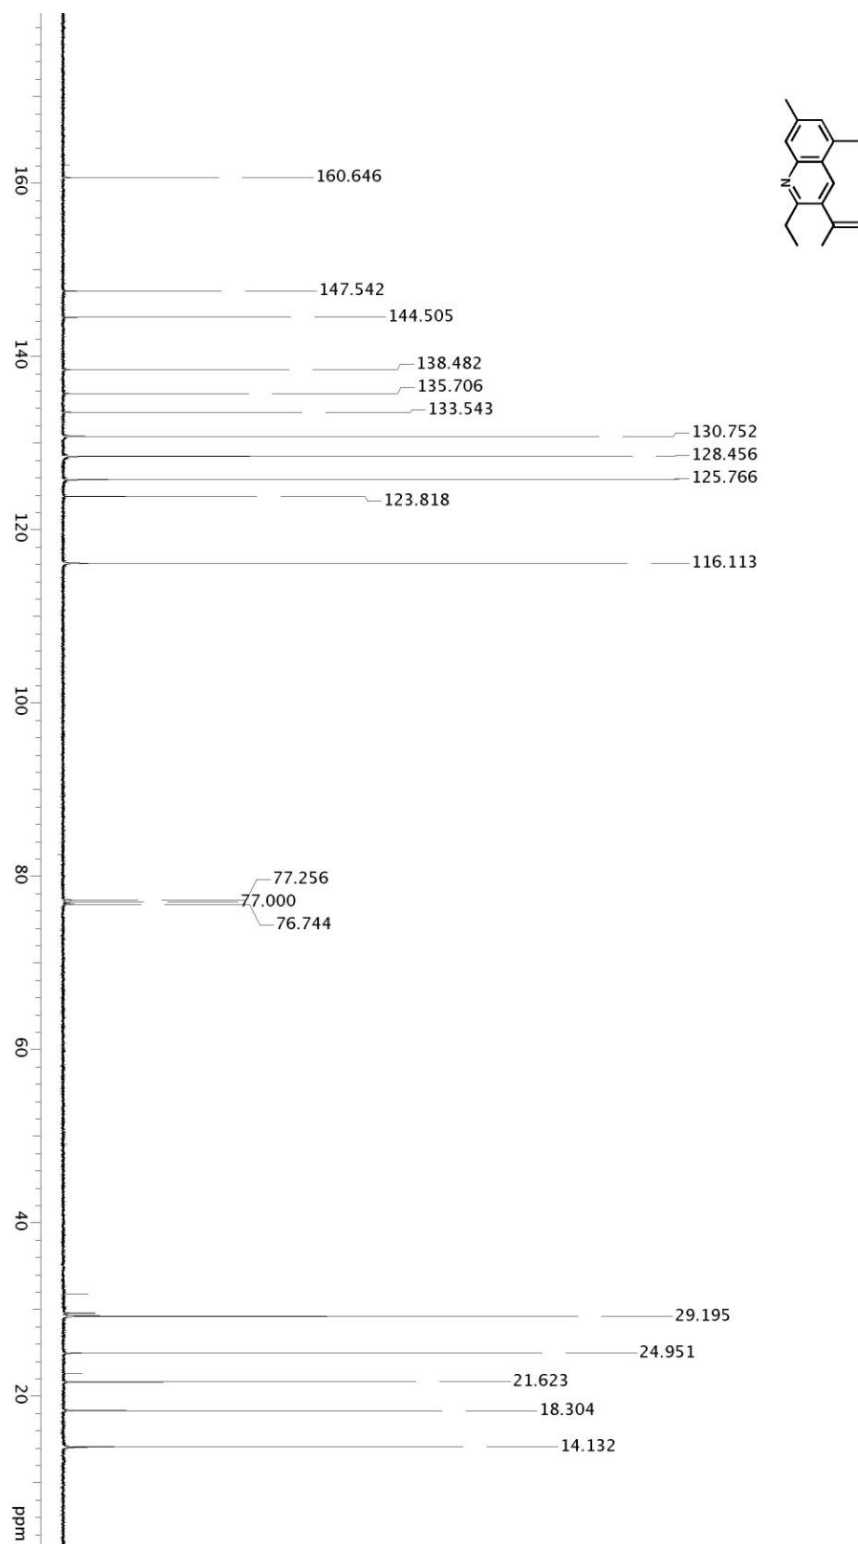

**Figure S16:**  $^{13}\text{C}$  NMR spectrum for compound 2-ethyl-5,7-dimethyl-3-(prop-1-en-2-yl)quinoline.  
(AD112, Quinoline 10)

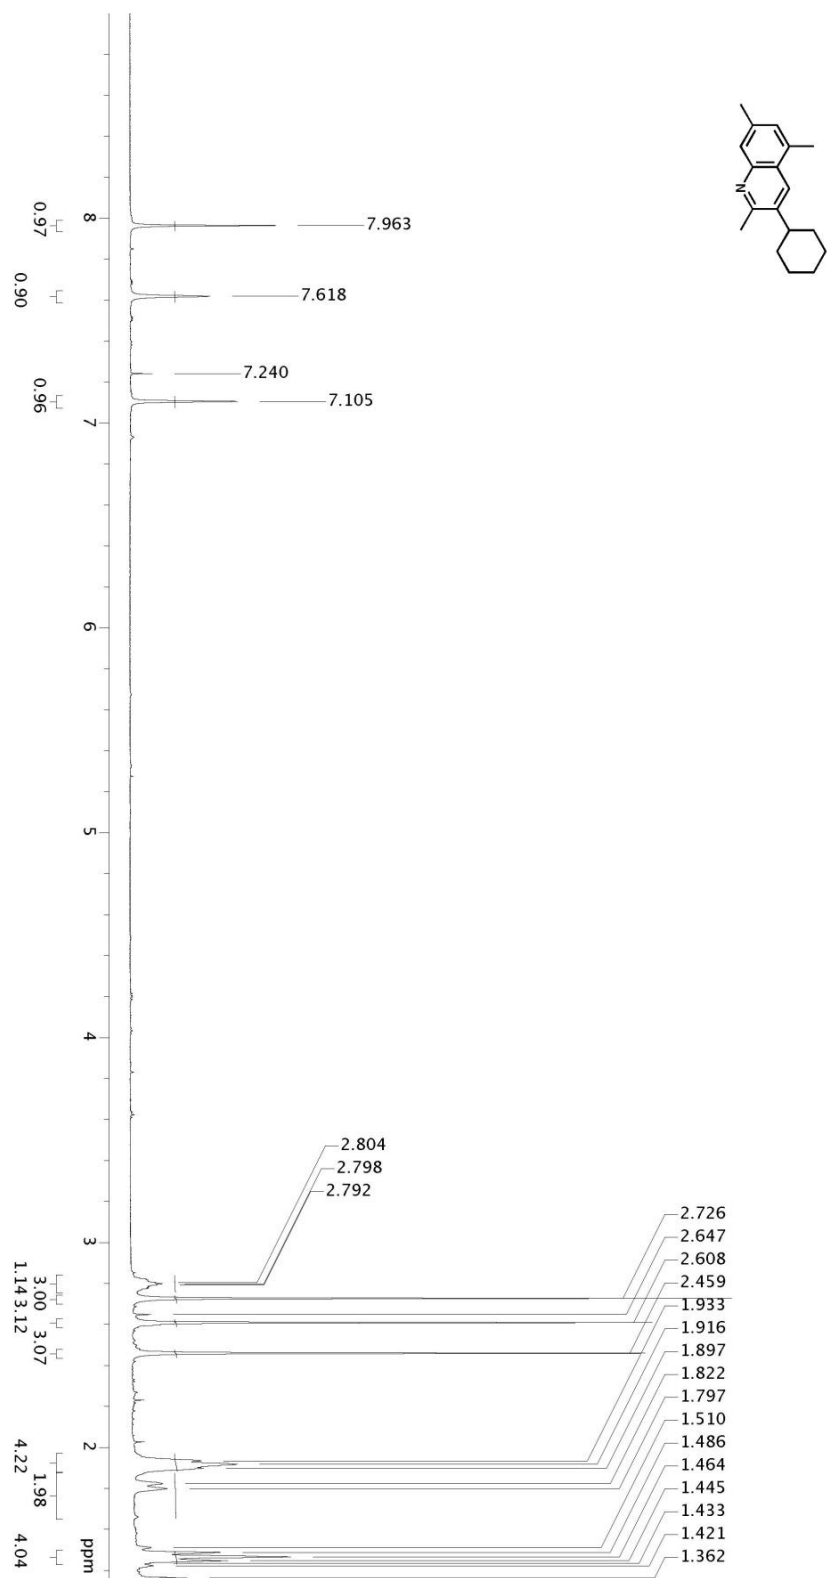

**Figure S17:** <sup>1</sup>H NMR spectrum for compound, 3-cyclohexyl-2,5,7-trimethylquinoline.  
(AD109, Quinoline 11)

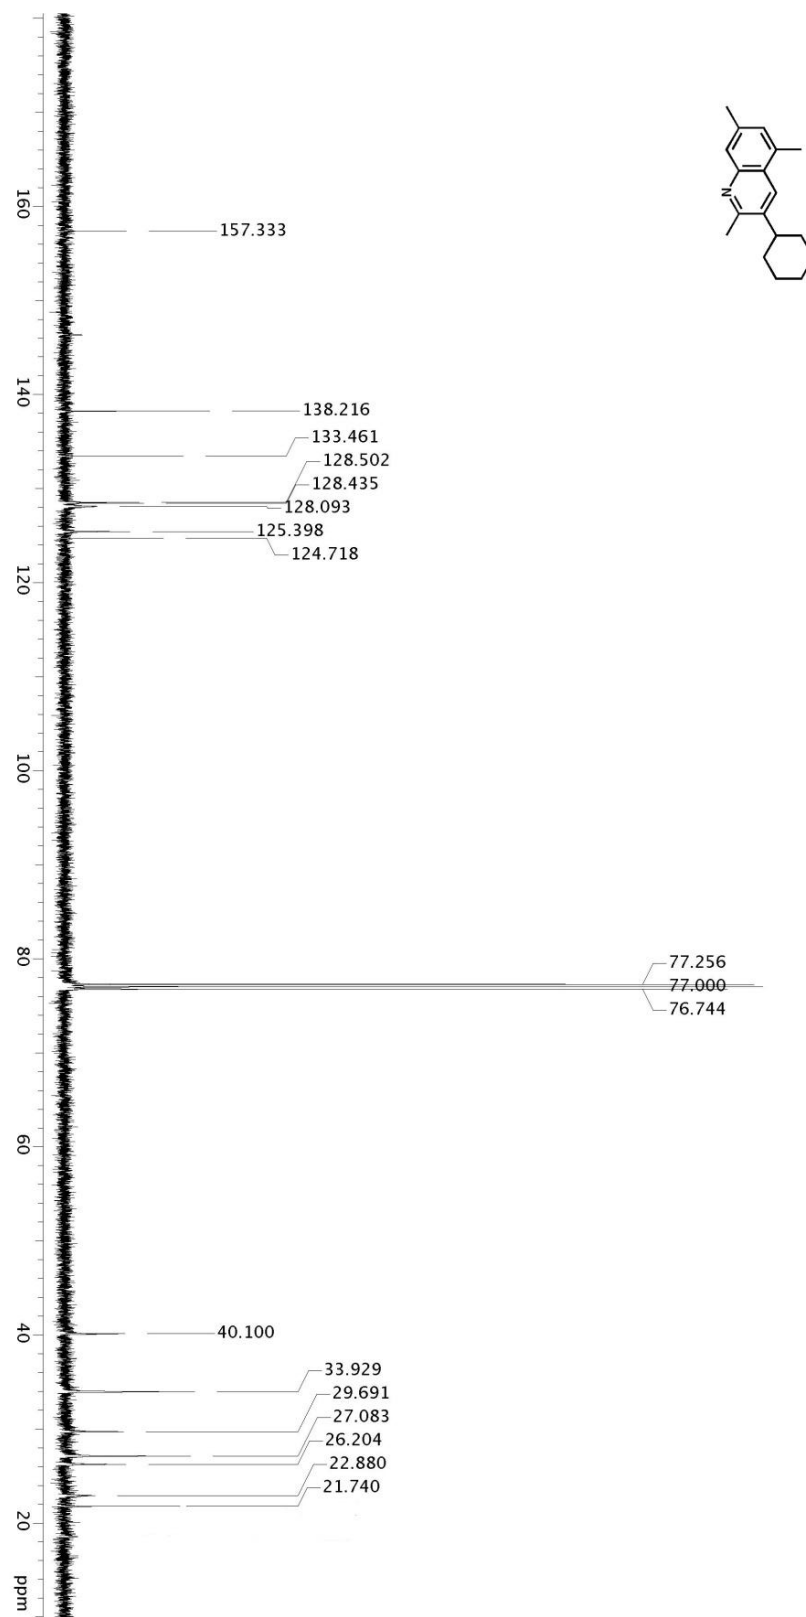

**Figure S18:**  $^{13}\text{C}$  NMR spectrum for compound, 3-cyclohexyl-2,5,7-trimethylquinoline.  
(AD109, Quinoline 11)

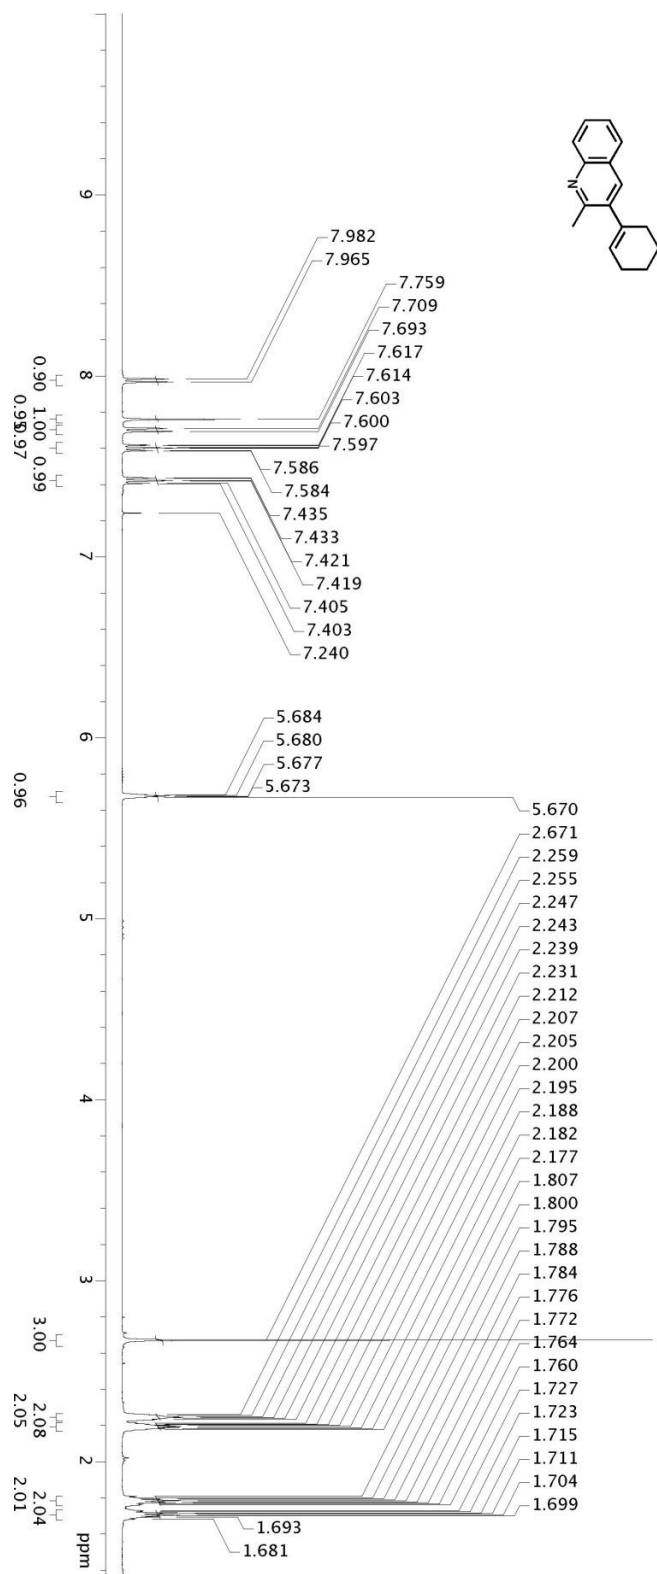

**Figure S19:** <sup>1</sup>H NMR spectrum for compound 3-cyclohexenyl-2-methylquinoline.  
(AD100, Quinoline 13).

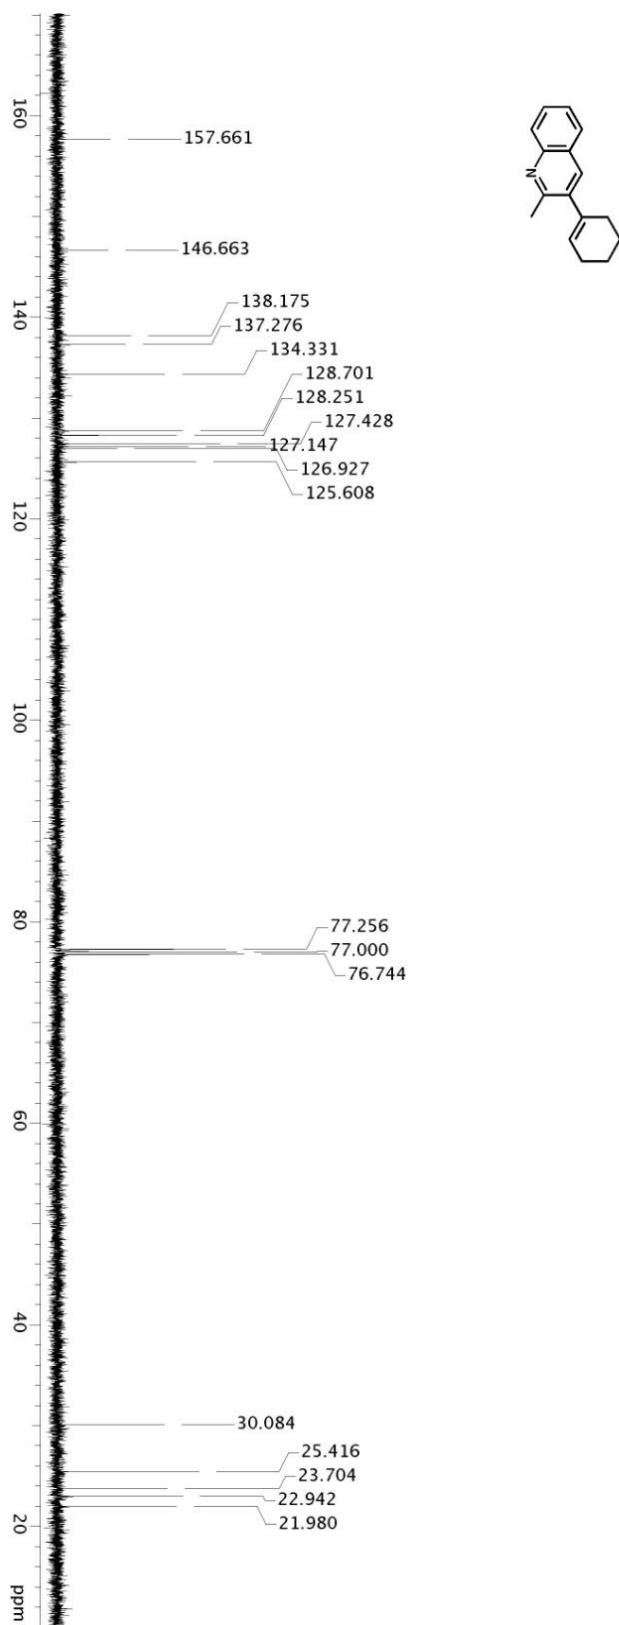

**Figure S20:**  $^{13}\text{C}$  NMR spectrum for compound 3-cyclohexenyl-2-methylquinoline.  
(AD100, Quinoline 13)



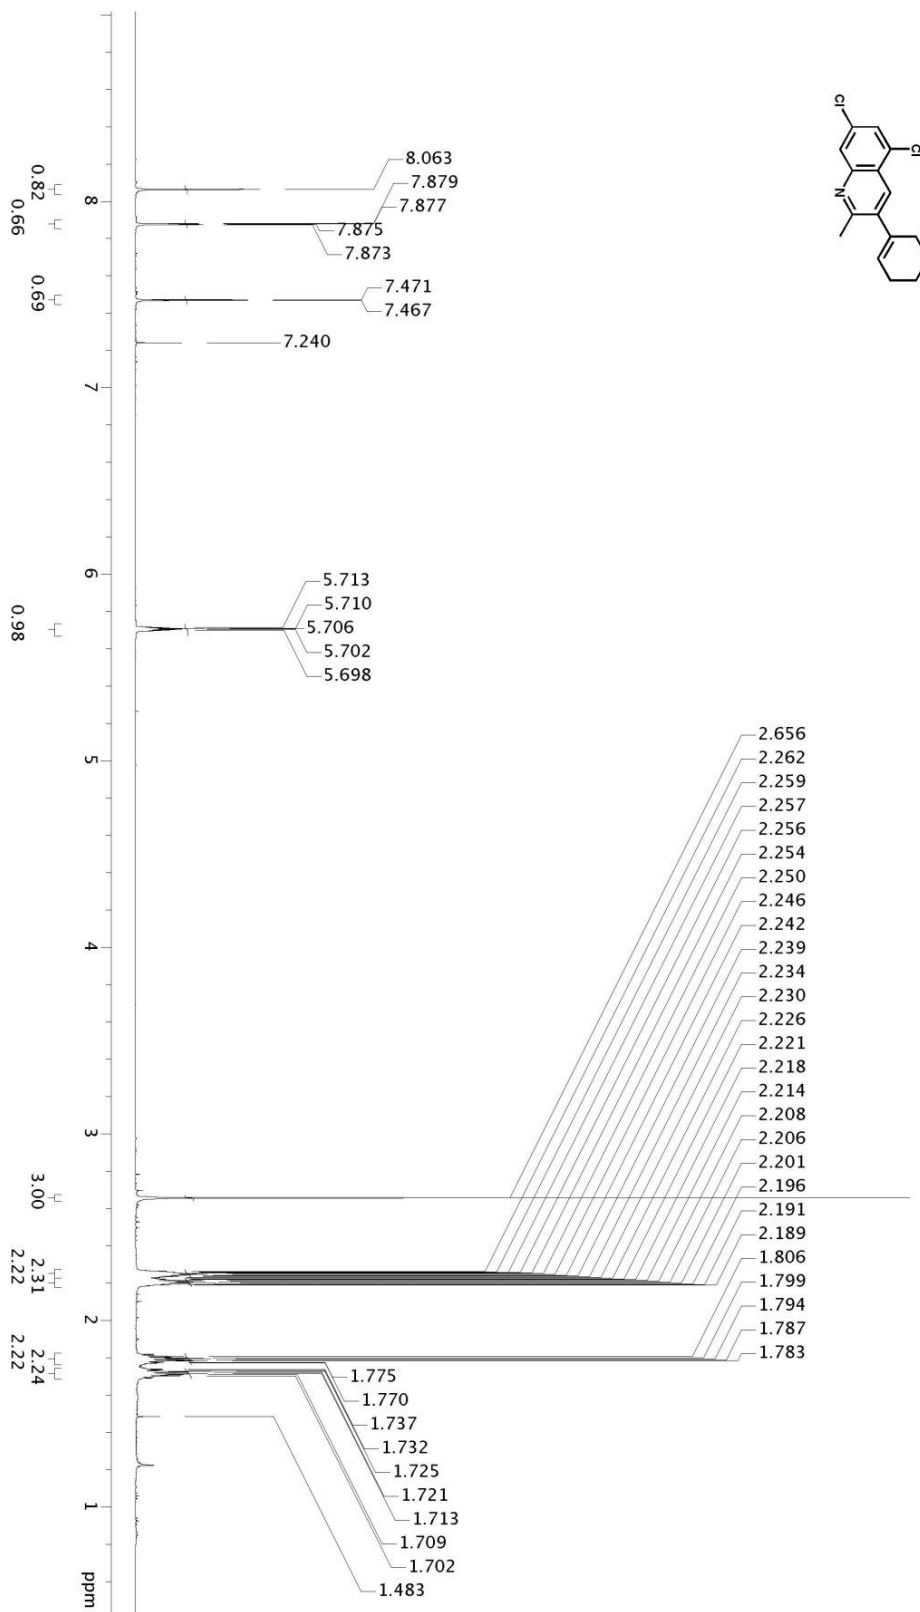

**Figure S21:** <sup>1</sup>H NMR spectrum for compound 5,7-dichloro-3-cyclohexenyl-2-methylquinoline.  
(AD115, Quinoline 14)

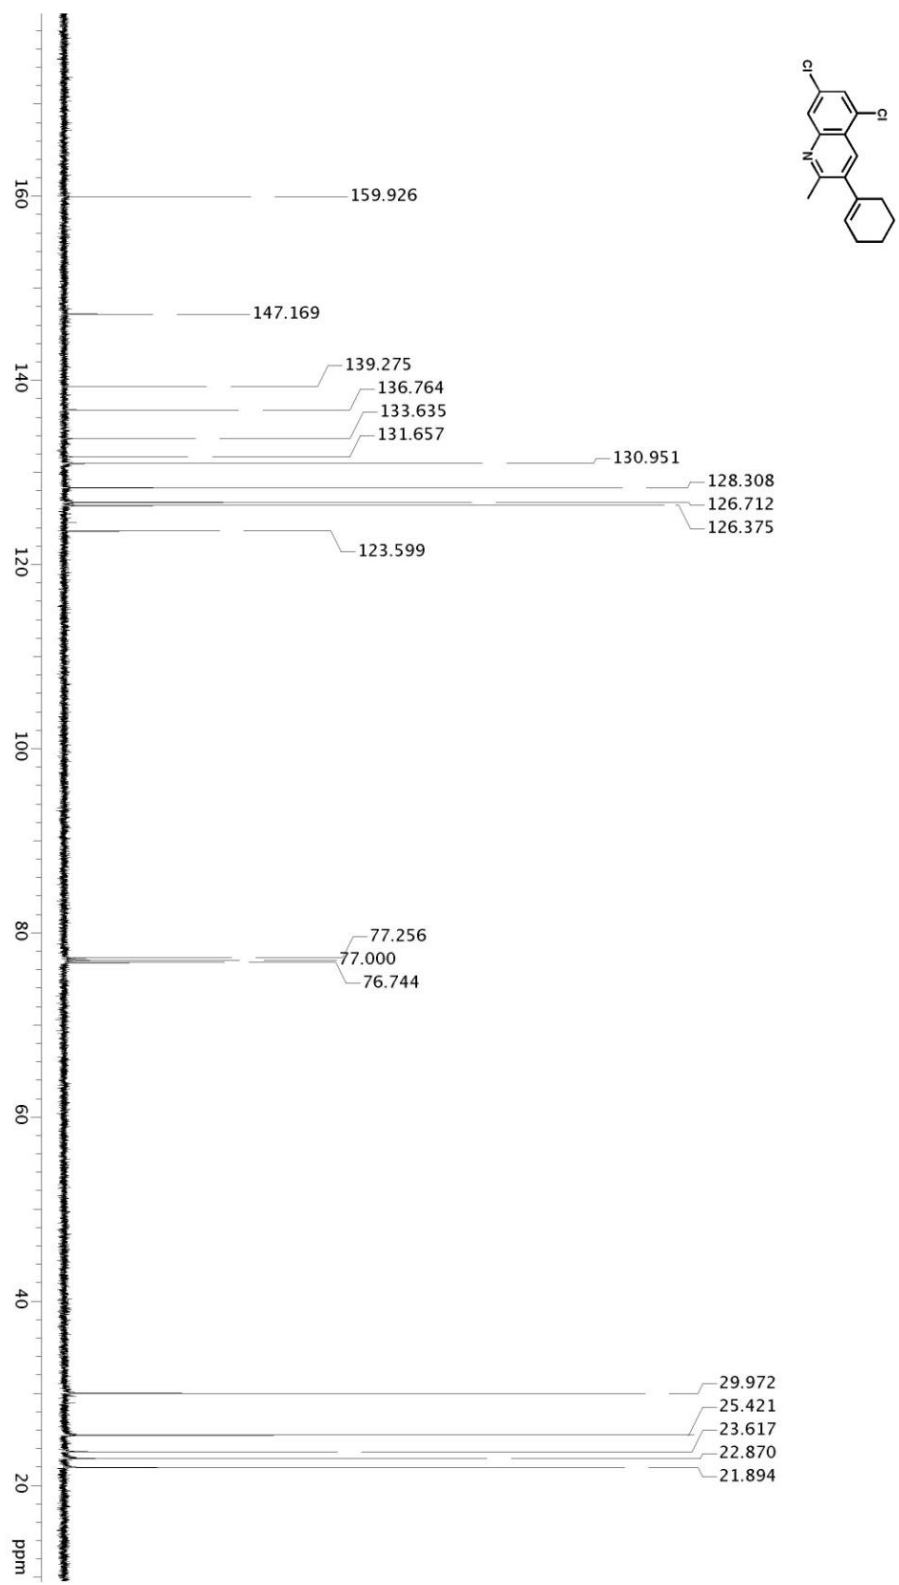

**Figure S22:**  $^{13}\text{C}$  NMR spectrum for compound 5,7-dichloro-3-cyclohexenyl-2-methylquinoline. (AD115, Quinoline 14)

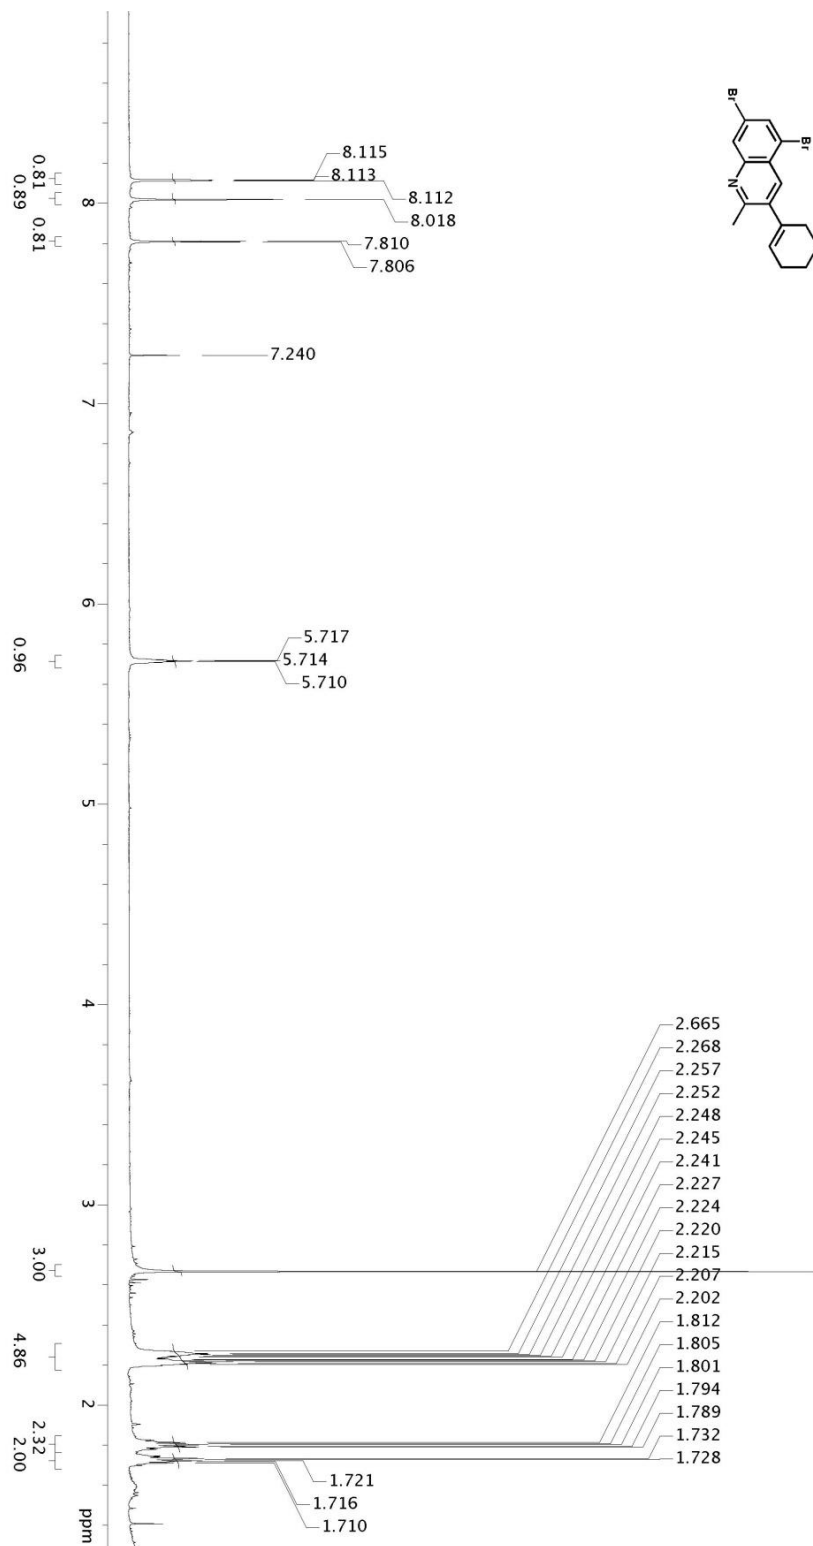

**Figure S23.** <sup>1</sup>H NMR spectrum for compound 5,7-dibromo-3-cyclohexenyl-2-methylquinoline. (AD116, Quinoline 15)

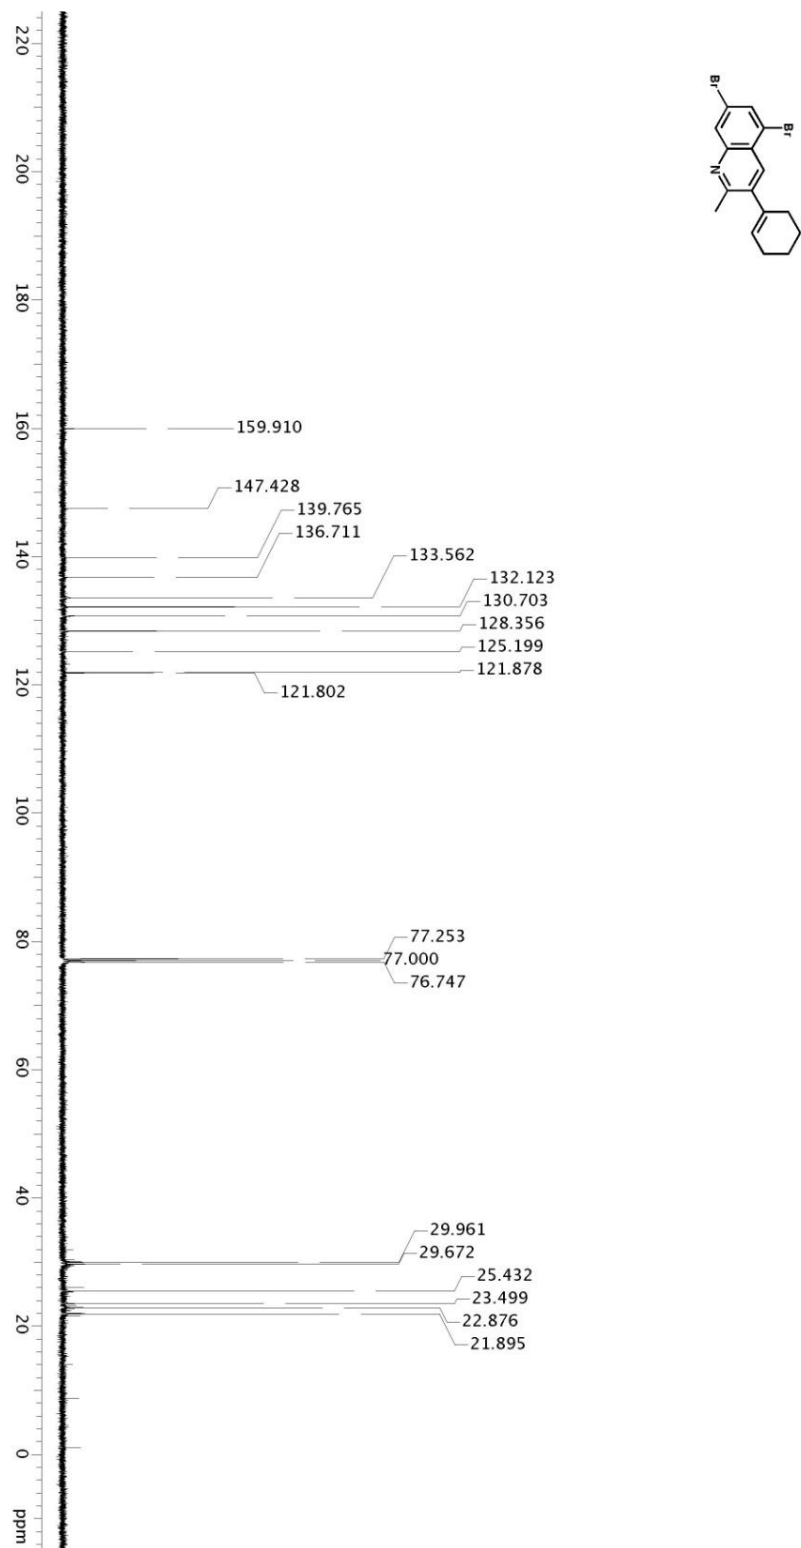

**Figure S24:**  $^{13}\text{C}$  NMR spectrum for compound 5,7-dibromo-3-cyclohexenyl-2-methylquinoline.  
(AD116, Quinoline 15)

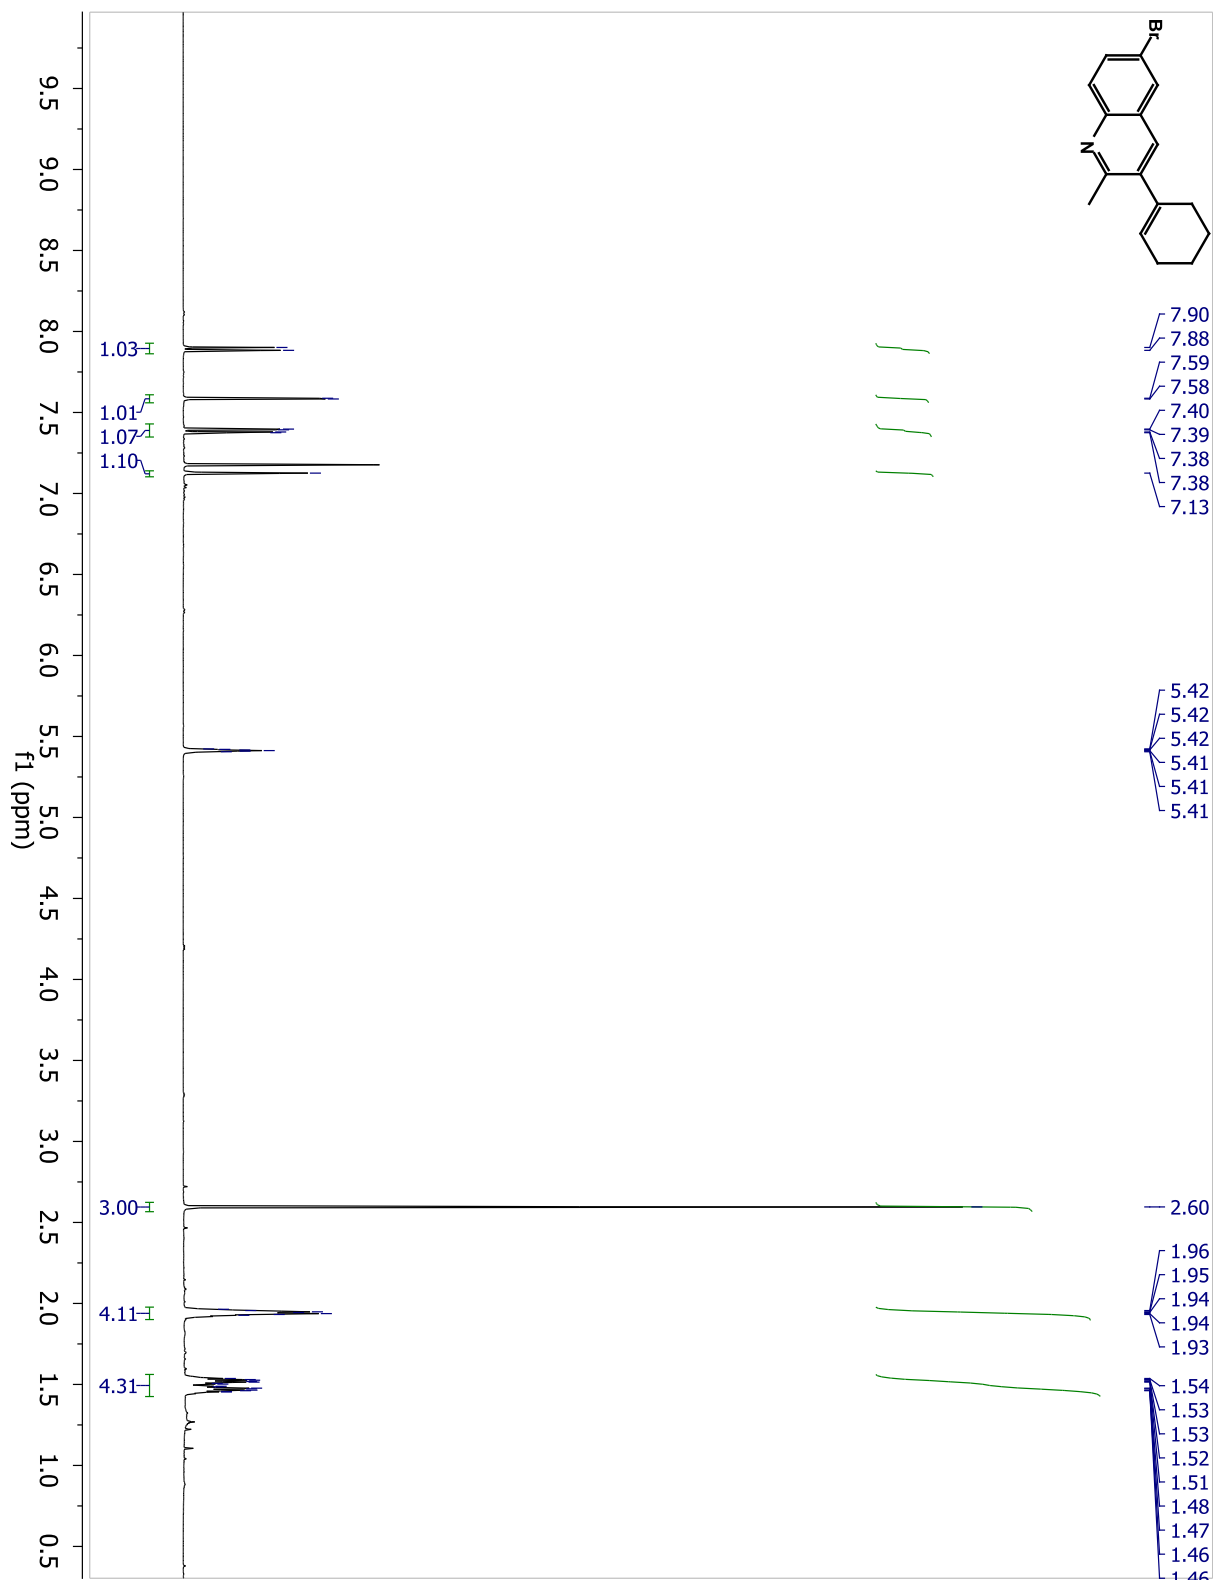

**Figure S25:**  $^1\text{H}$  NMR spectrum for compound 6-bromo-3-cyclohexenyl-2-methylquinoline.  
(TM127, Quinoline 16)

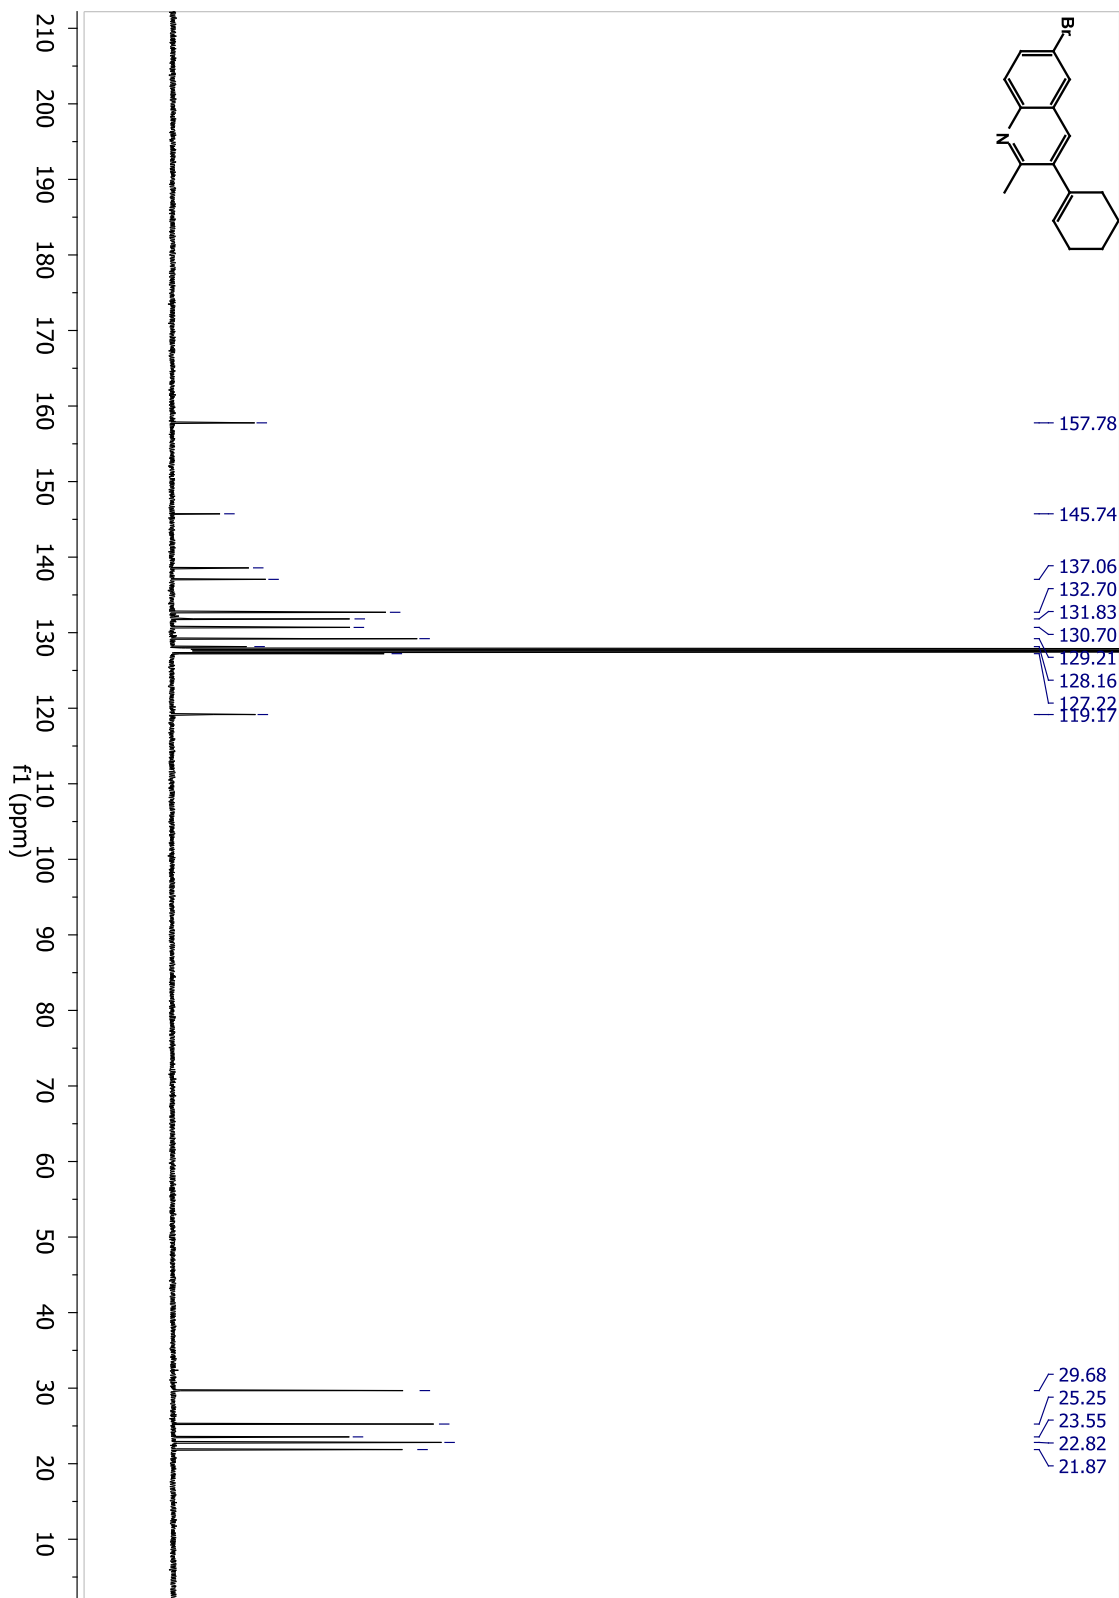

**Figure S26:**  $^{13}\text{C}$  NMR spectrum for compound 6-bromo-3-cyclohexenyl-2-methylquinoline.  
(TM127, Quinoline 16)

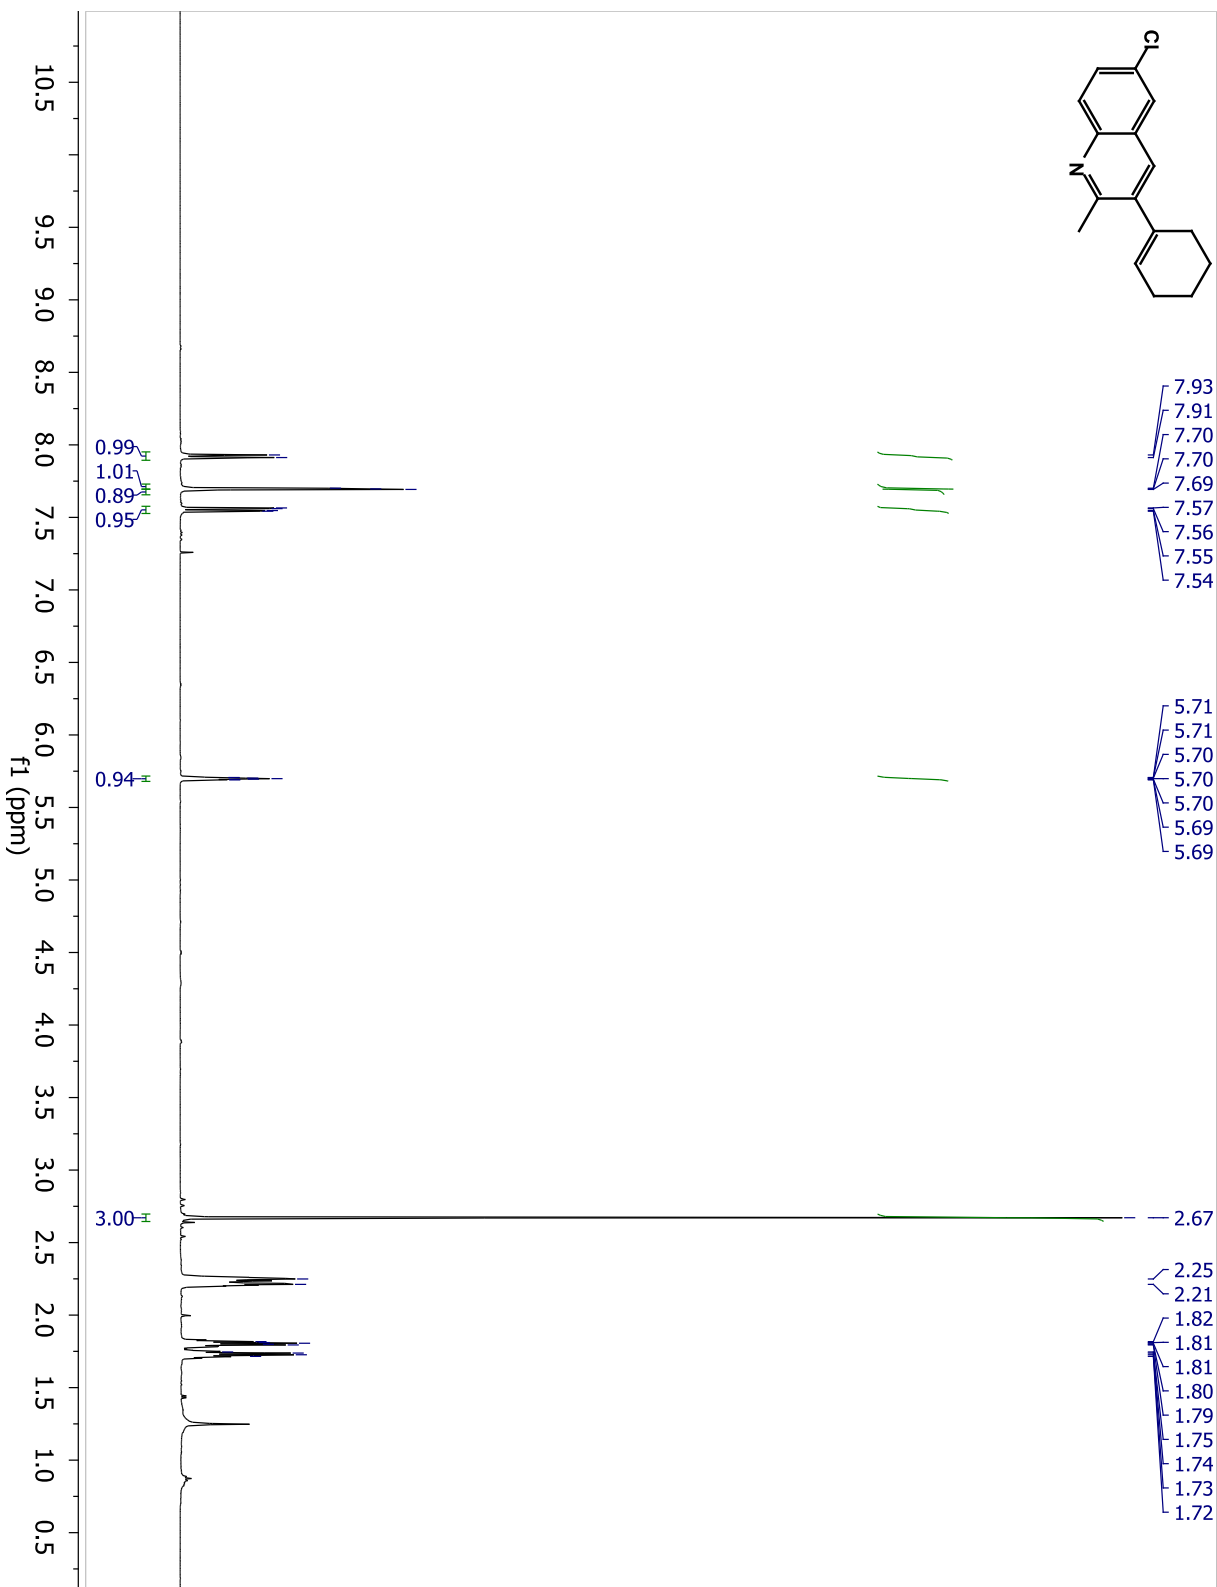

**Figure S27:** <sup>1</sup>H NMR spectrum for compound 6-chloro-3-cyclohexenyl-2-methylquinoline.  
(TM-125, Quinoline 17)

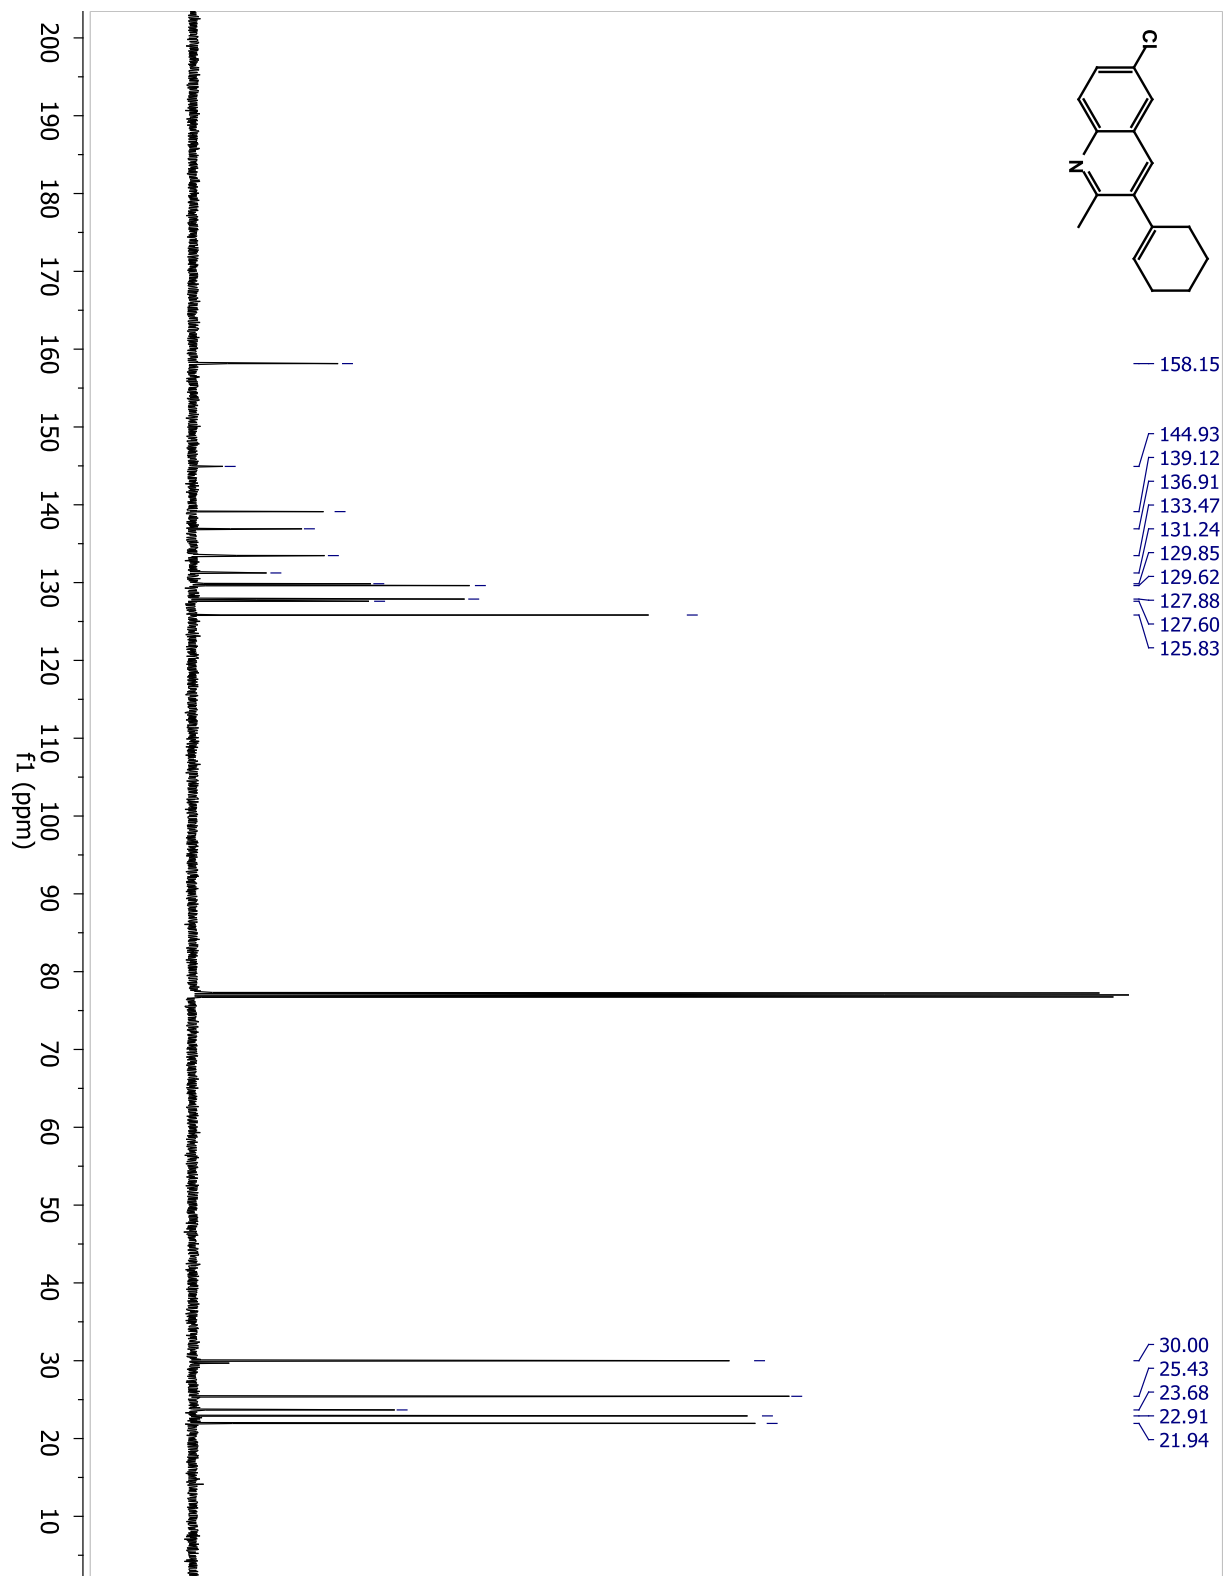

**Figure S28:**  $^{13}\text{C}$  NMR spectrum for compound 6-chloro-3-cyclohexenyl-2-methylquinoline.  
(TM-125, Quinoline 17)



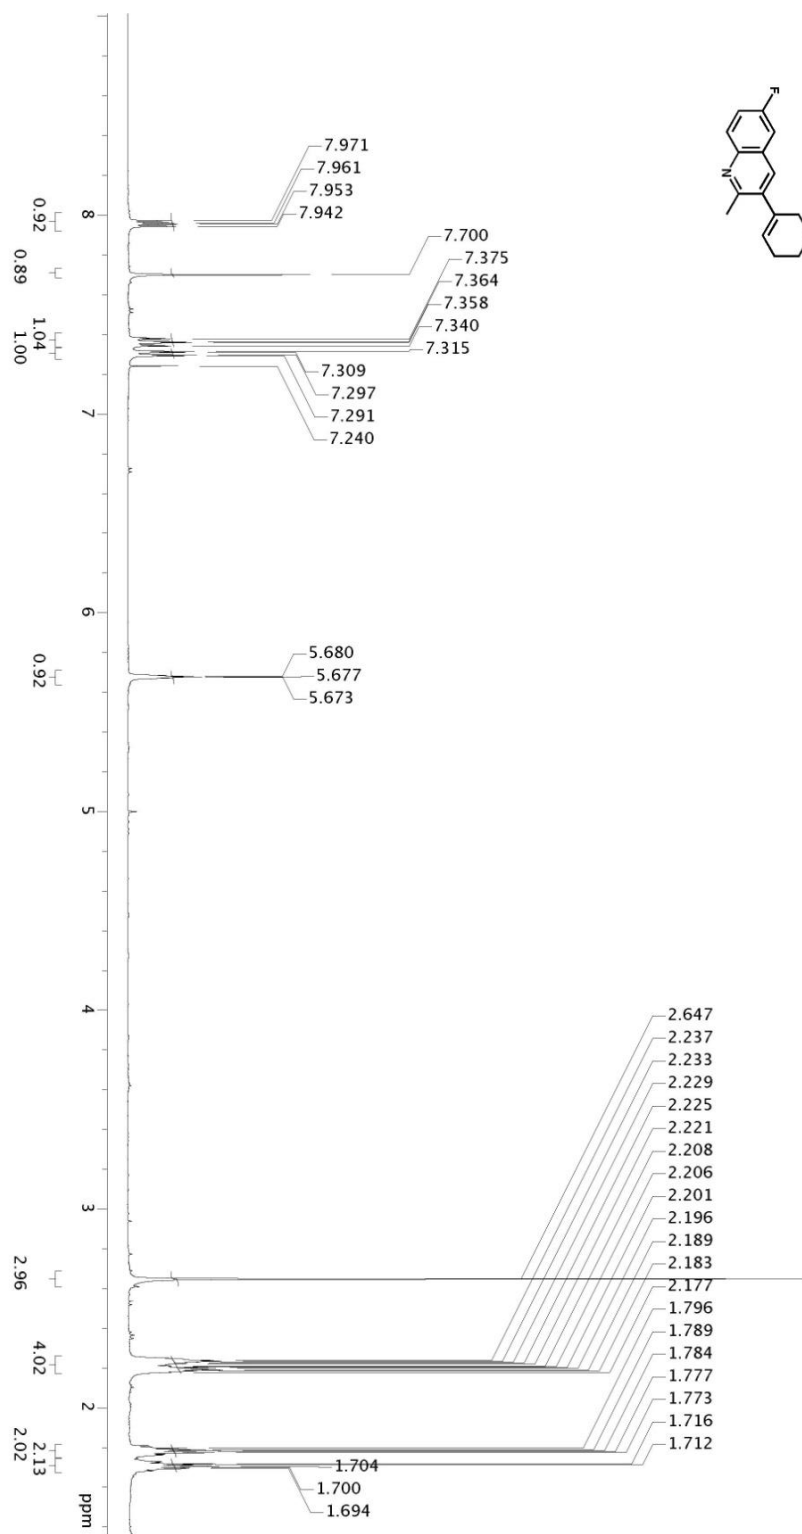

**Figure S29:** <sup>1</sup>H NMR spectrum for compound 3-cyclohexenyl-6-fluoro-2-methylquinoline.  
(AD118, Quinoline 18).

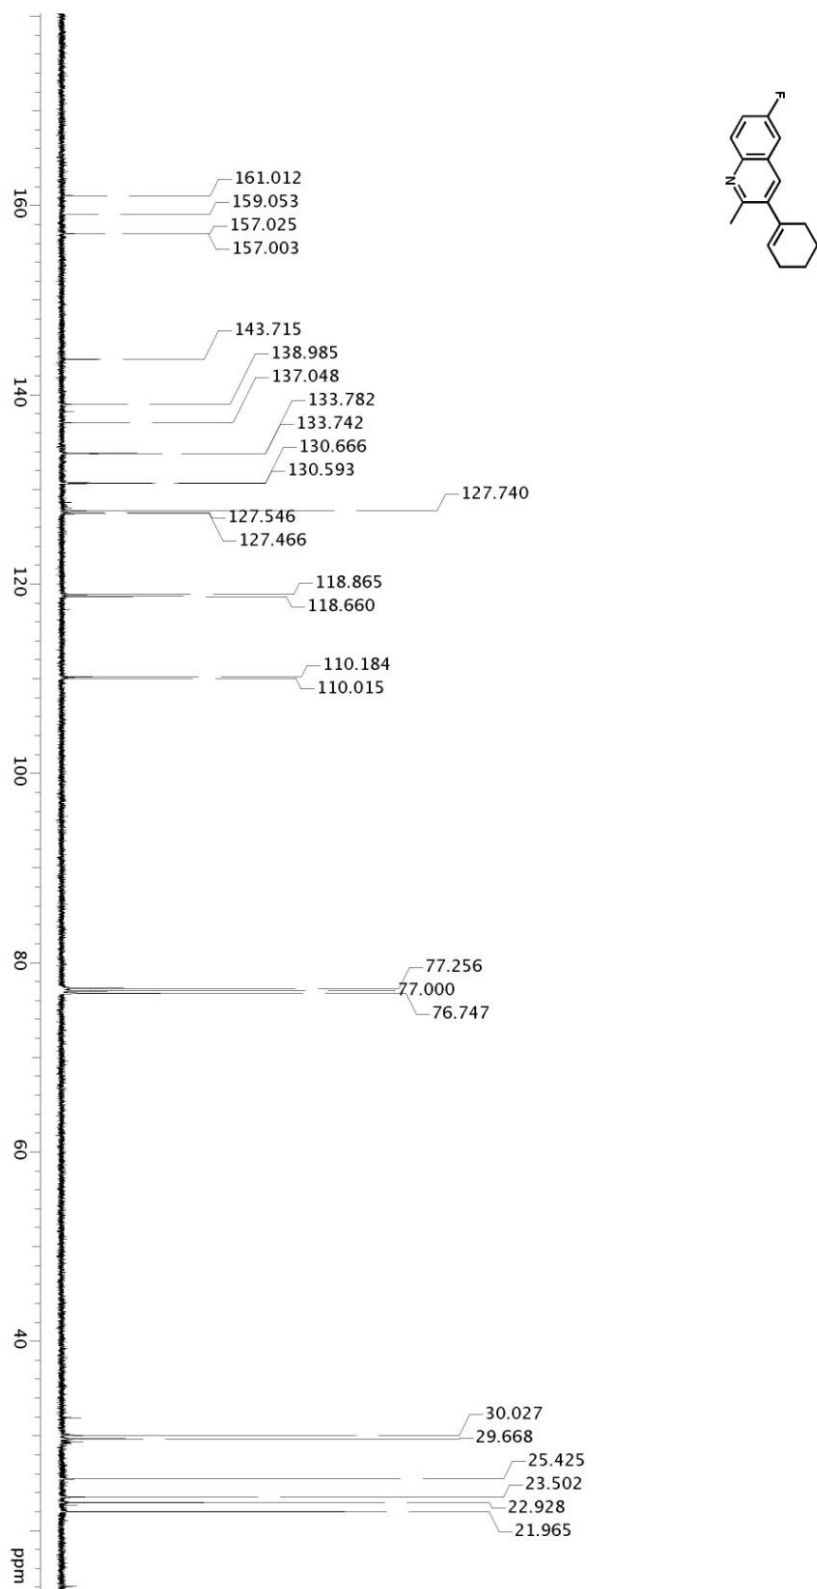

**Figure S30:** <sup>13</sup>C NMR spectrum for compound 3-cyclohexenyl-6-fluoro-2-methylquinoline. (AD118, Quinoline 18).

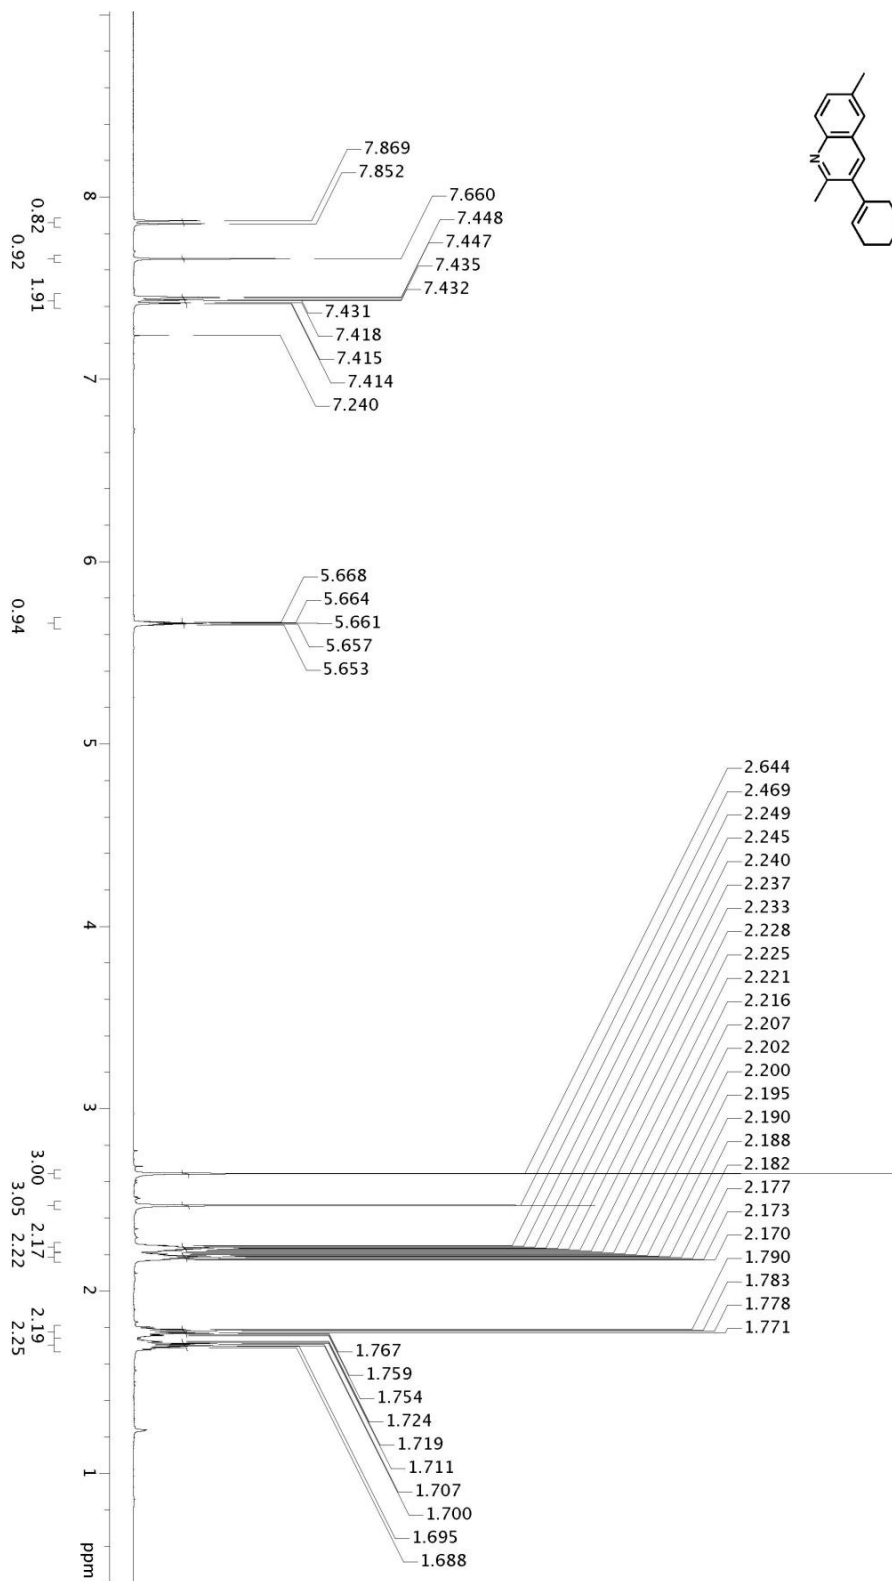

**Figure S31:** <sup>1</sup>H NMR spectrum for compound 3-cyclohexenyl-2,6-dimethylquinoline.  
(AD113, Quinoline 19)

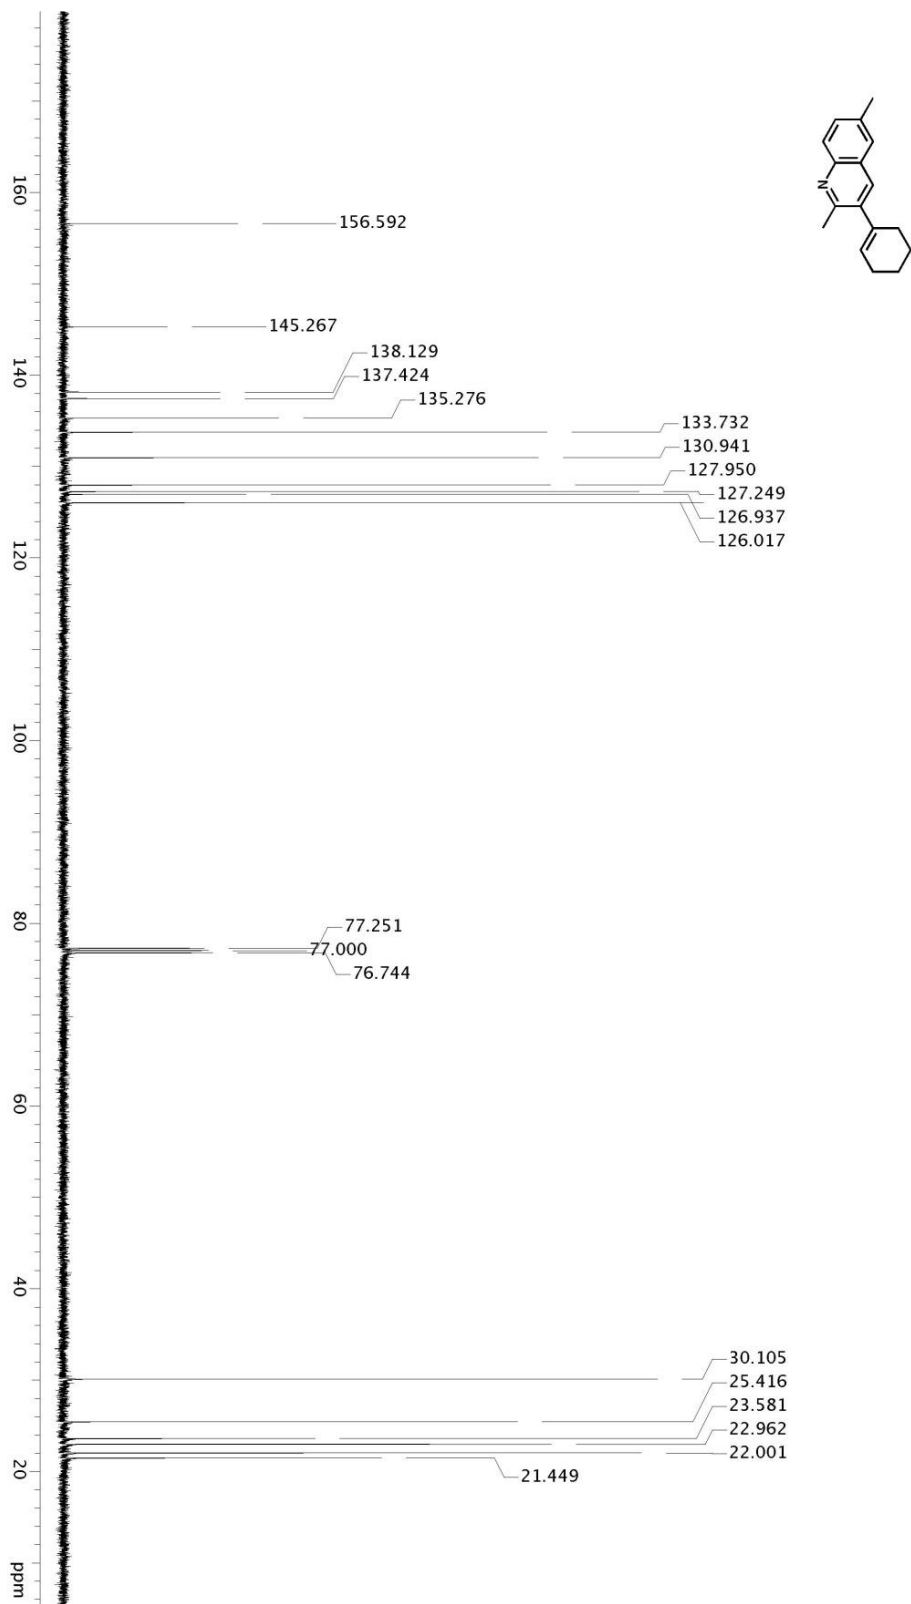

**Figure S32:**  $^{13}\text{C}$  NMR spectrum for compound 3-cyclohexenyl-2,6-dimethylquinoline.  
(AD113, Quinoline 19)

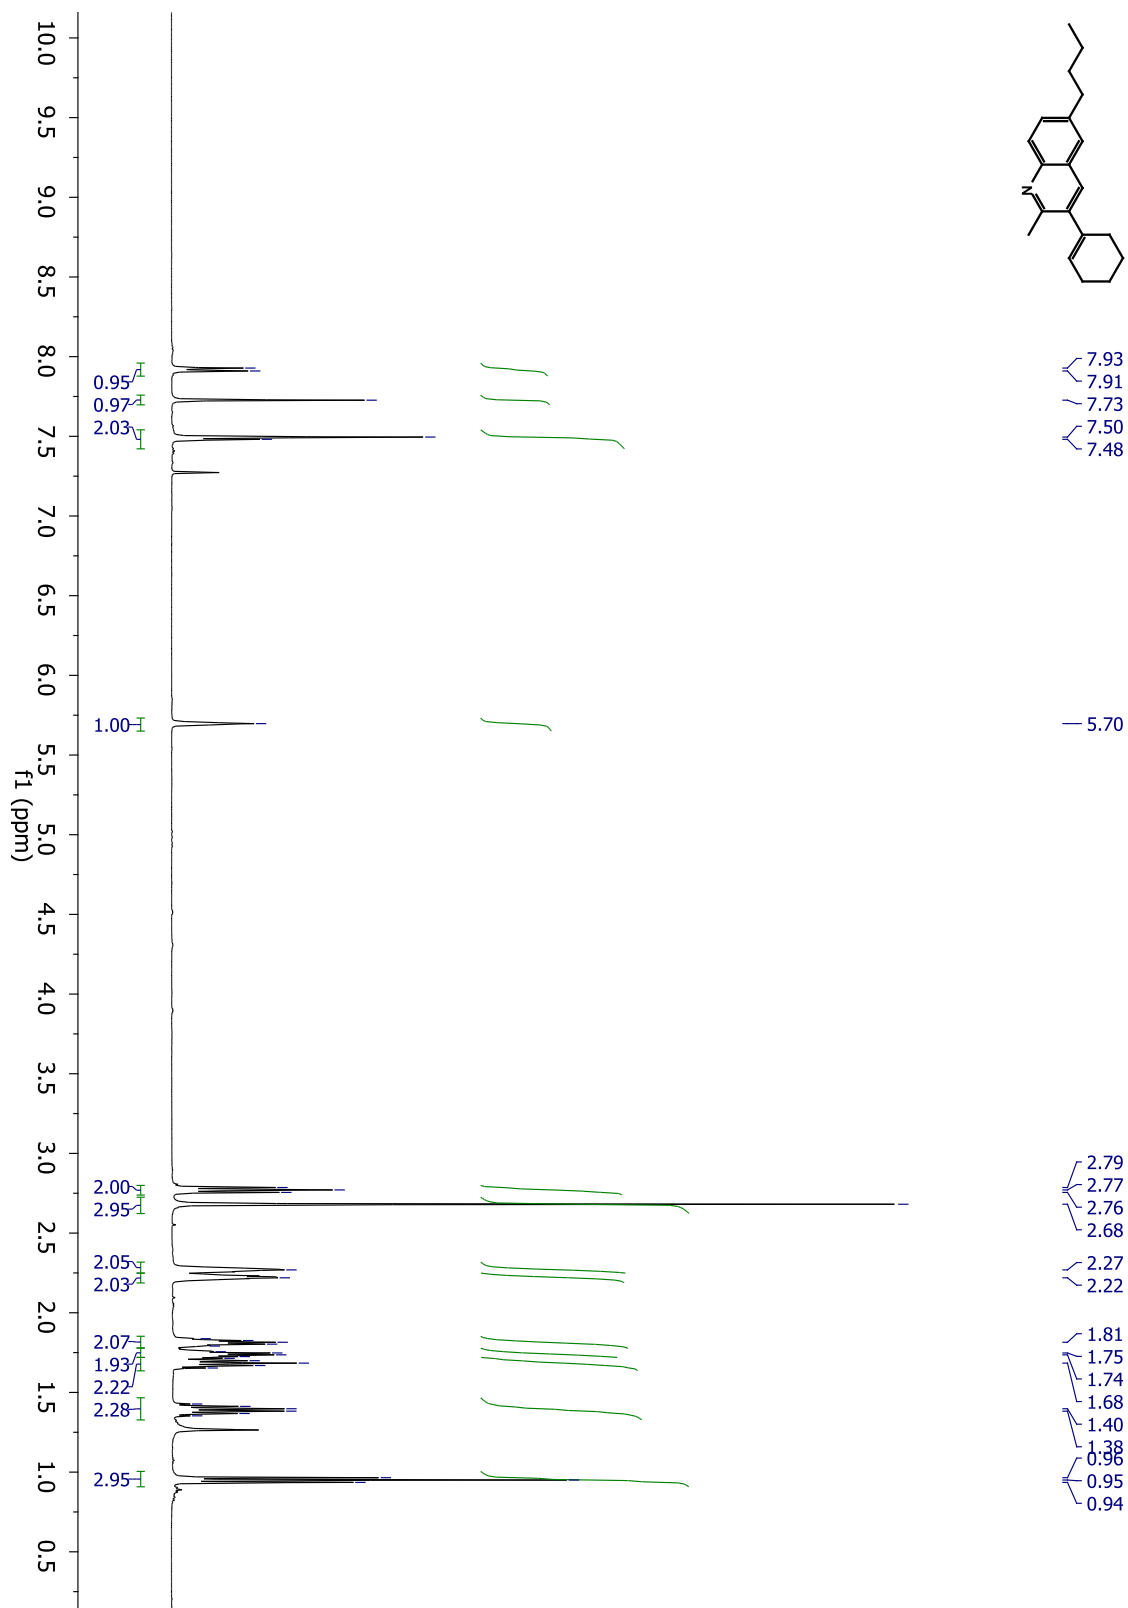

**Figure S33:** <sup>1</sup>H NMR spectrum for compound 6-butyl-3-cyclohexenyl-2-methylquinoline.  
(TM-113, Quinoline 20)

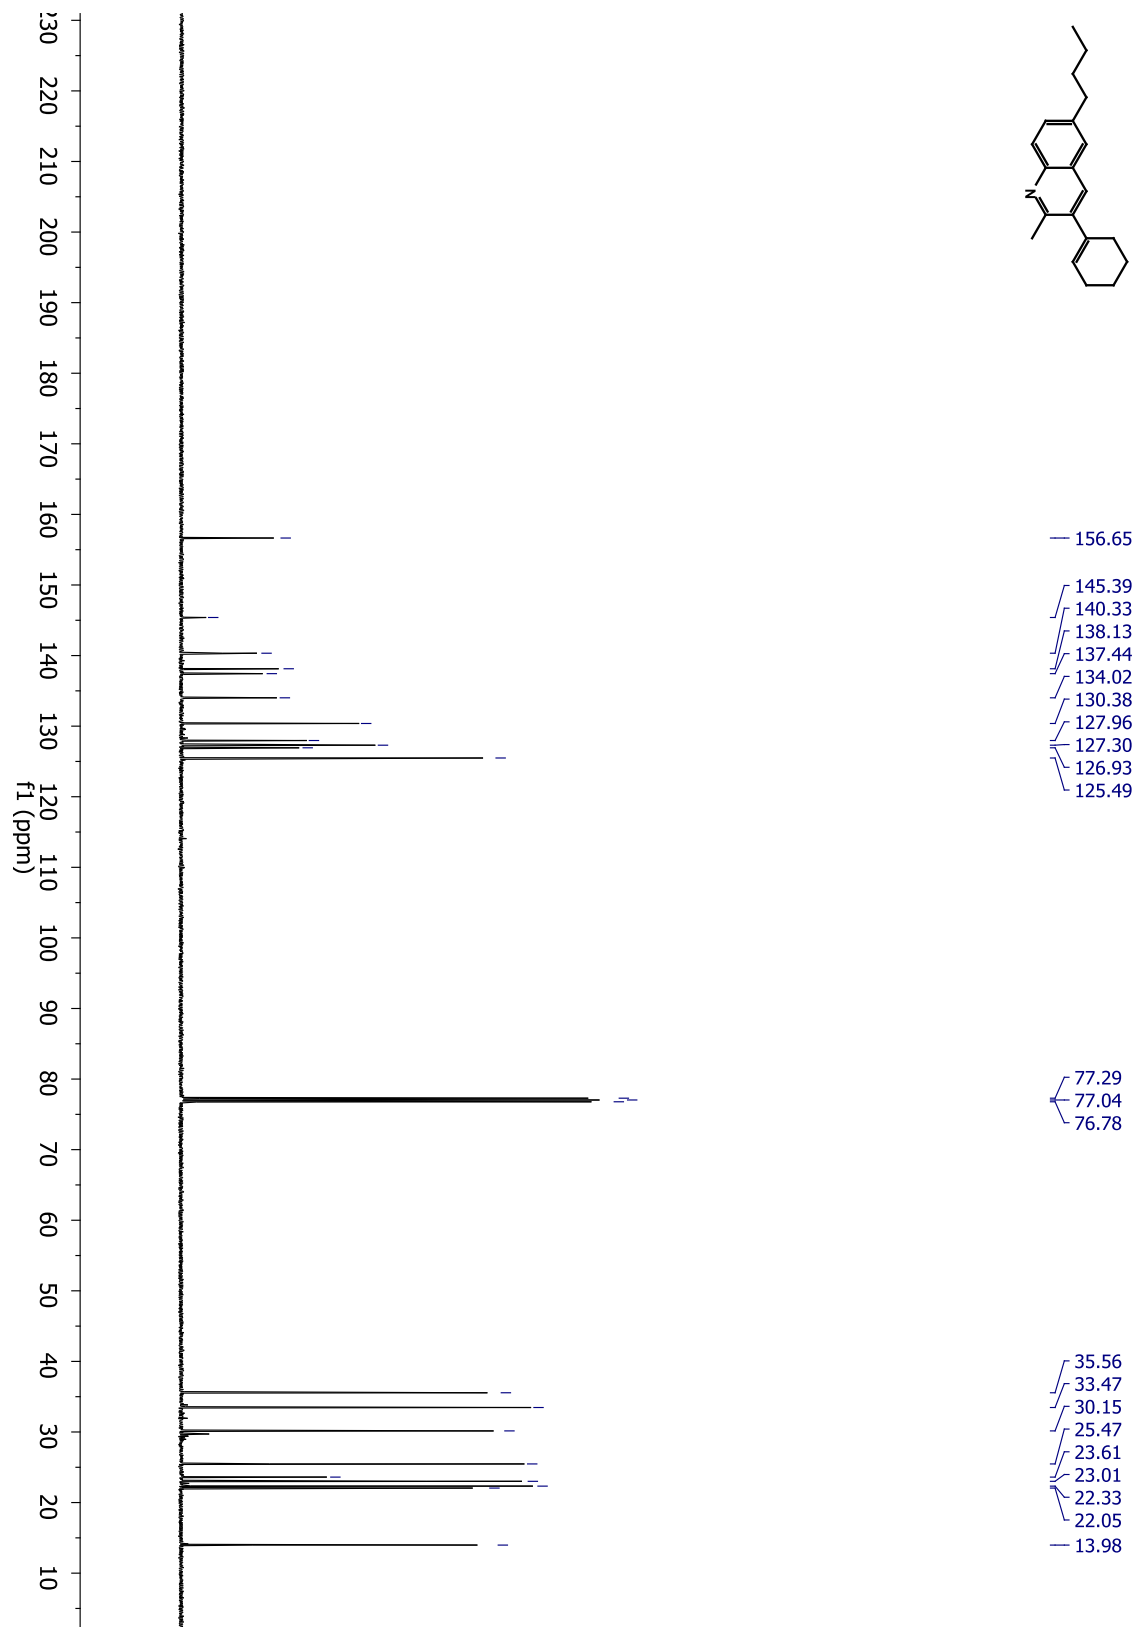

**Figure S34:**  $^{13}\text{C}$  NMR spectrum for compound 6-butyl-3-cyclohexenyl-2-methylquinoline.  
(TM-113, Quinoline 20)

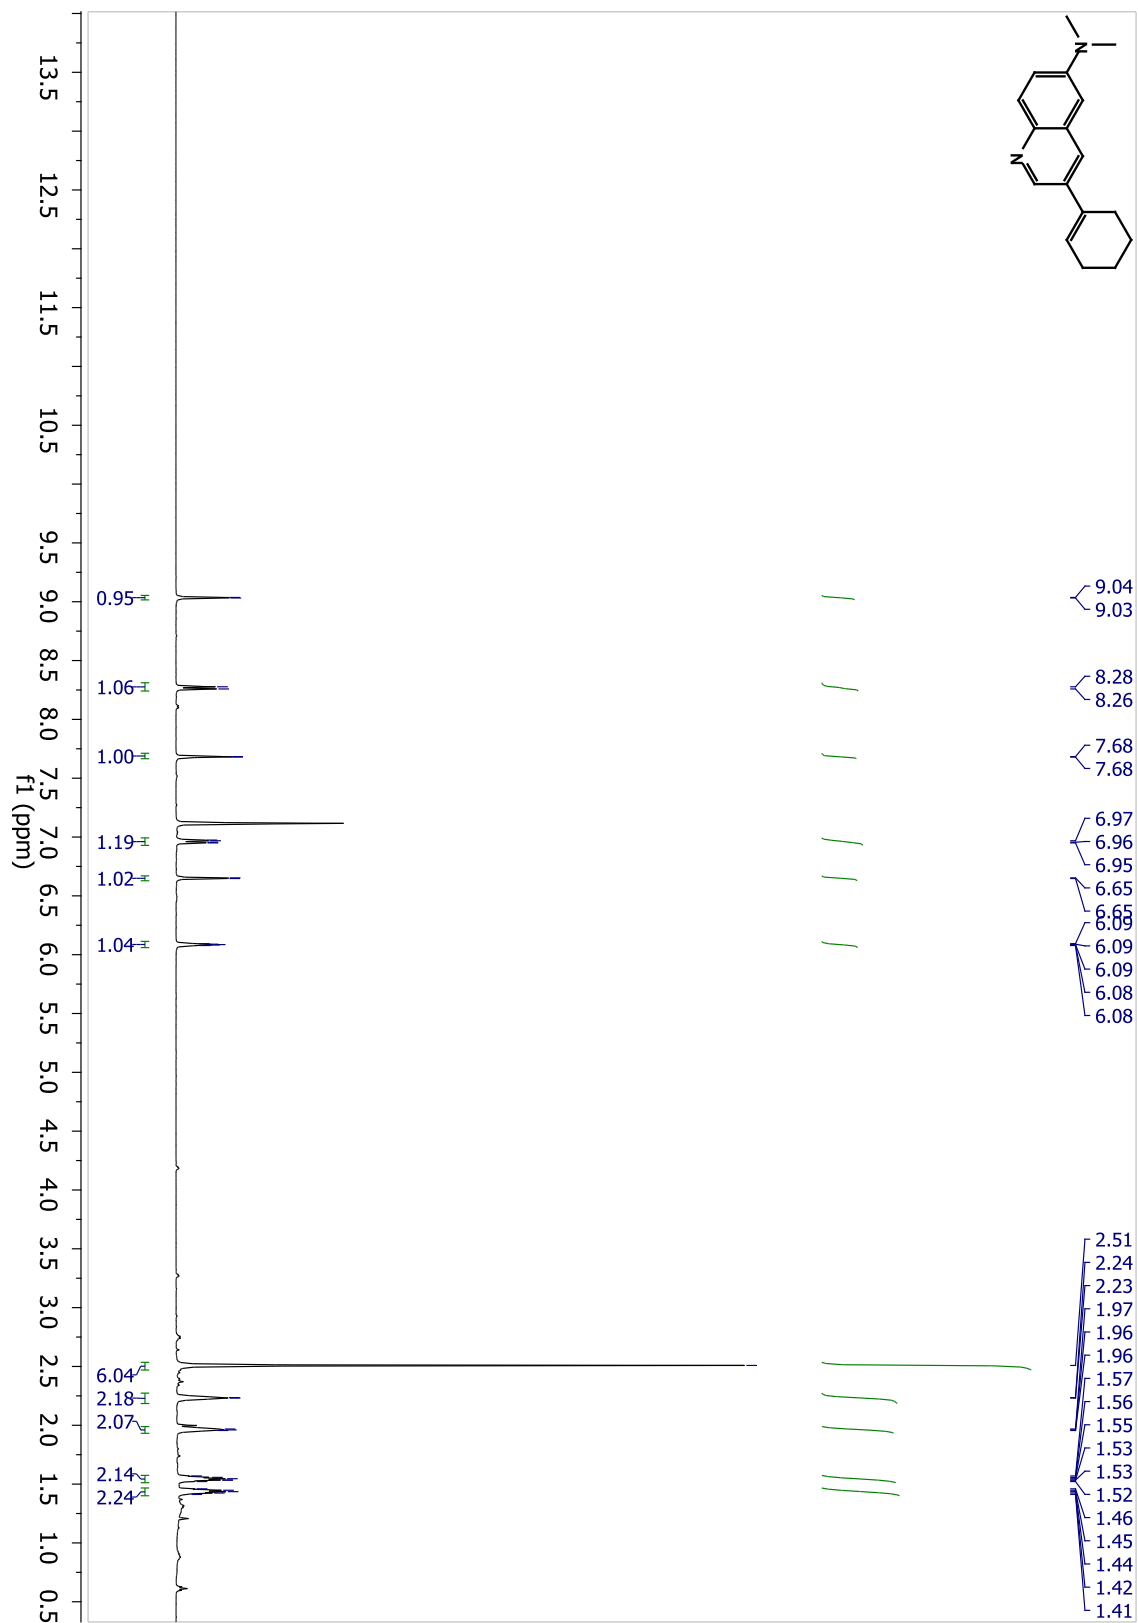

**Figure S35:** <sup>1</sup>H NMR spectrum for compound 3-cyclohexenyl-6-(N,N-dimethylamino)quinoline.  
(TM-101, Quinoline 21)

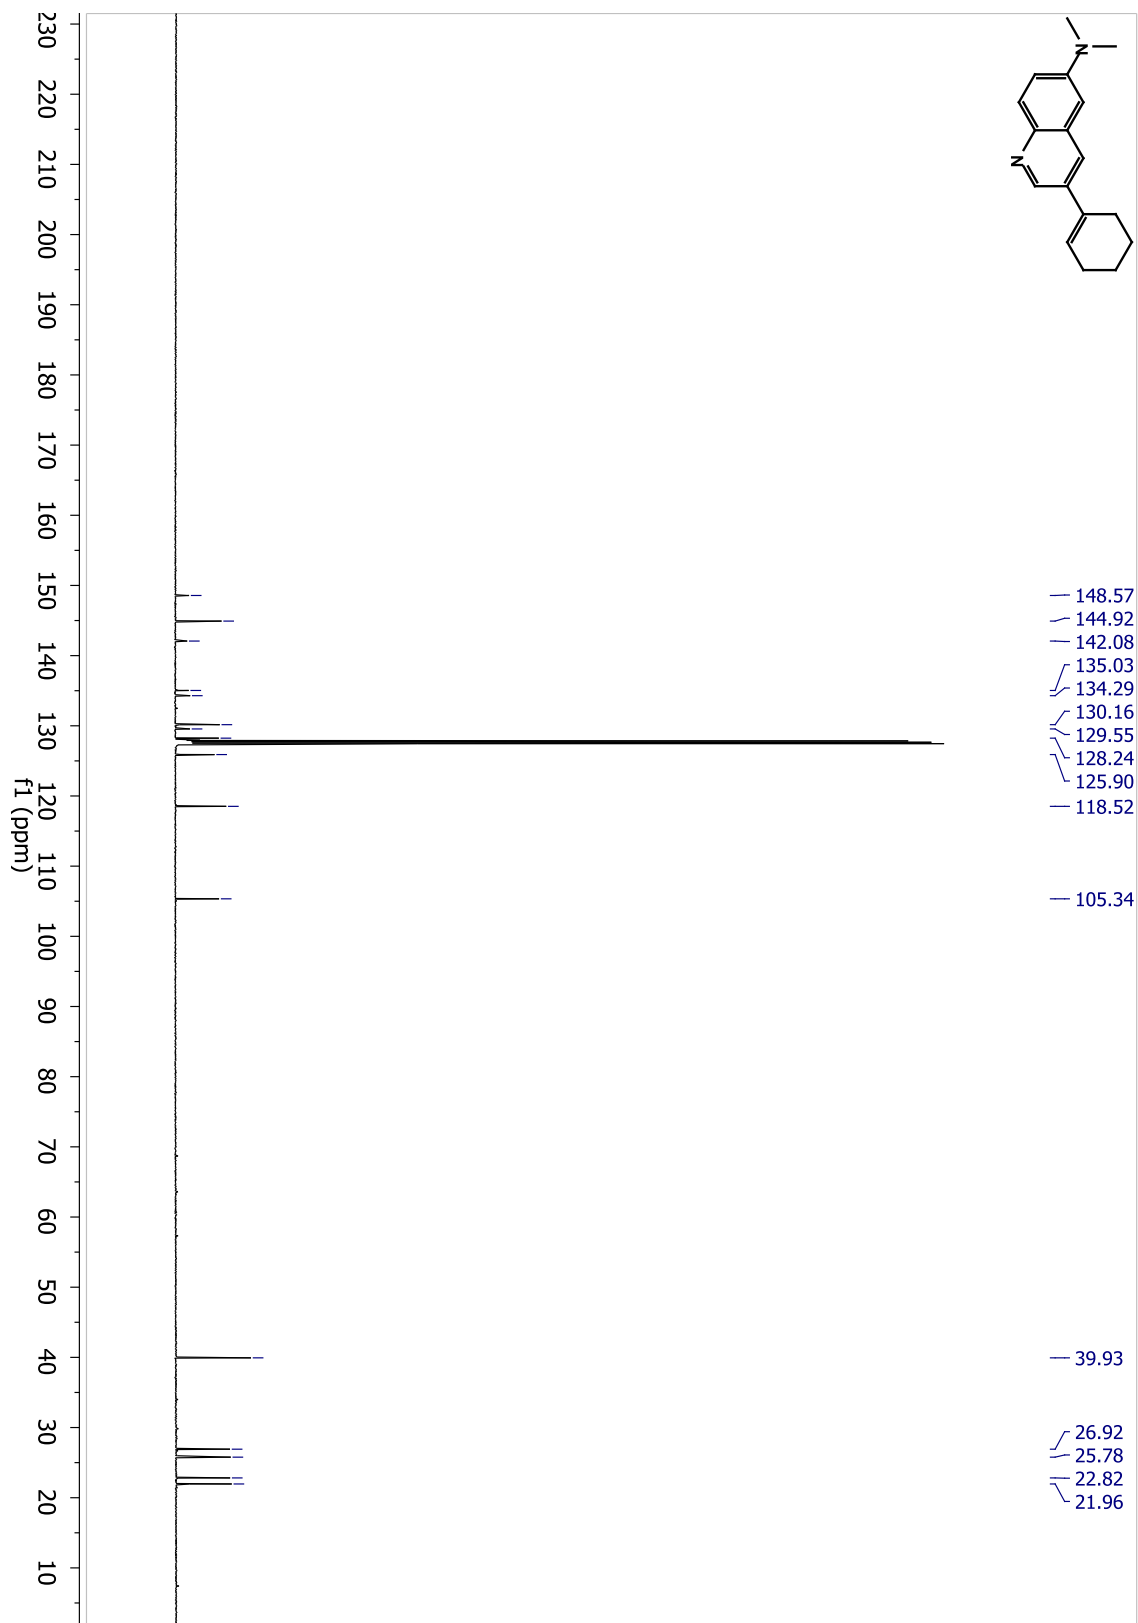

**Figure S36:**  $^{13}\text{C}$  NMR spectrum for compound 3-cyclohexenyl-6-(N,N-dimethylamino)quinoline.  
(TM-101, Quinoline 21)



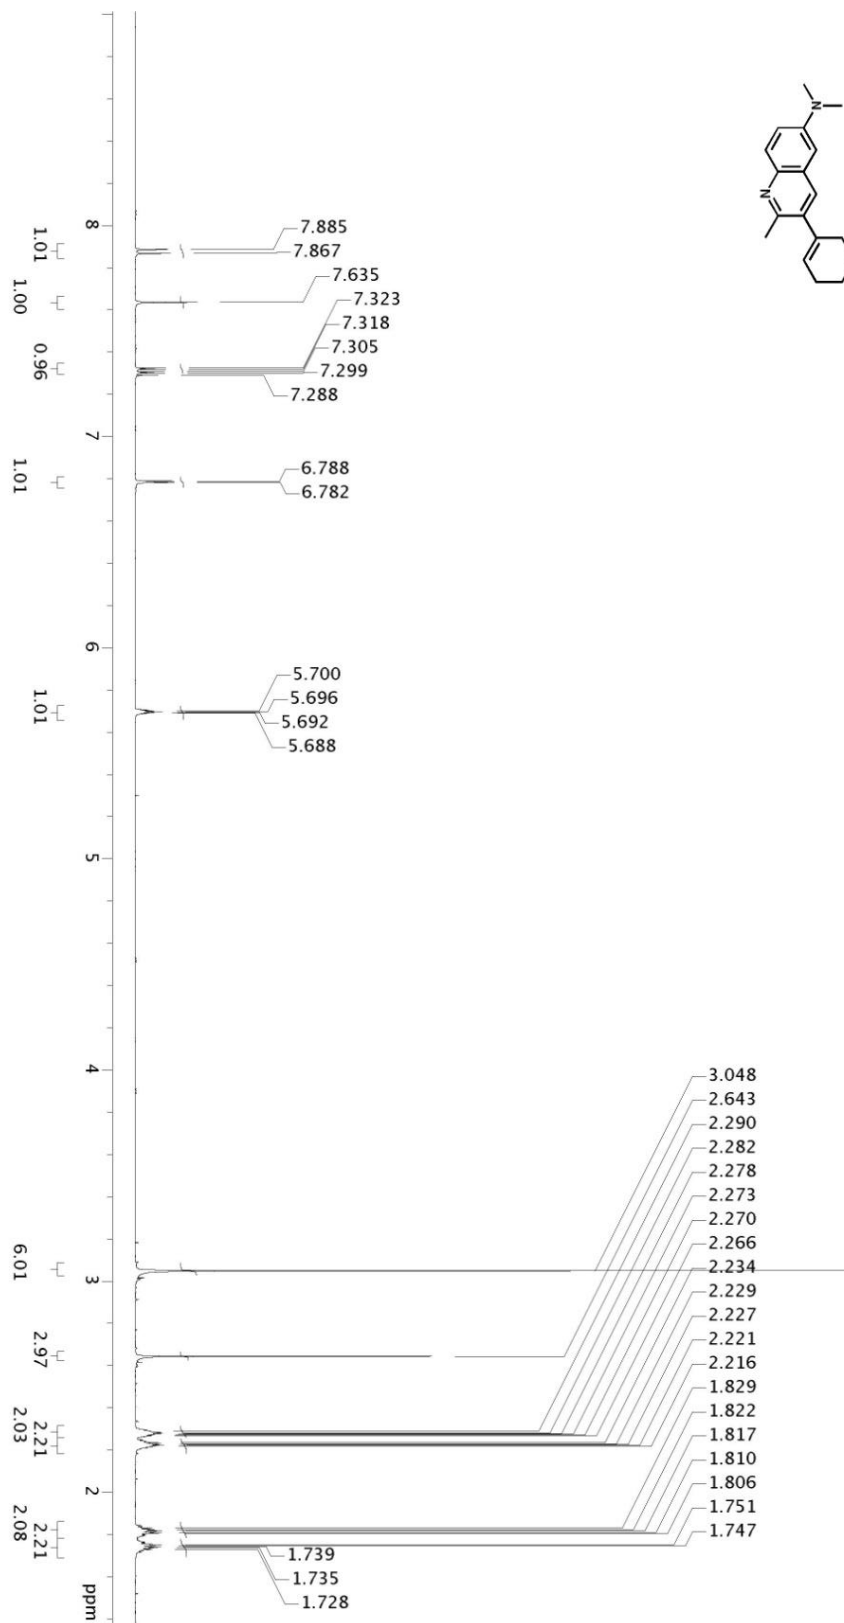

**Figure S37:** <sup>1</sup>H NMR spectrum for compound 3-cyclohexenyl-2-methyl-6-(N,N-dimethylamino)quinoline. (AD117, Quinoline 22):

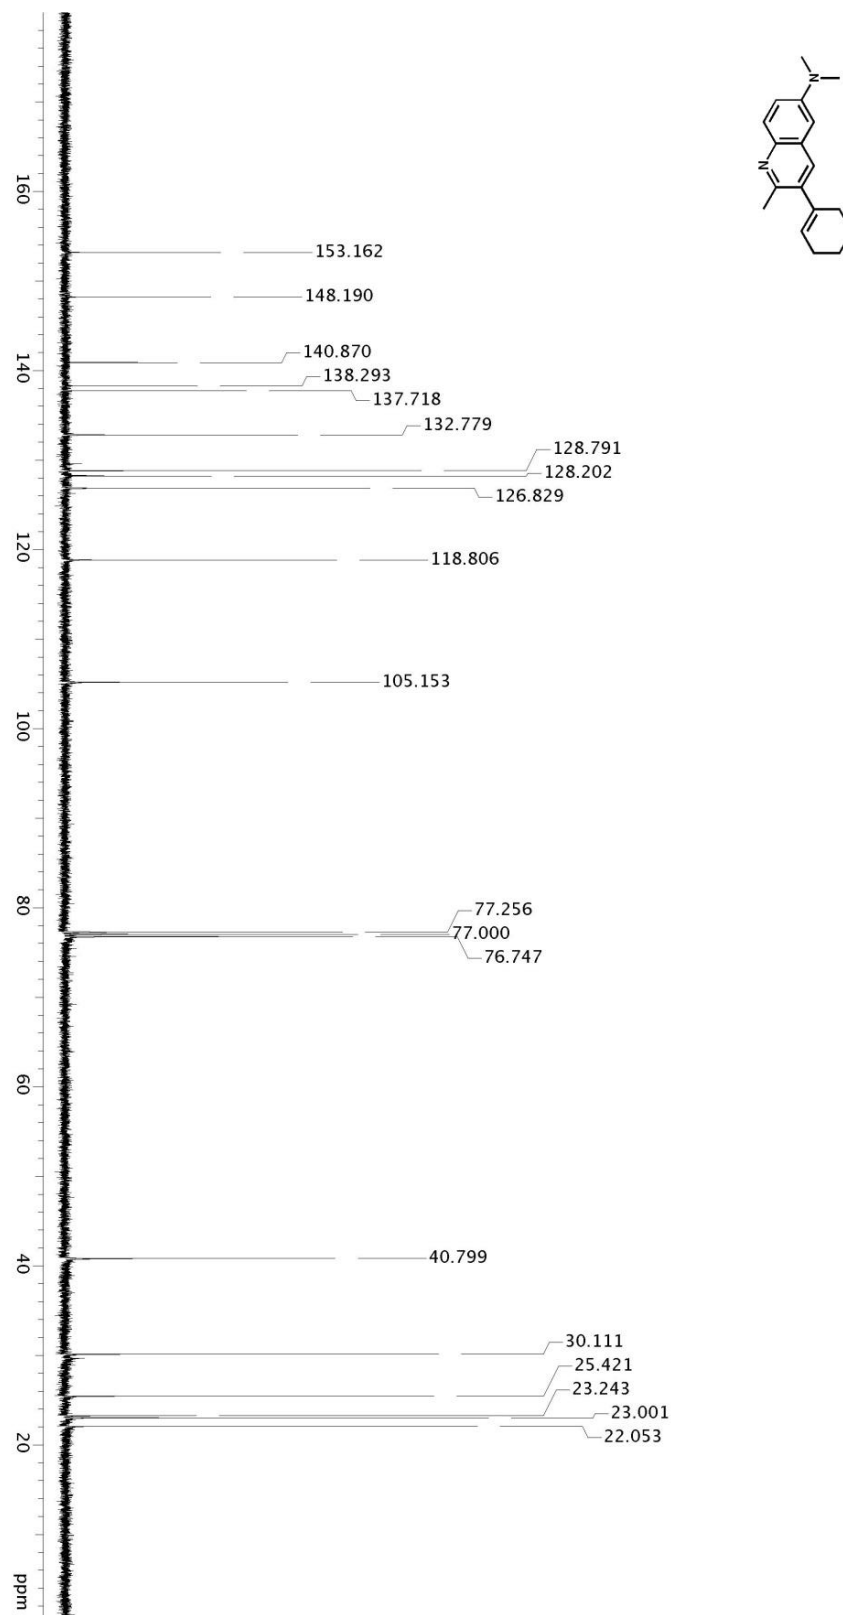

**Figure S38:** <sup>13</sup>C NMR spectrum for compound 3-cyclohexenyl-2-methyl-6-(N,N-dimethylamino)quinoline.

**(AD117, Quinoline 22):**

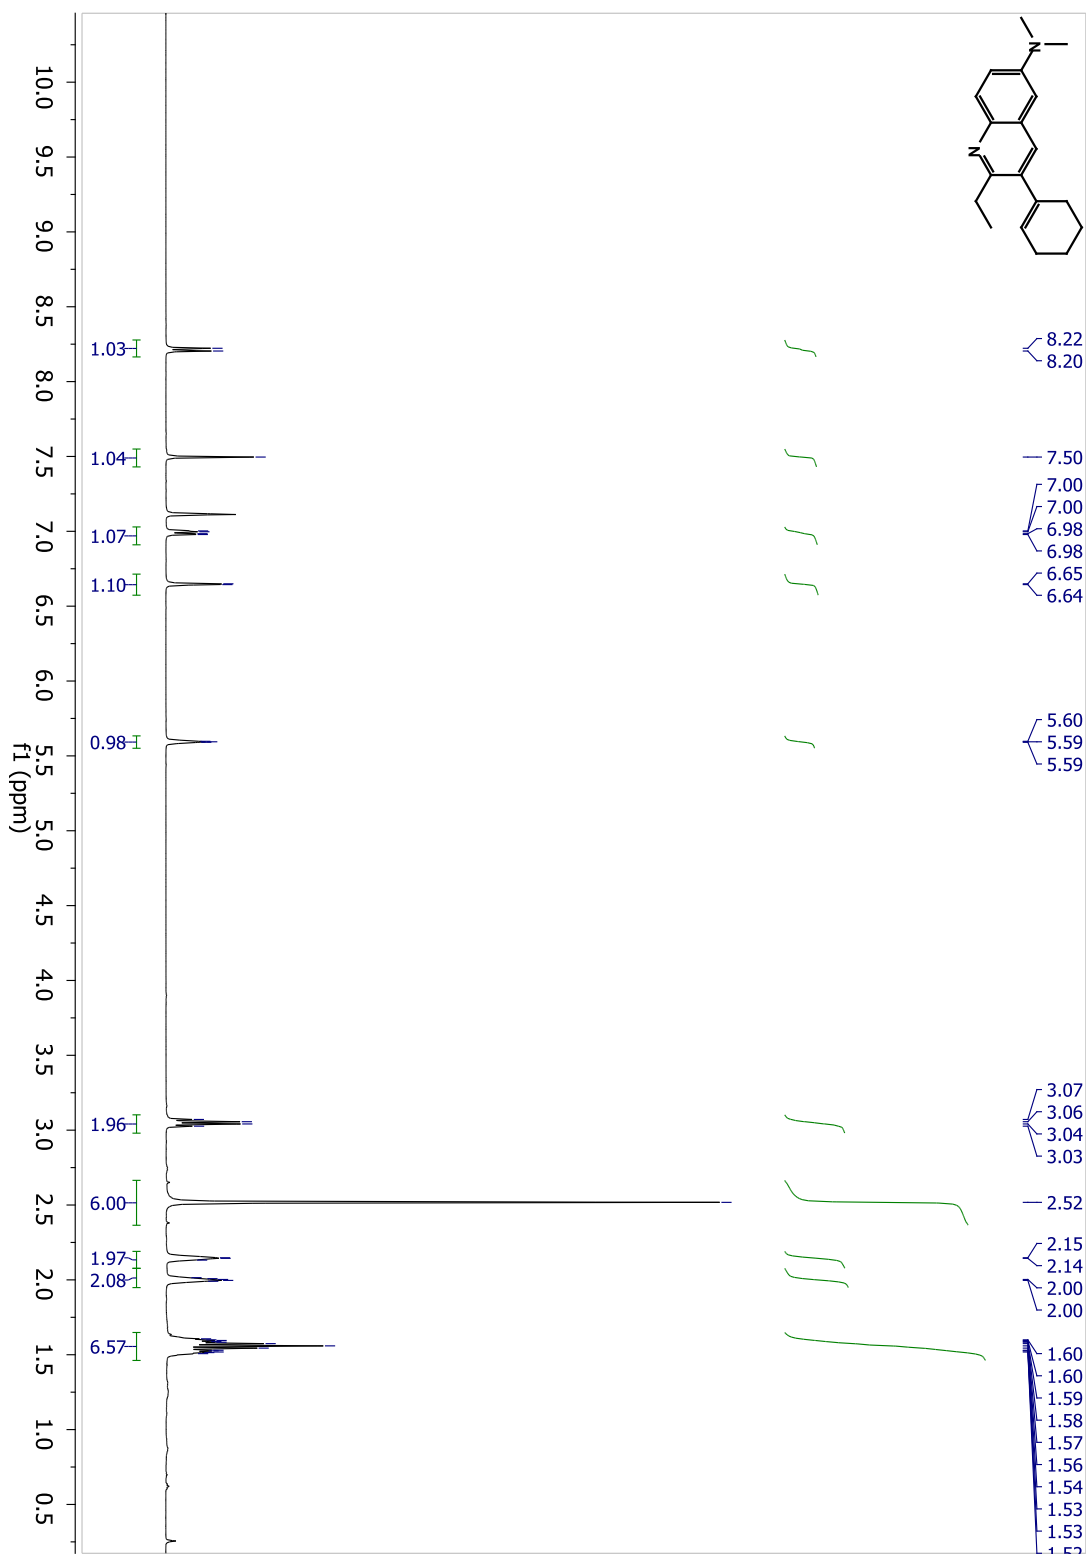

**Figure S39:**  $^1\text{H}$  NMR spectrum for compound 3-cyclohexenyl-2-ethyl-6(N,N-dimethylamino)quinoline.  
(TM-103, Quinoline 23)

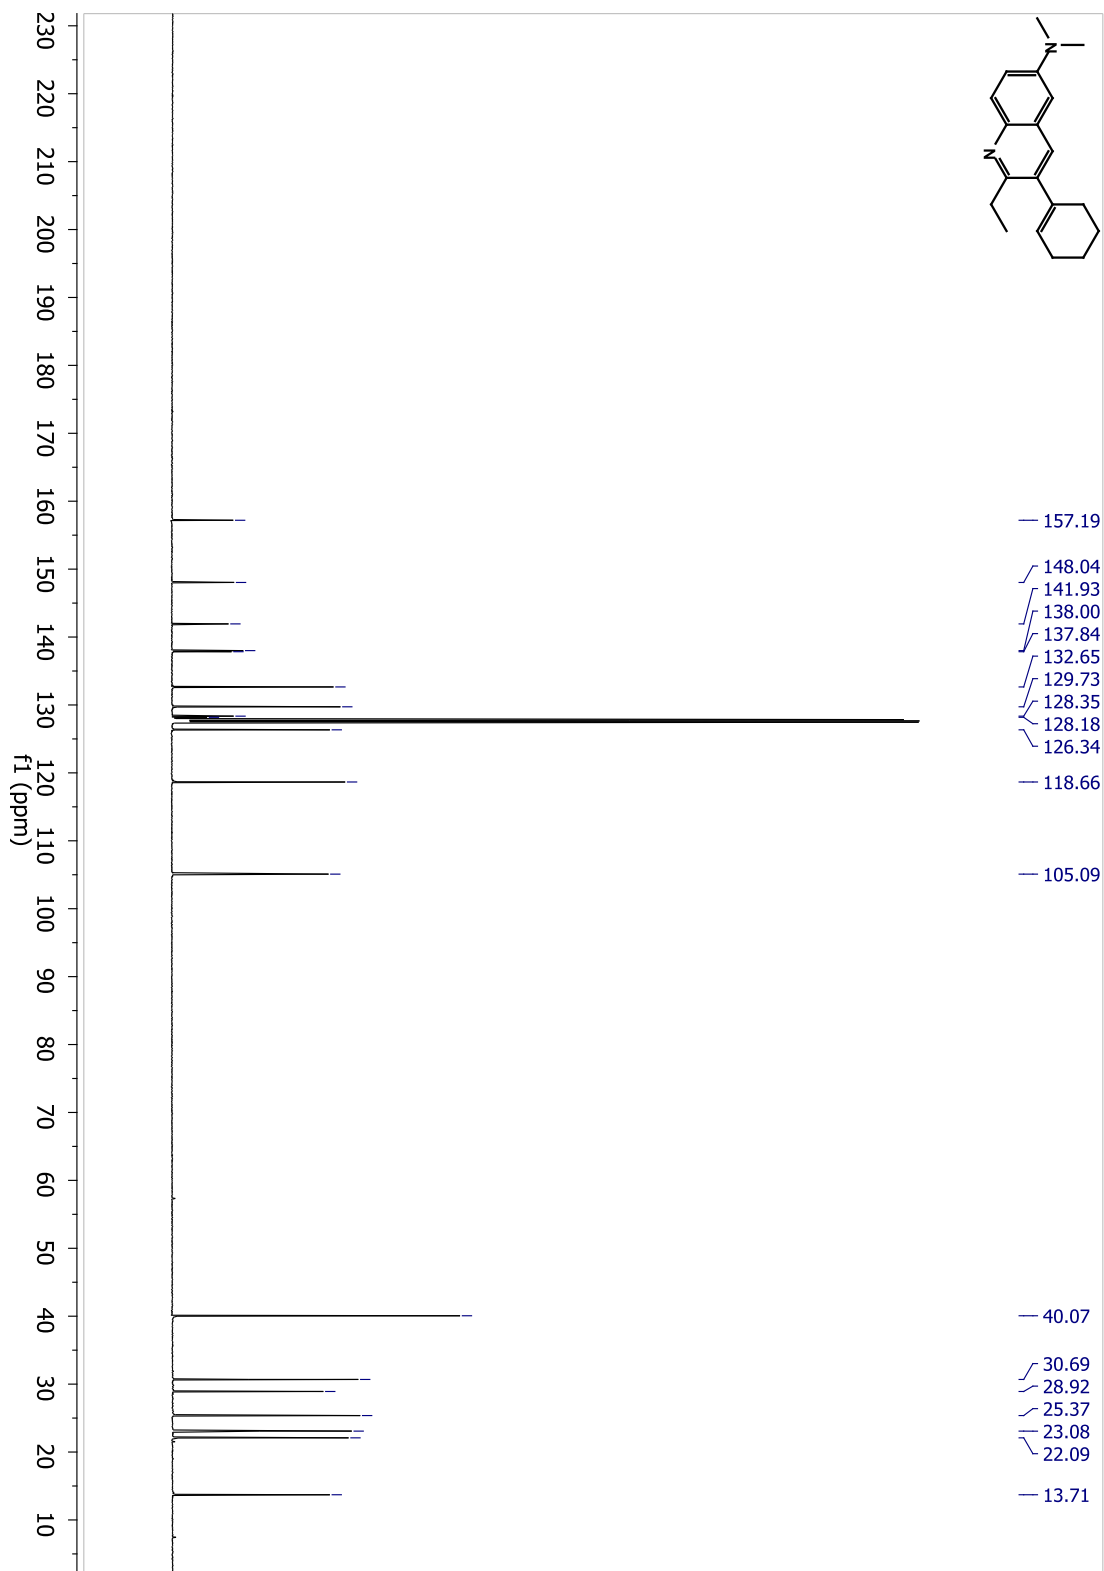

**Figure S40:**  $^{13}\text{C}$  NMR spectrum for compound 3-cyclohexenyl-2-ethyl-6(N,N-dimethylamino)quinoline.  
(TM-103, Quinoline 23)

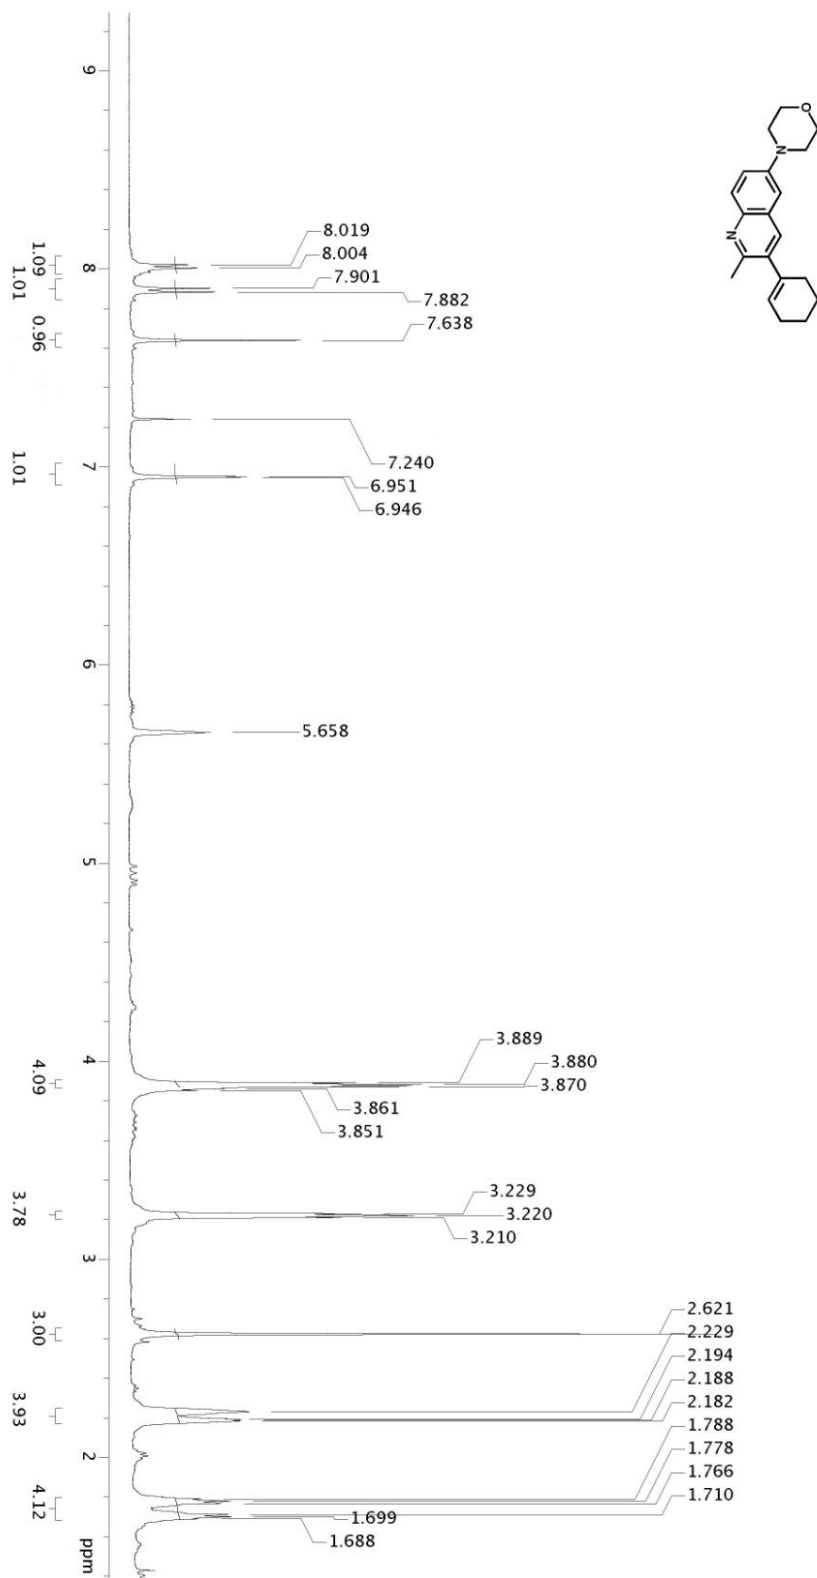

**Figure S41:** <sup>1</sup>H NMR spectrum for compound 3-cyclohexenyl-2-methyl-6-morpholinylquinoline.  
(AD120, Quinoline 24)

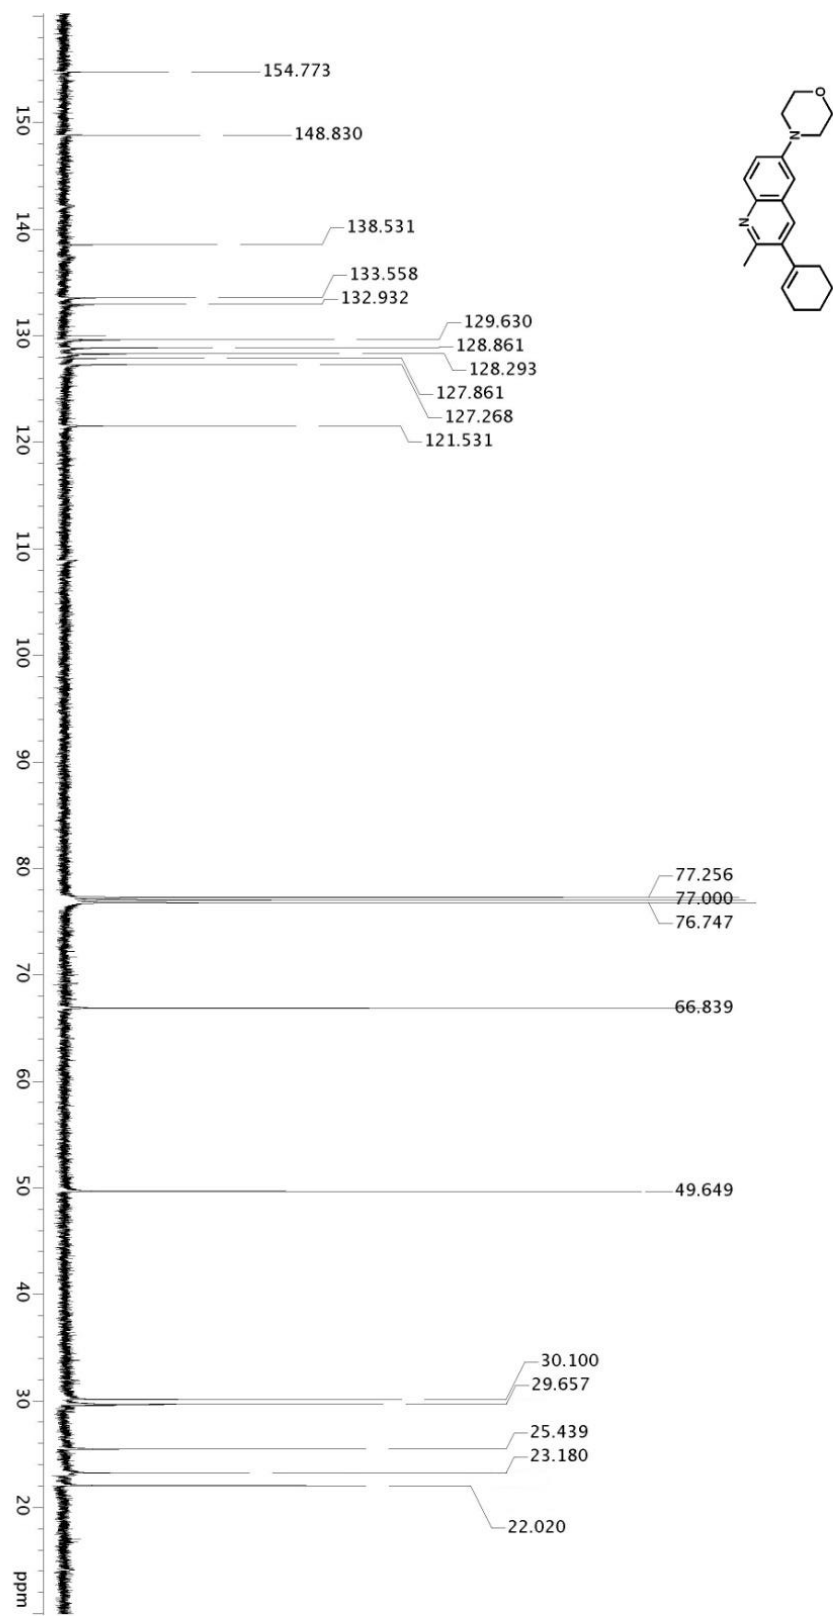

**Figure S42:** <sup>13</sup>C NMR spectrum for compound 3-cyclohexenyl-2-methyl-6-morpholinylquinoline. (AD120, Quinoline 24)

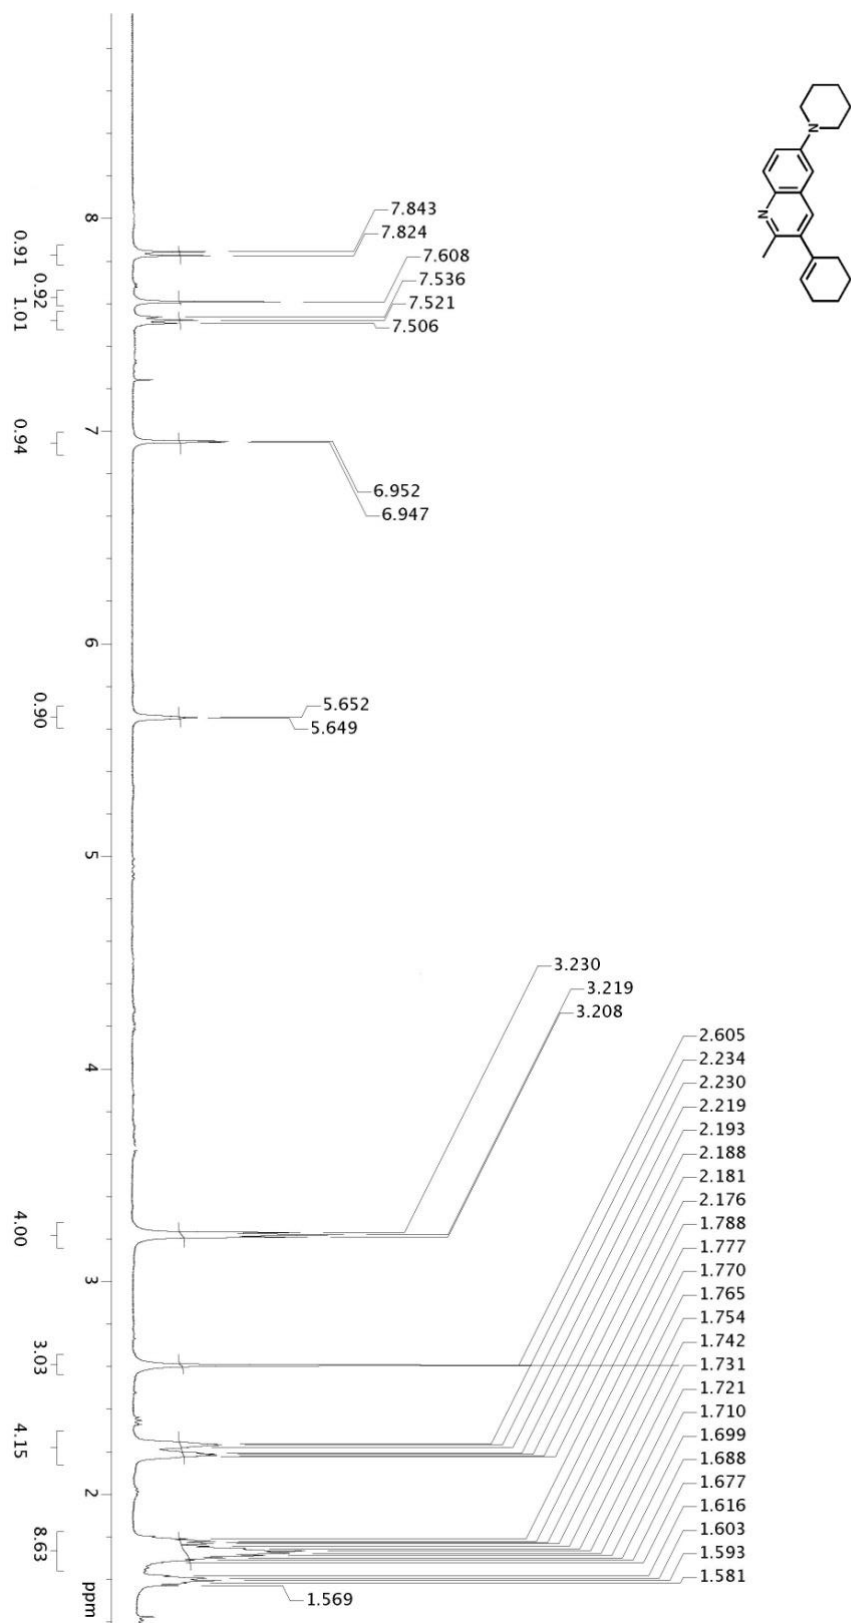

**Figure S43:** <sup>1</sup>H NMR spectrum for compound 3-cyclohexenyl-2-methyl-6-piperidinylquinoline.  
(AD121, Quinoline 25):

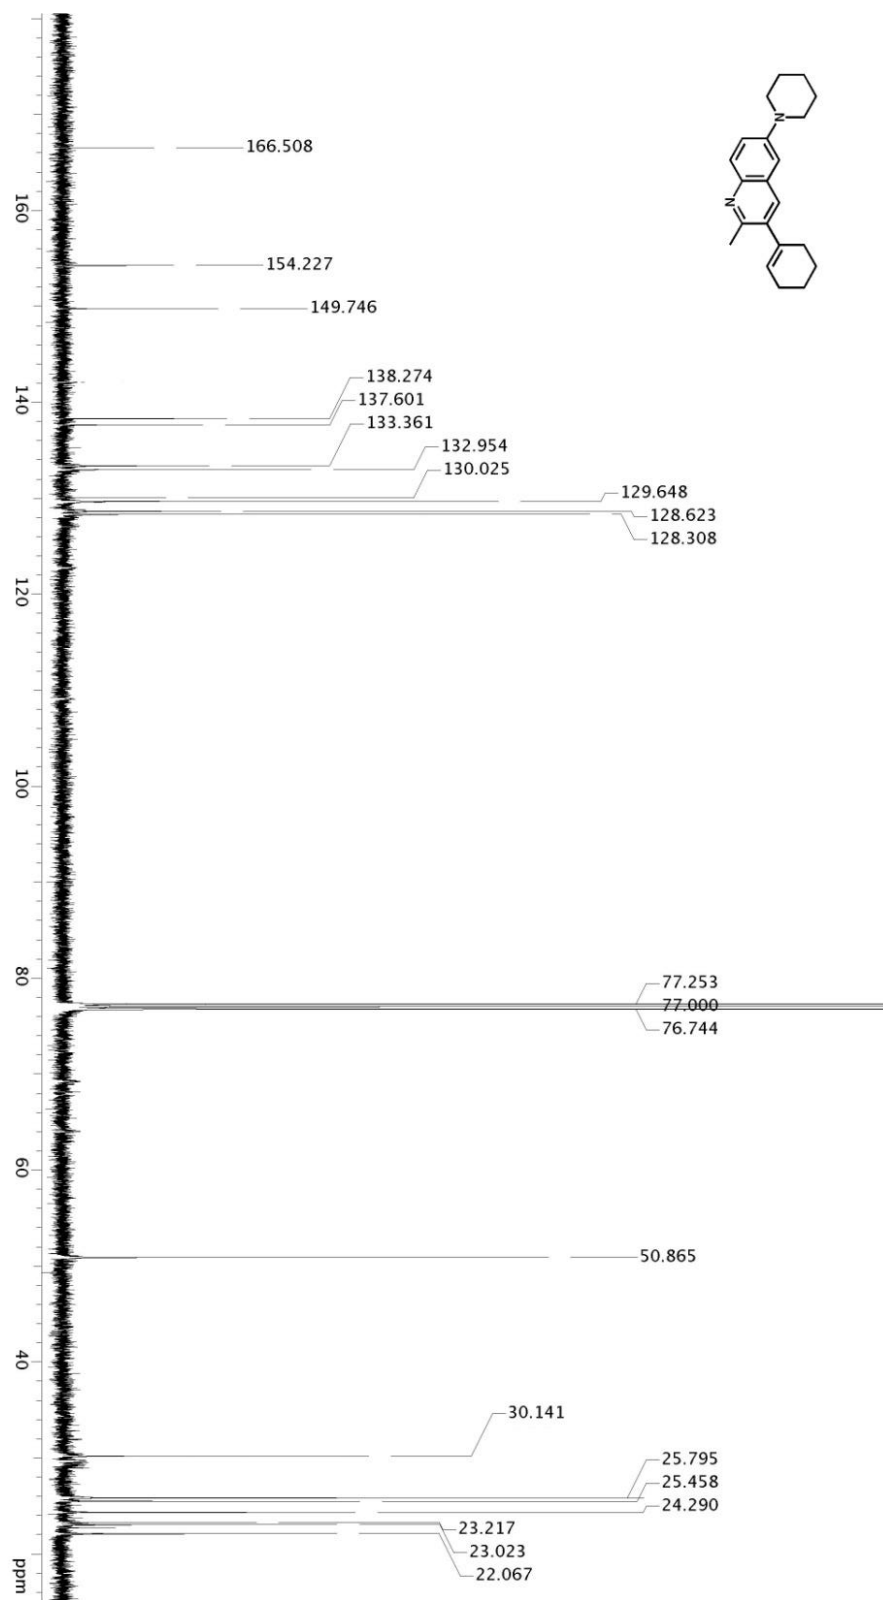

**Figure S44:** <sup>13</sup>C NMR spectrum for compound 3-cyclohexenyl-2-methyl-6-piperidinylquinoline. (AD121, Quinoline 25):



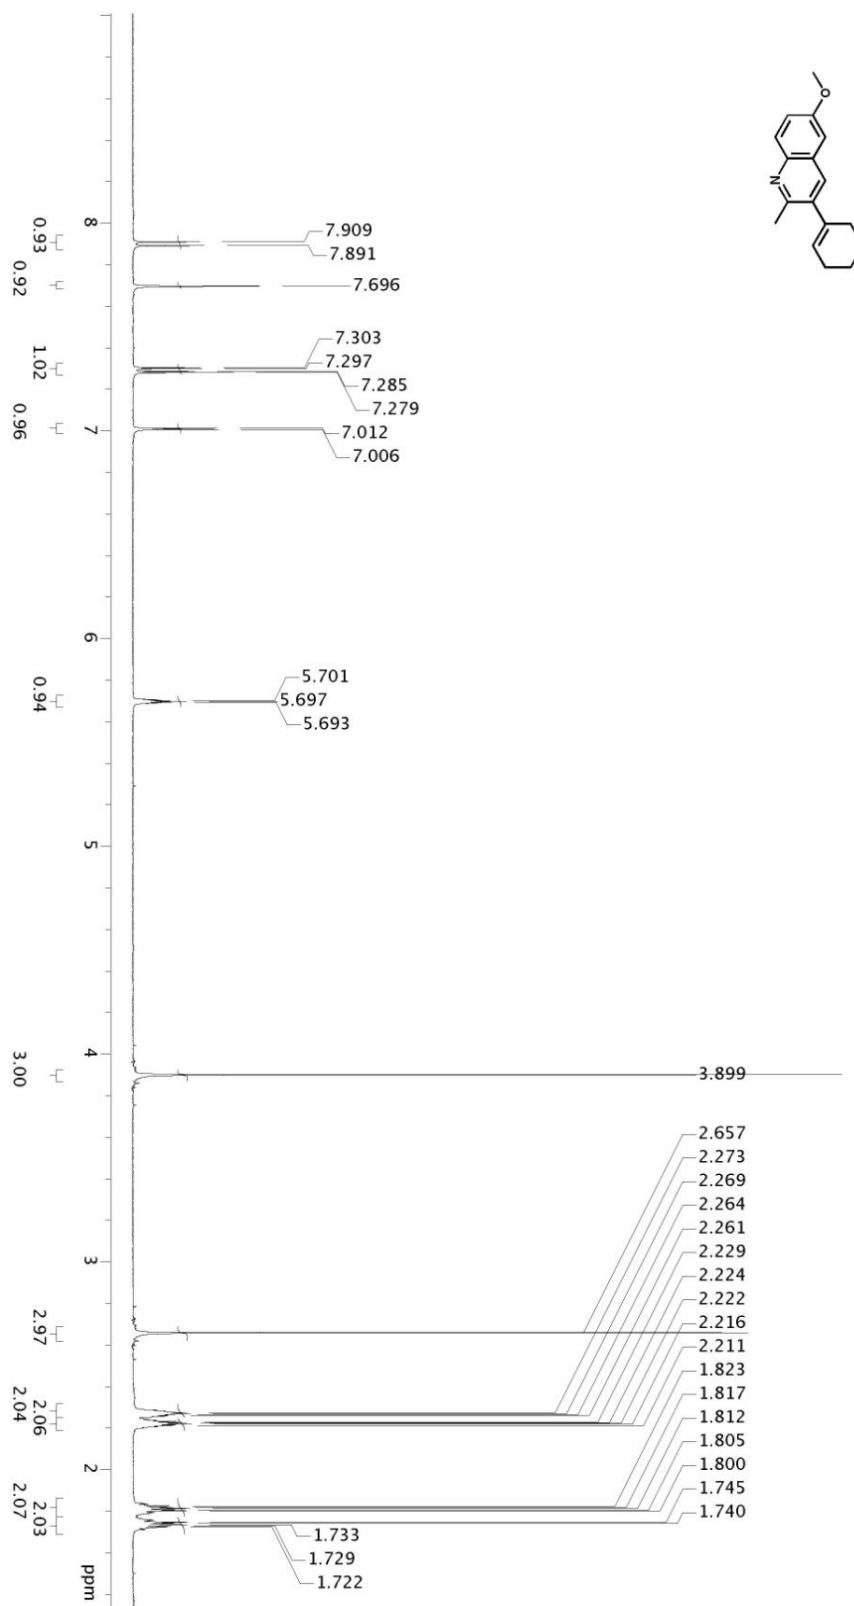

**Figure S45:** <sup>1</sup>H NMR spectrum for compound 3-cyclohexenyl-6-methoxy-2-methylquinoline.  
(AD119, Quinoline 26)

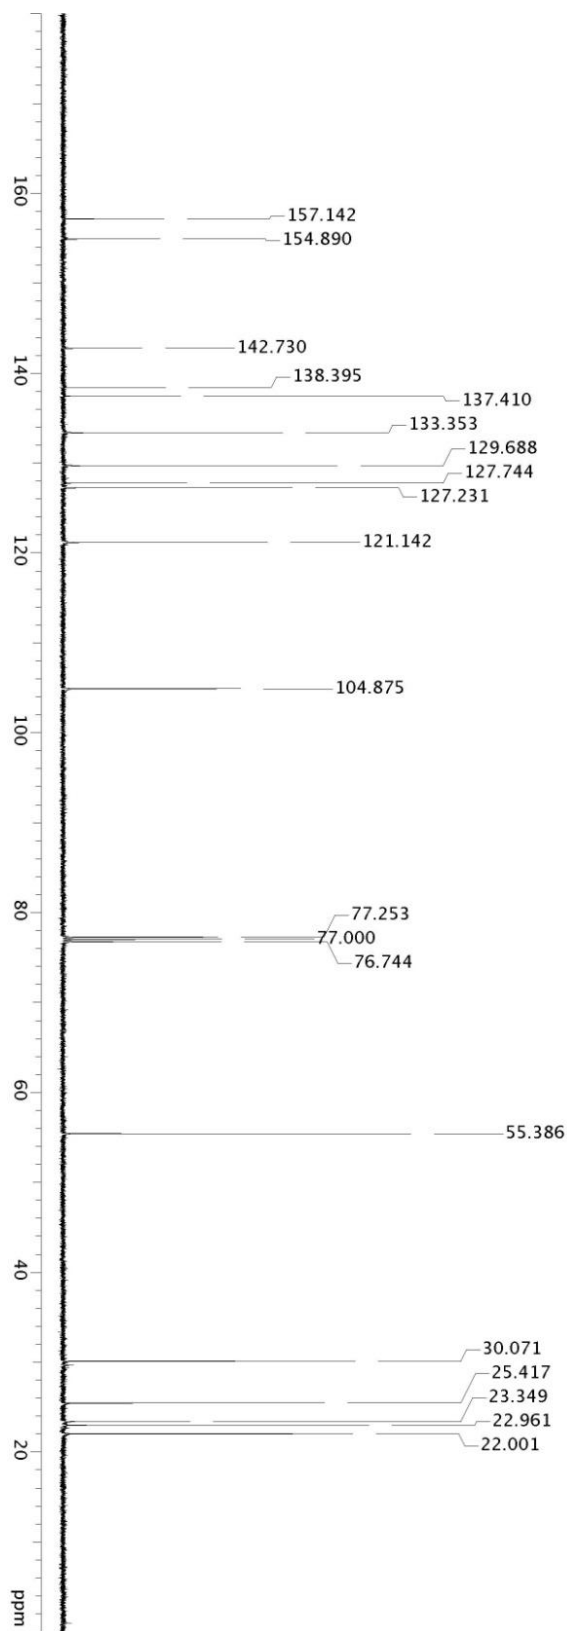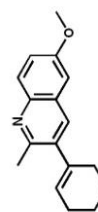

**Figure S46:** <sup>13</sup>C NMR spectrum for compound 3-cyclohexenyl-6-methoxy-2-methylquinoline.  
(AD119, Quinoline 26)

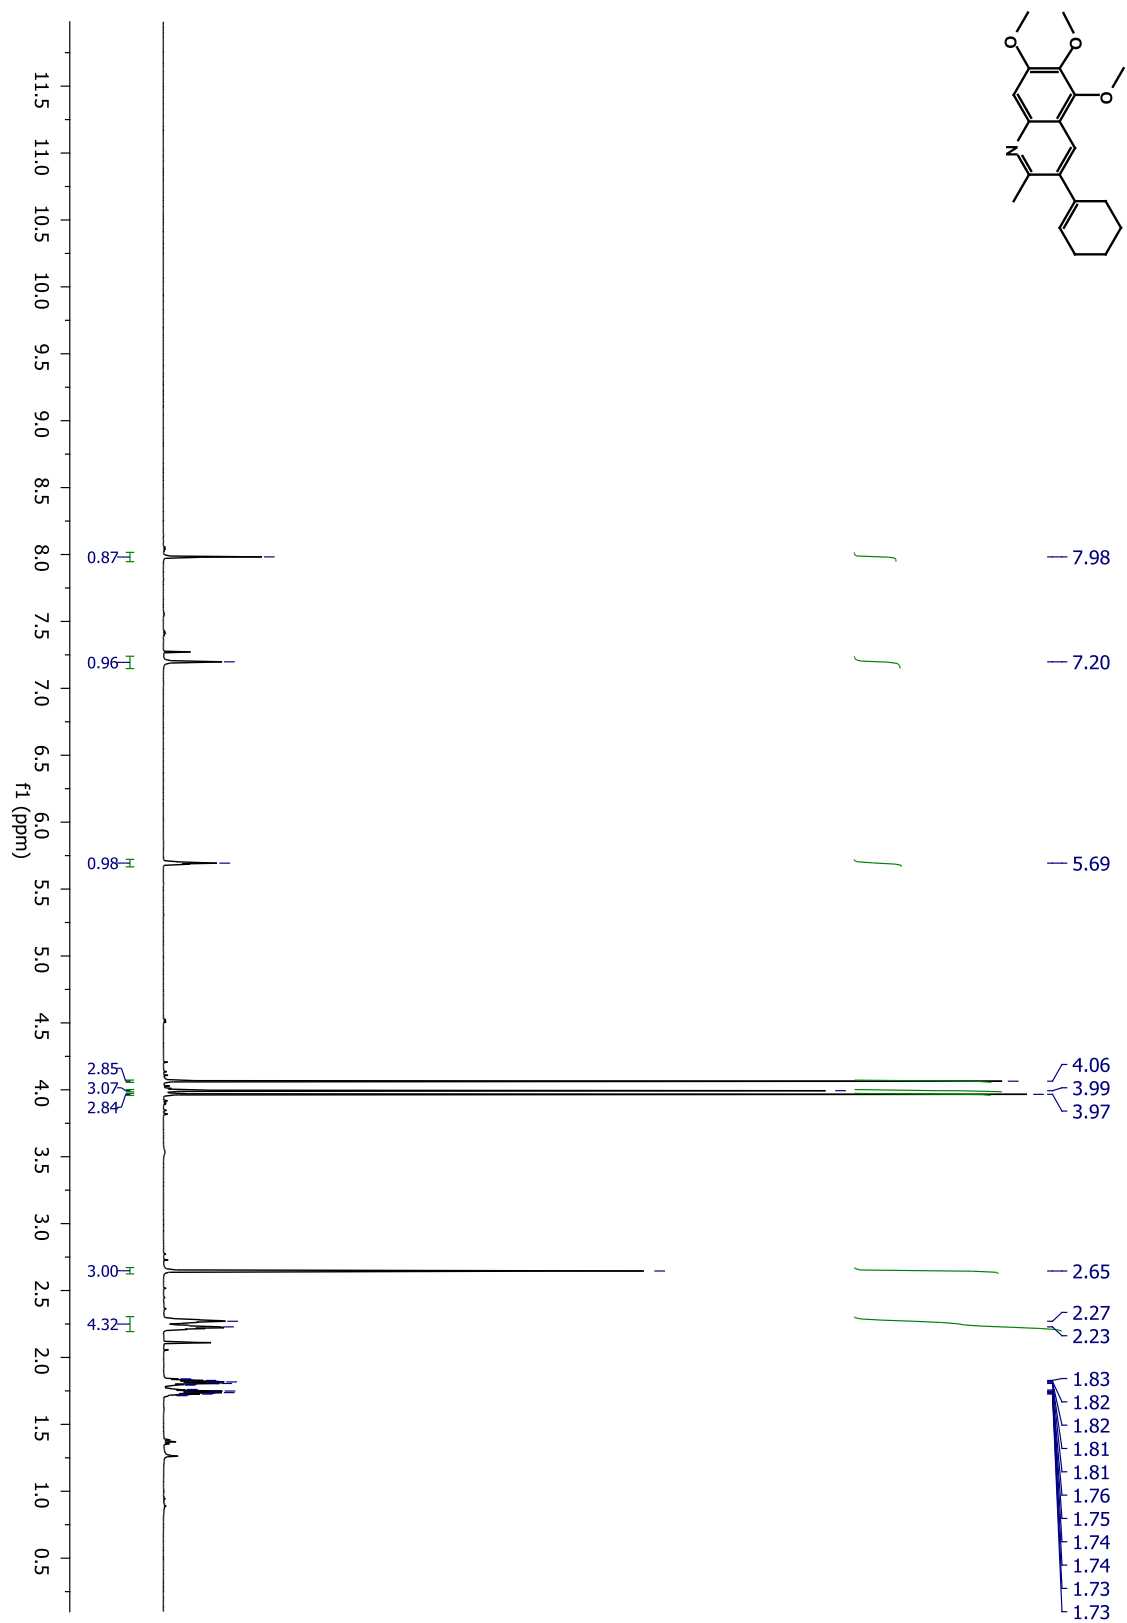

**Figure S47:** <sup>1</sup>H NMR spectrum for compound 3-cyclohexenyl-5,6,7-trimethoxy-2-methylquinoline.  
(TM300, Quinoline 27)

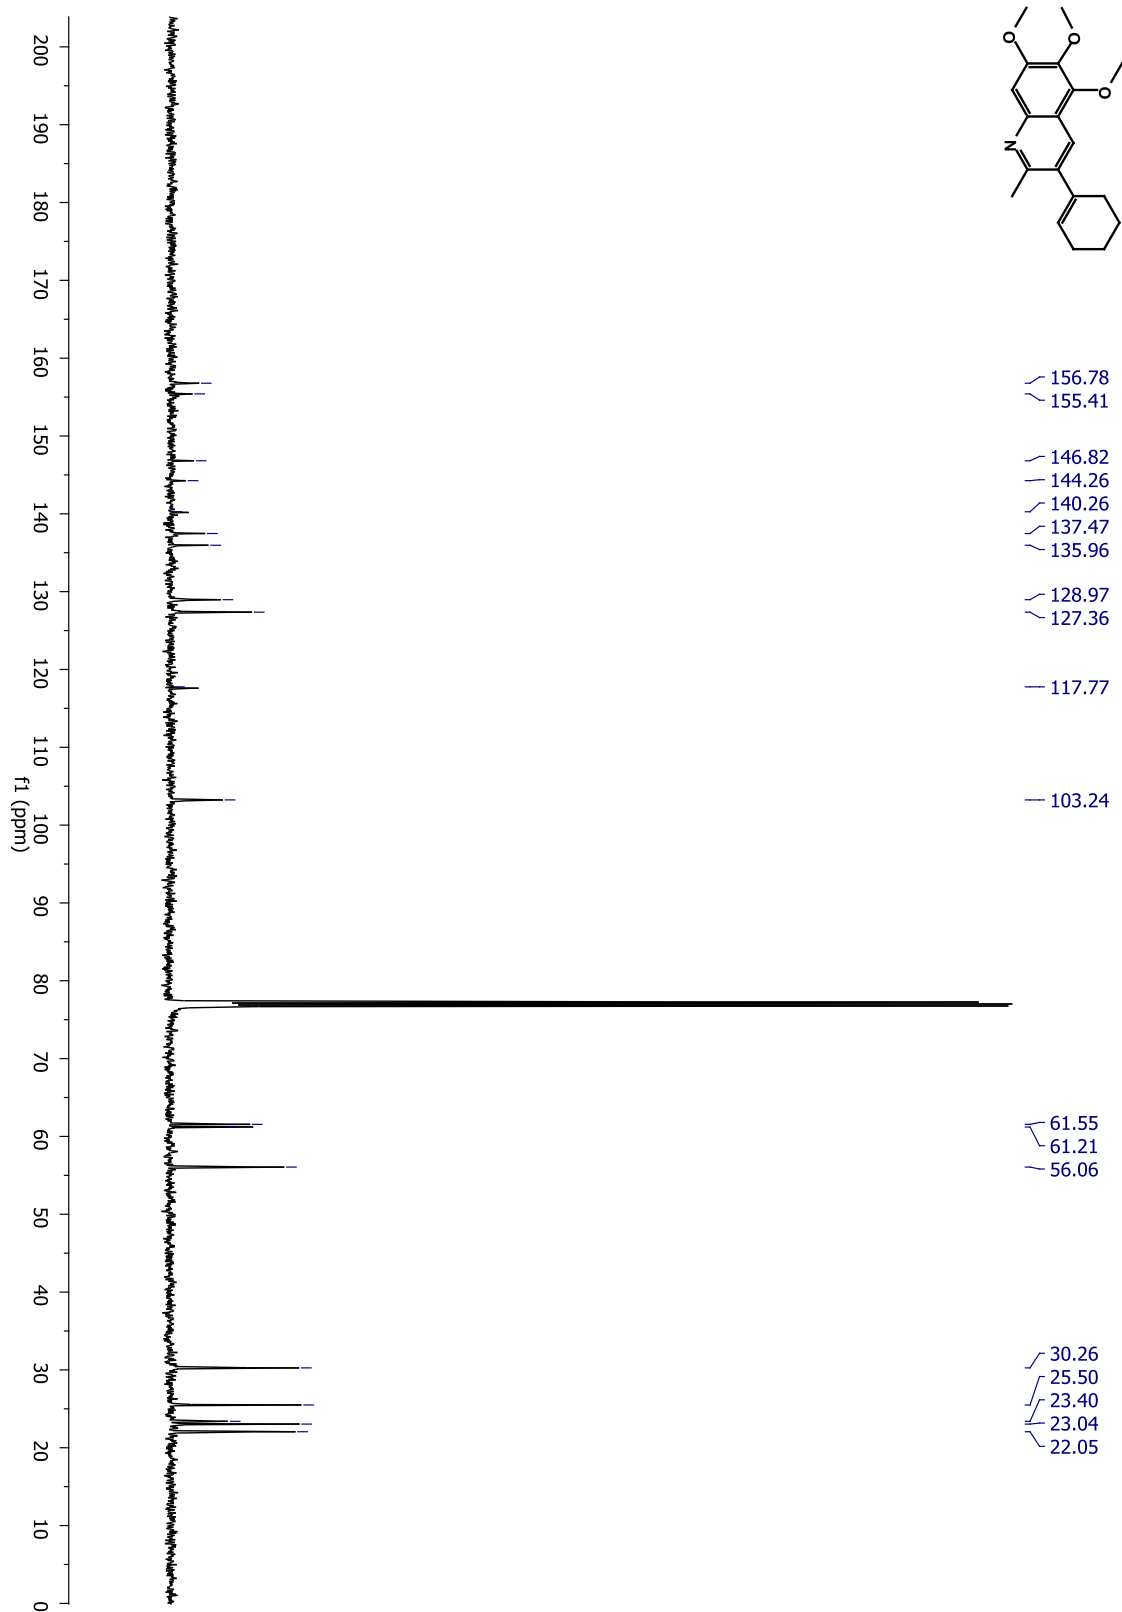

**Figure S48:**  $^{13}\text{C}$  NMR spectrum for compound 3-cyclohexenyl-5,6,7-trimethoxy-2-methylquinoline.  
(TM300, Quinoline 27)

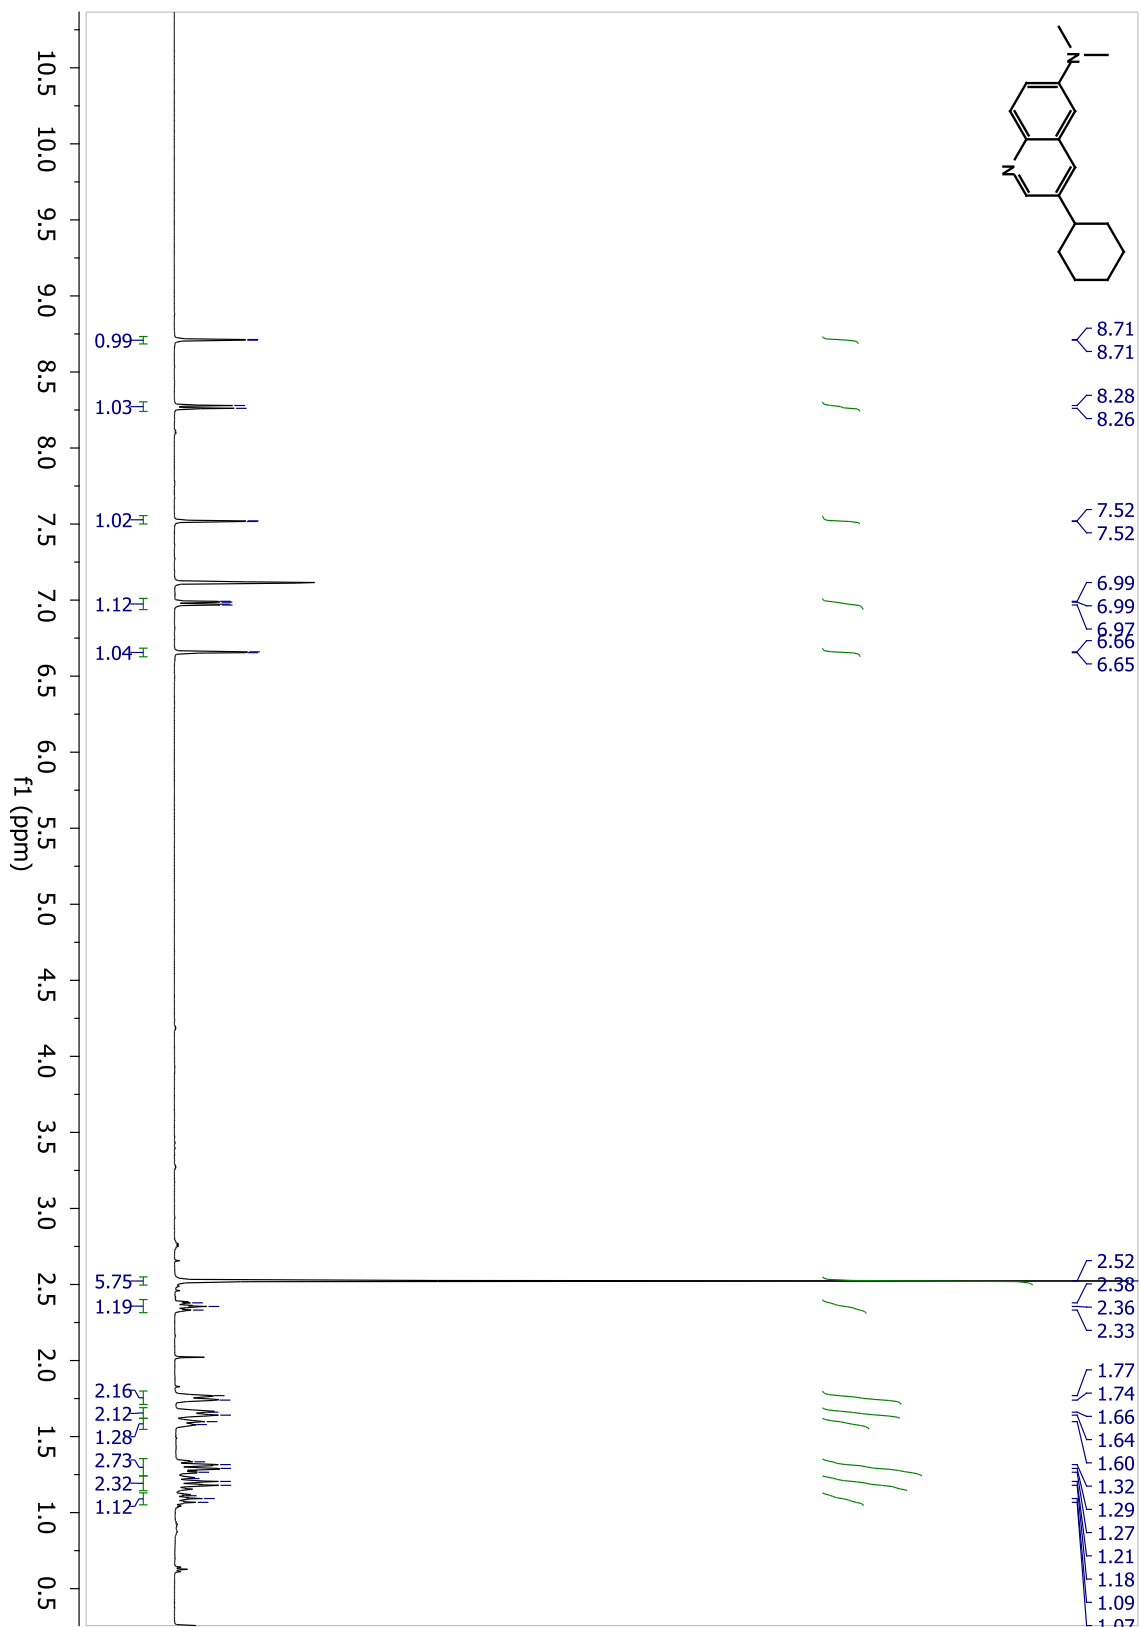

**Figure S49:**  $^1\text{H}$  NMR spectrum for compound 3-cyclohexyl-6-(N,N-dimethylamino)quinoline.  
(TM-102, Quinoline 28)

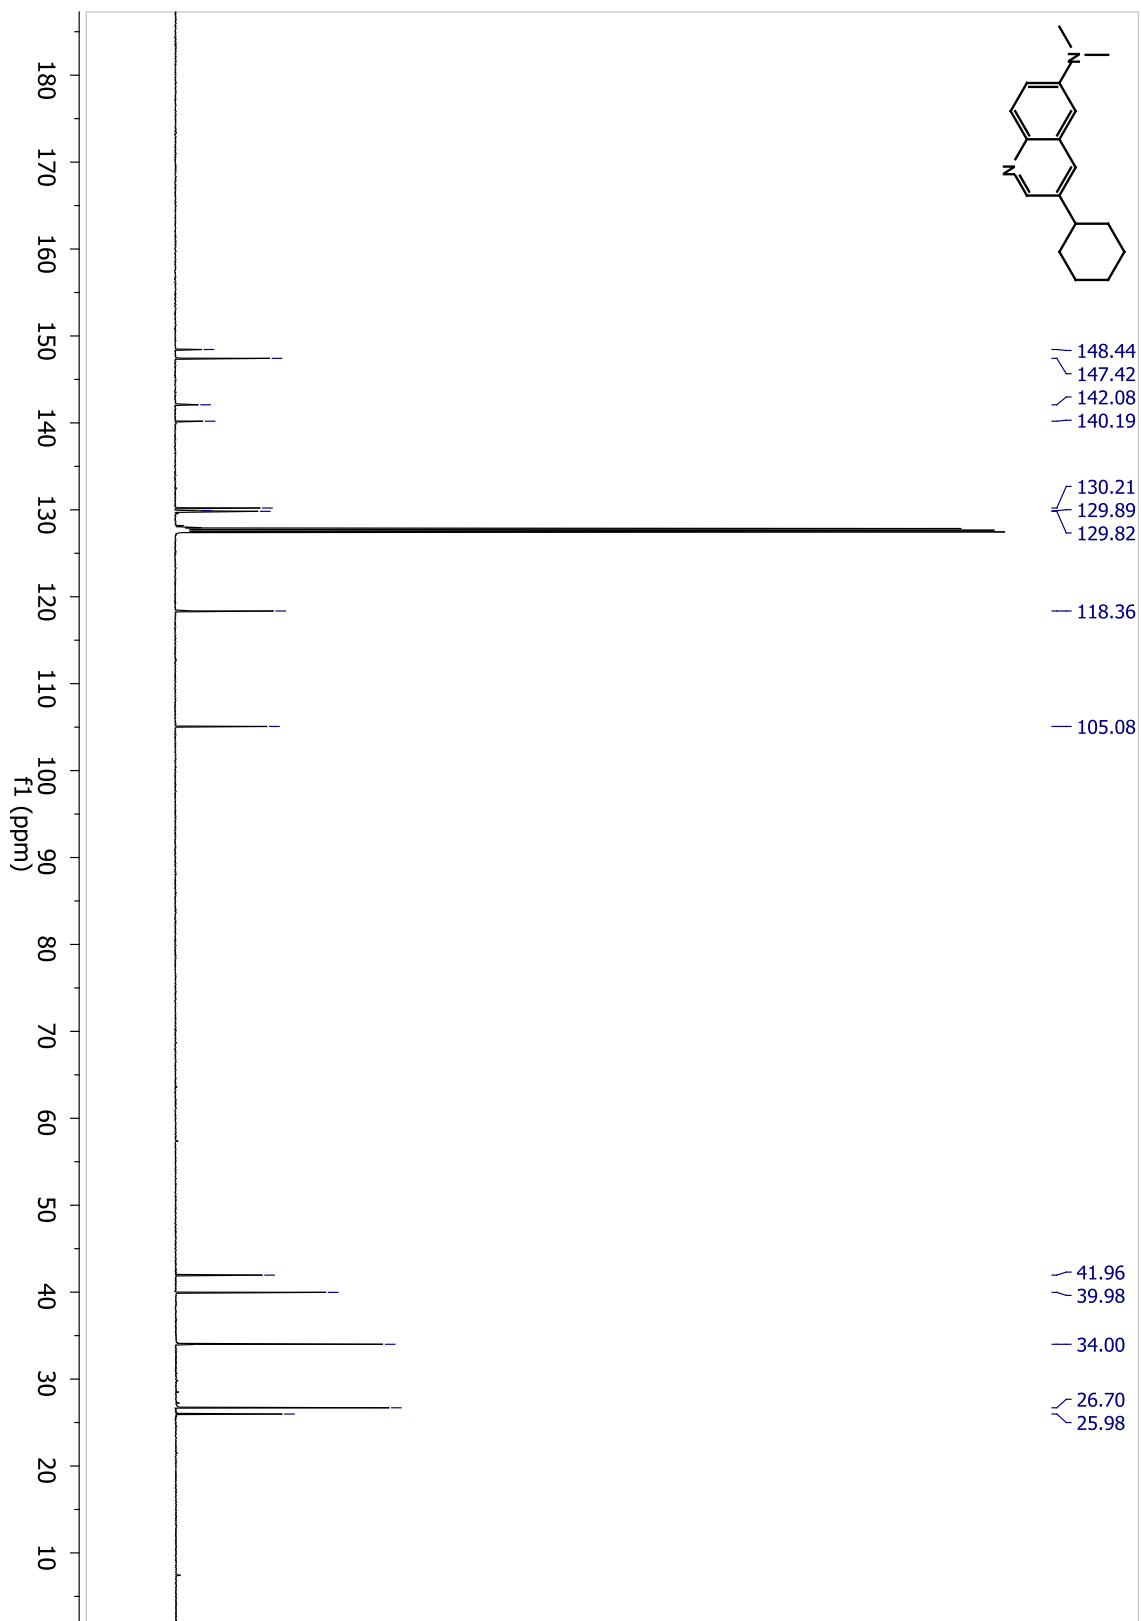

**Figure S50:**  $^{13}\text{C}$  NMR spectrum for compound 3-cyclohexyl-6-(N,N-dimethylamino)quinoline.  
(TM-102, Quinoline 28)

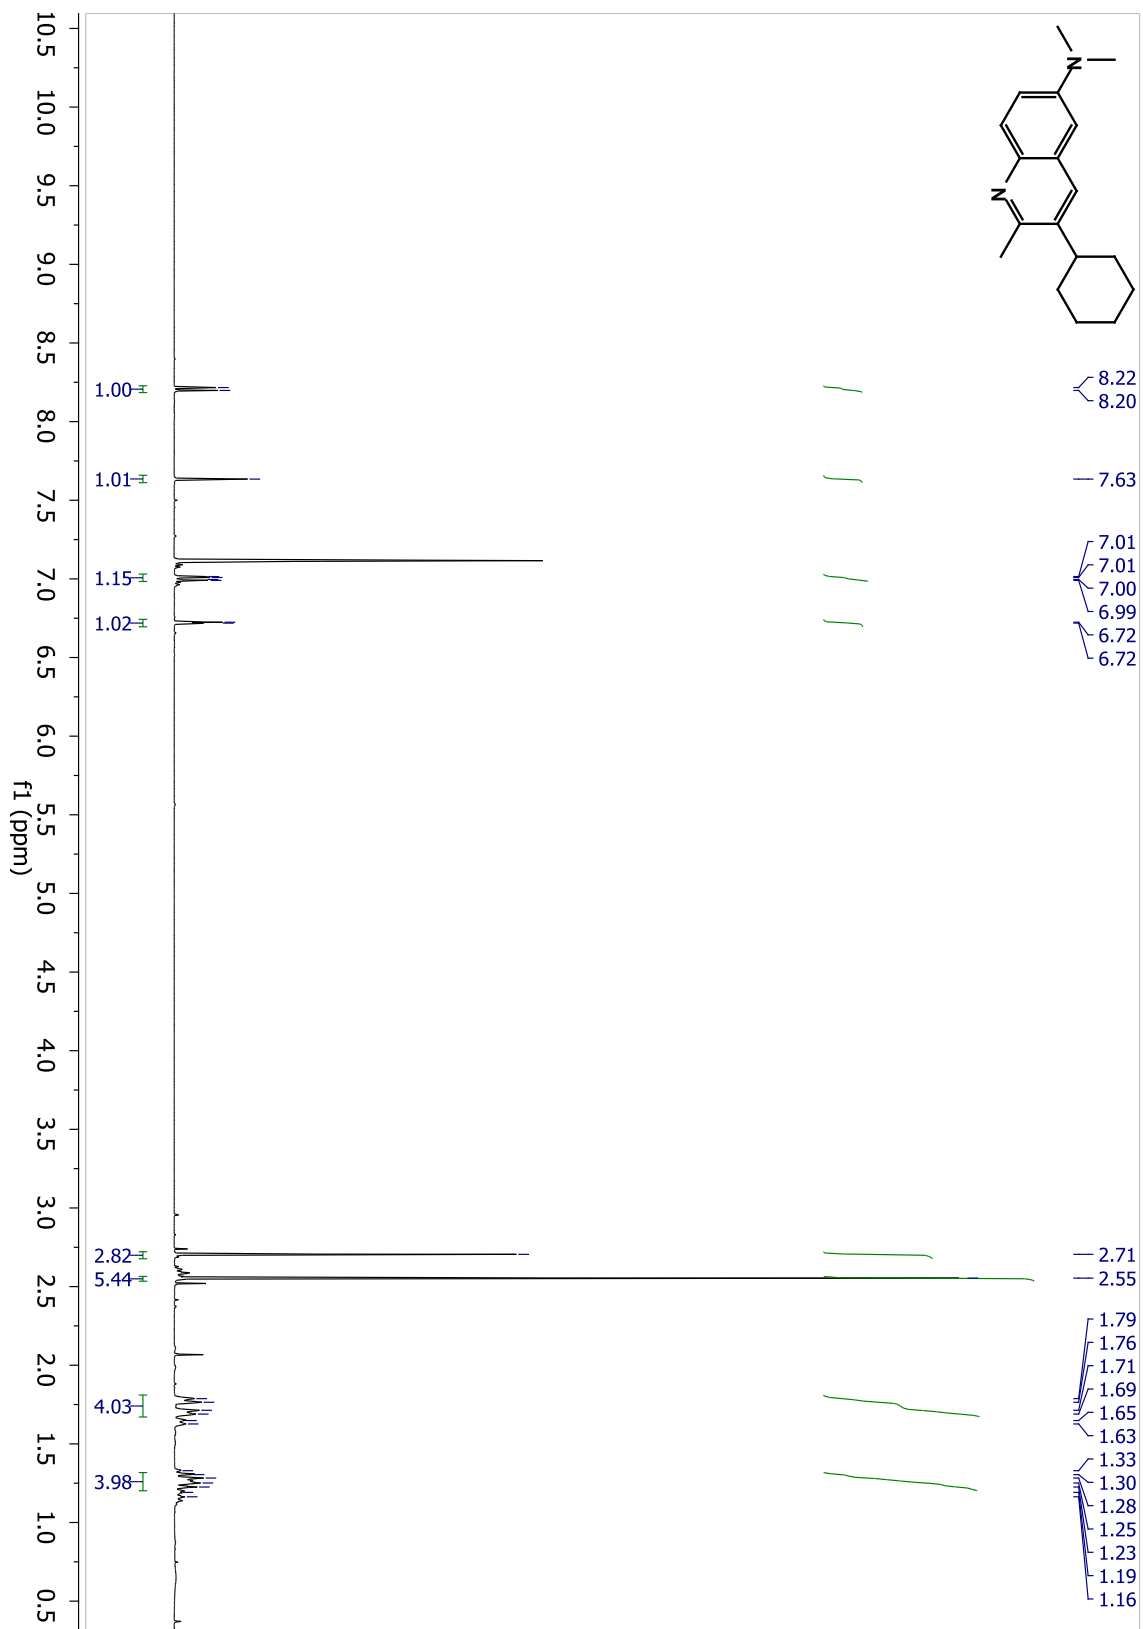

**Figure S51:** <sup>1</sup>H NMR spectrum for compound 3-cyclohexyl-2-methyl-6-(N,N-dimethylamino)quinoline.  
(TM-116, Quinoline 29)

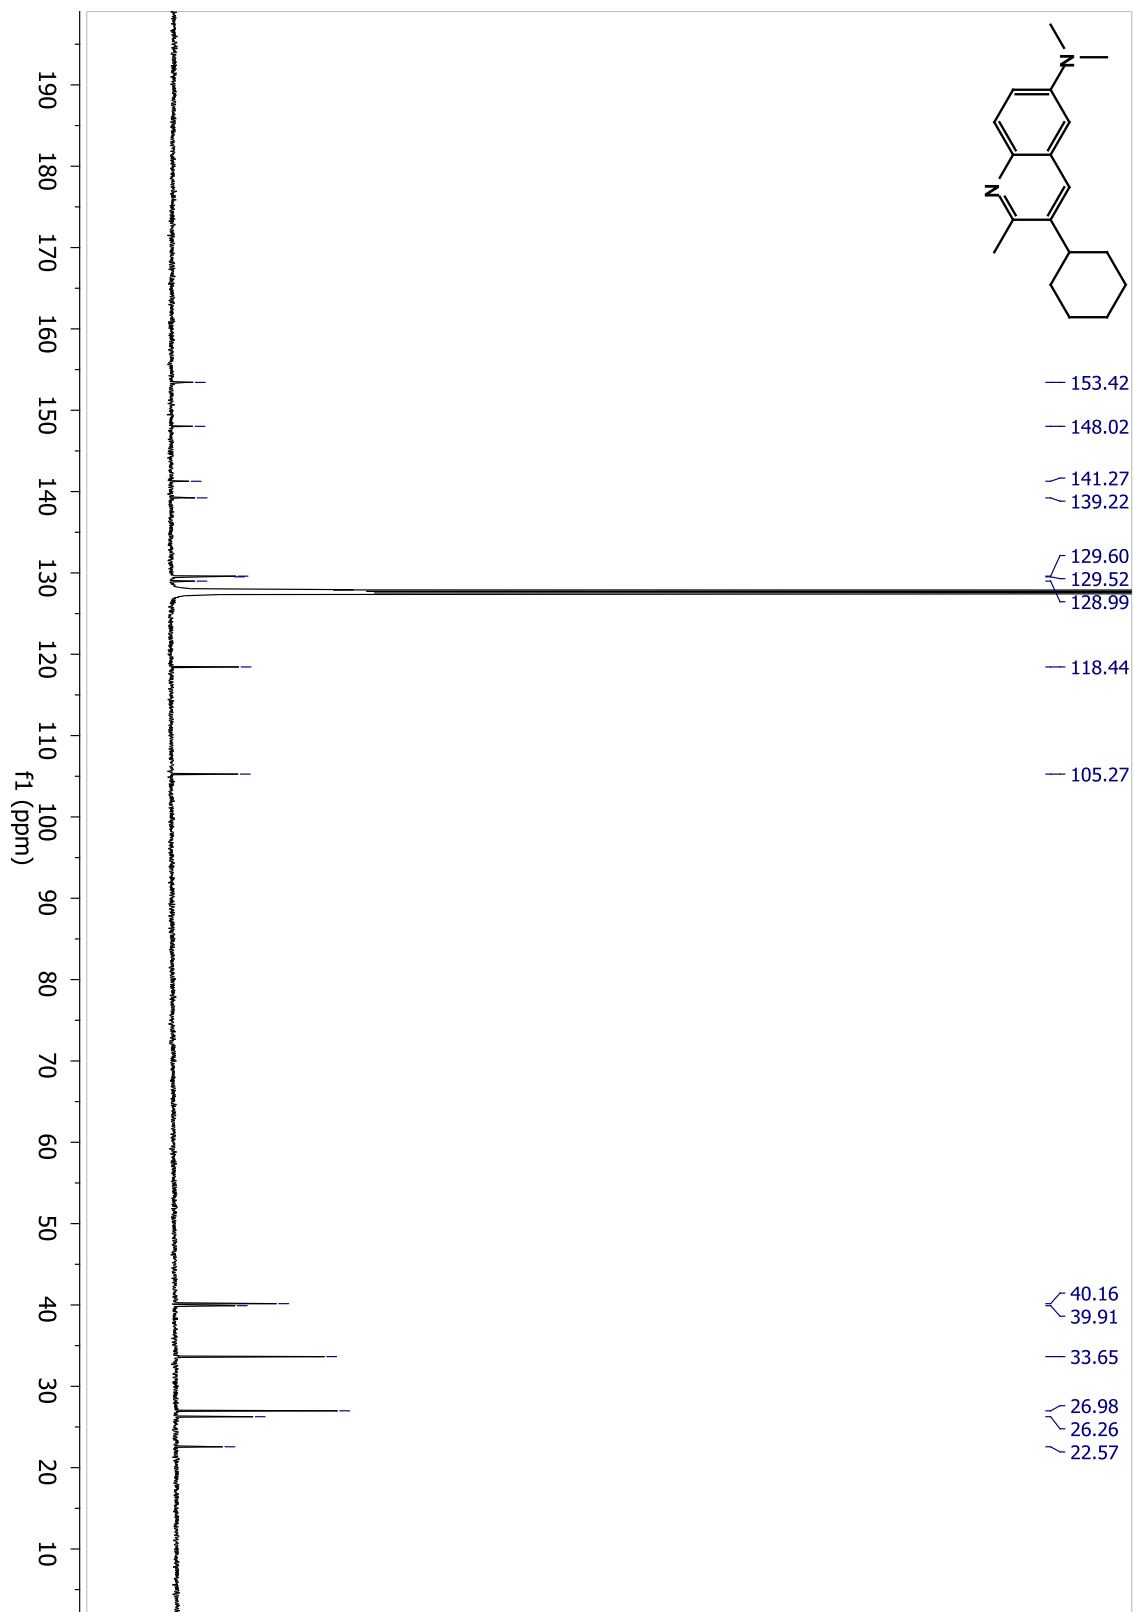

**Figure S52:**  $^{13}\text{C}$  NMR spectrum for compound 3-cyclohexyl-2-methyl-6-(N,N-dimethylamino)quinoline.  
(TM-116, Quinoline 29)



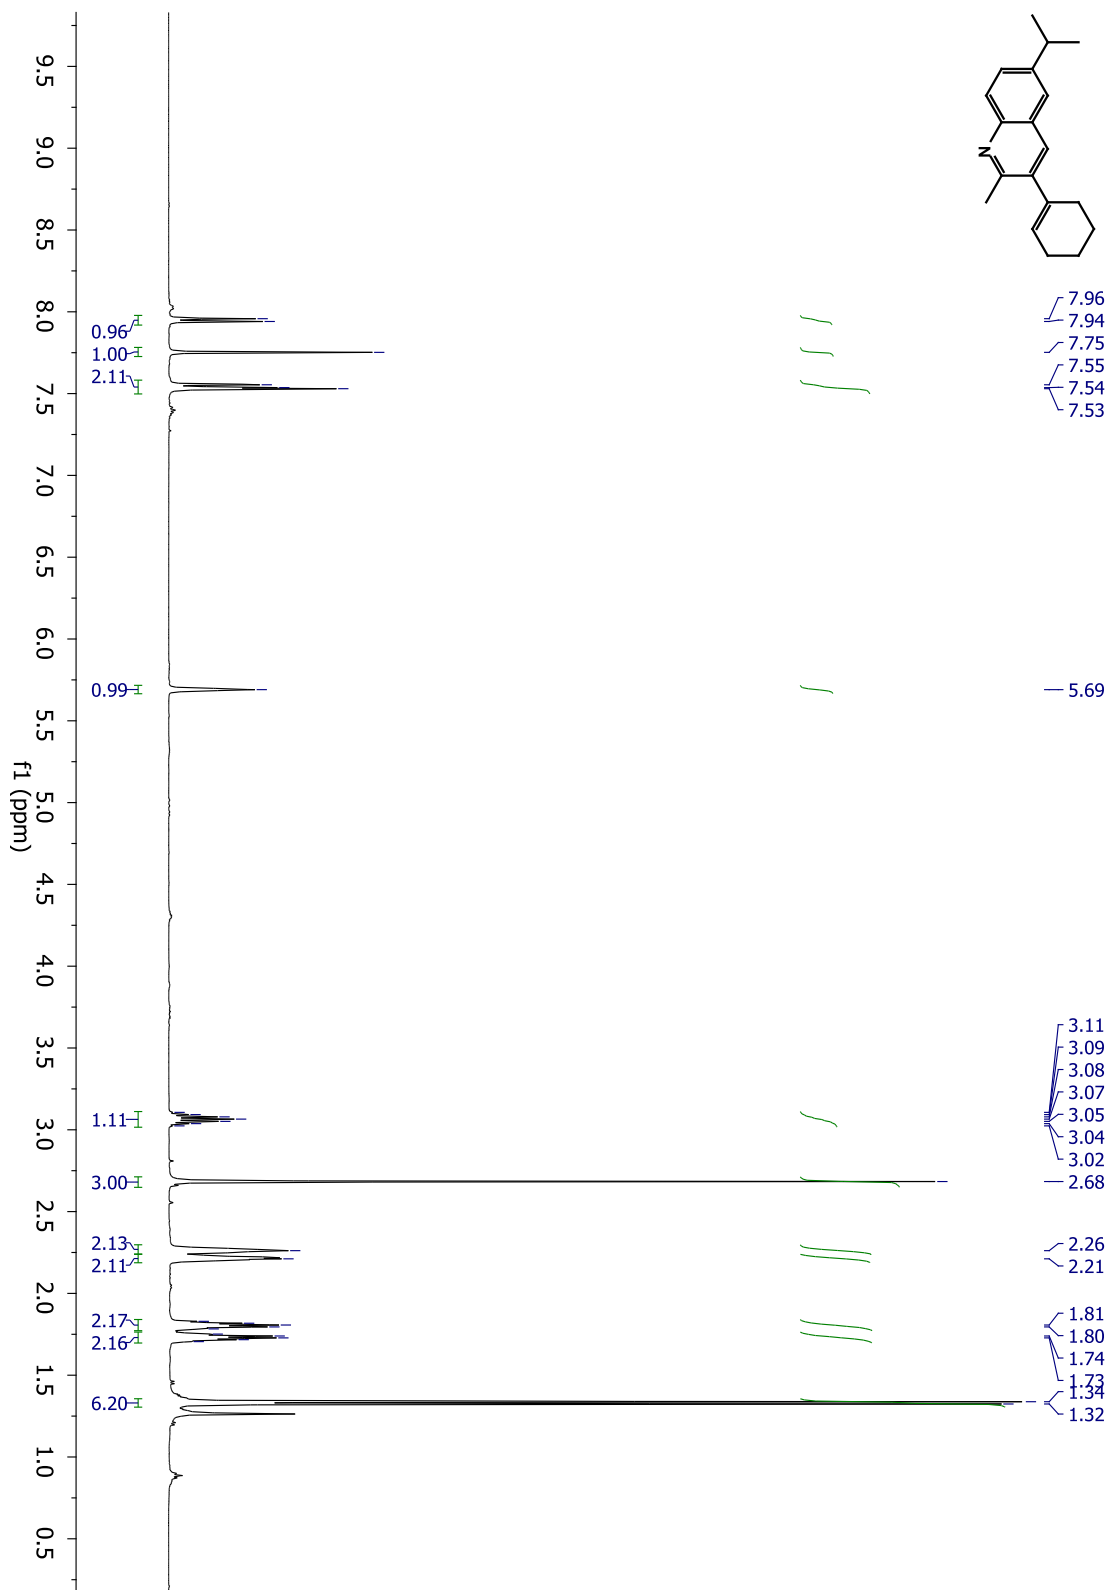

**Figure S53:** <sup>1</sup>H NMR spectrum for compound 3-cyclohexenyl-6-isopropyl-2-methylquinoline.  
(TM-117, Quinoline 30)

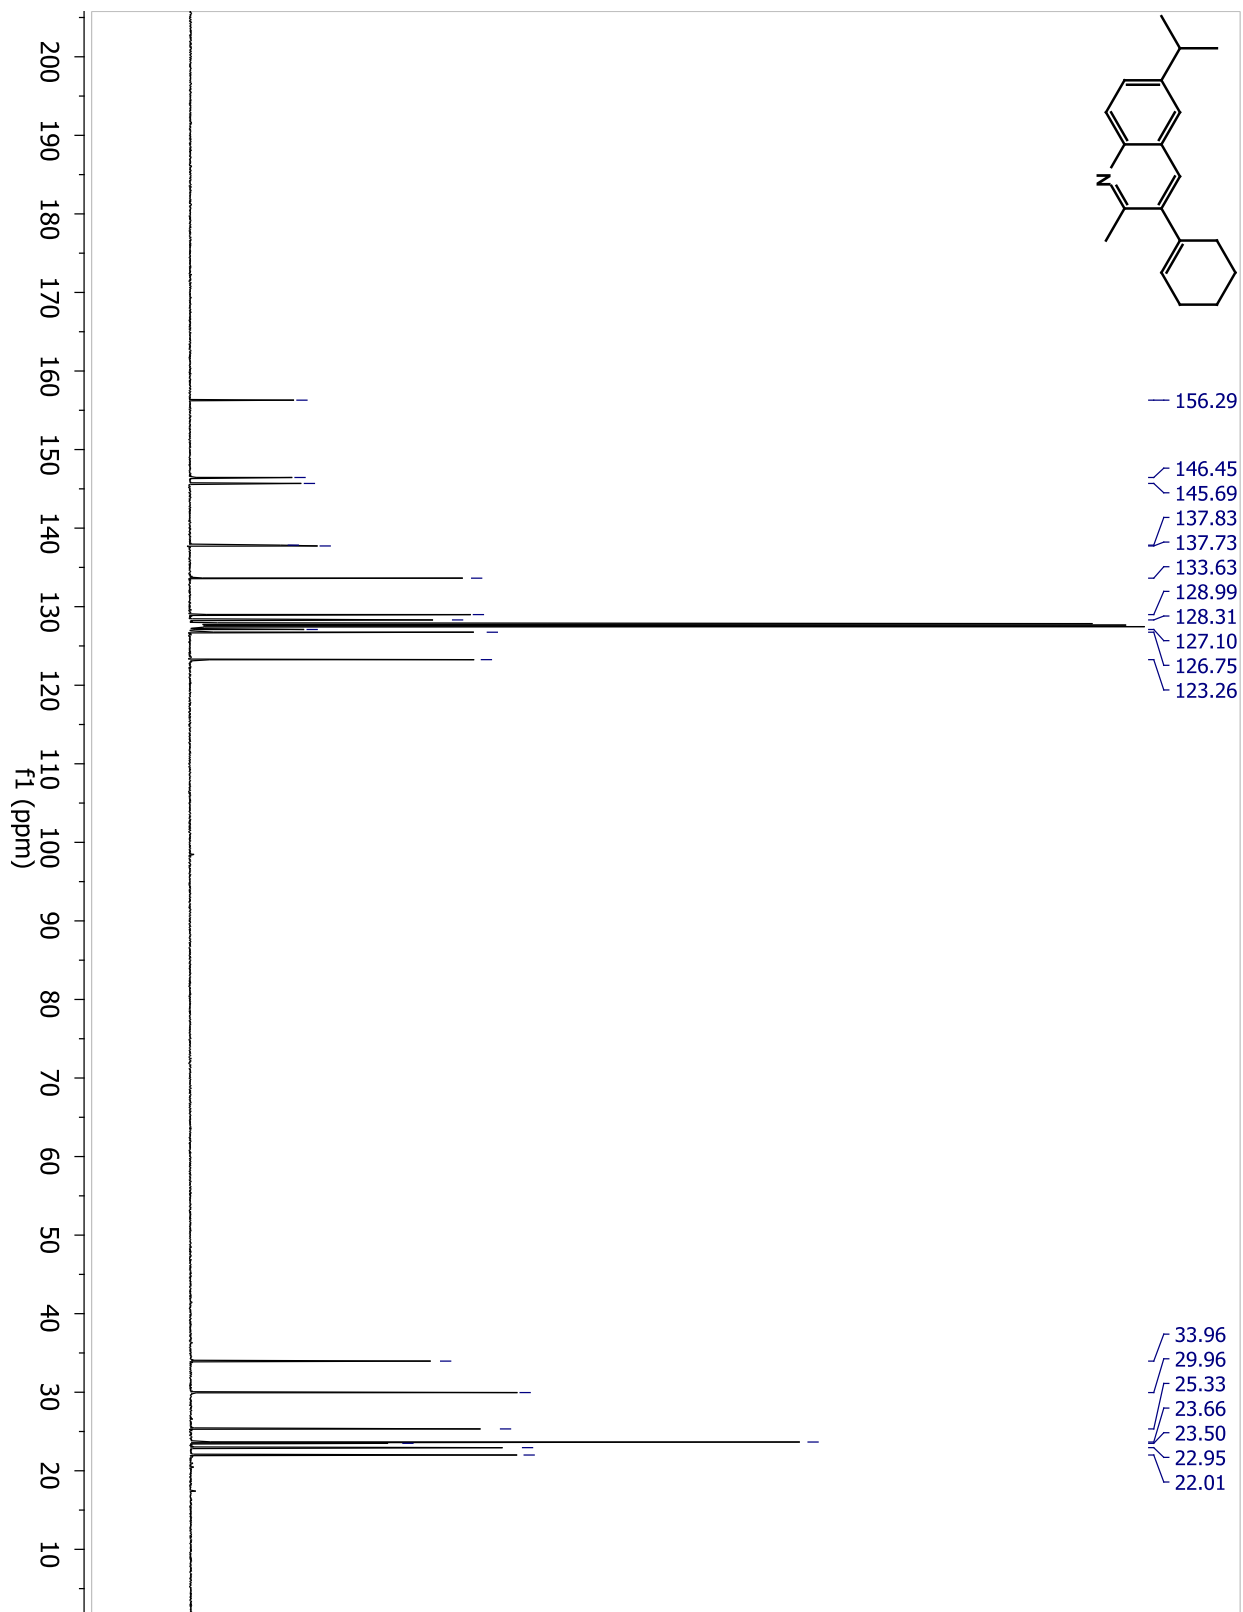

**Figure S54:**  $^{13}\text{C}$  NMR spectrum for compound 3-cyclohexenyl-6-isopropyl-2-methylquinoline.  
(TM-117, Quinoline 30)

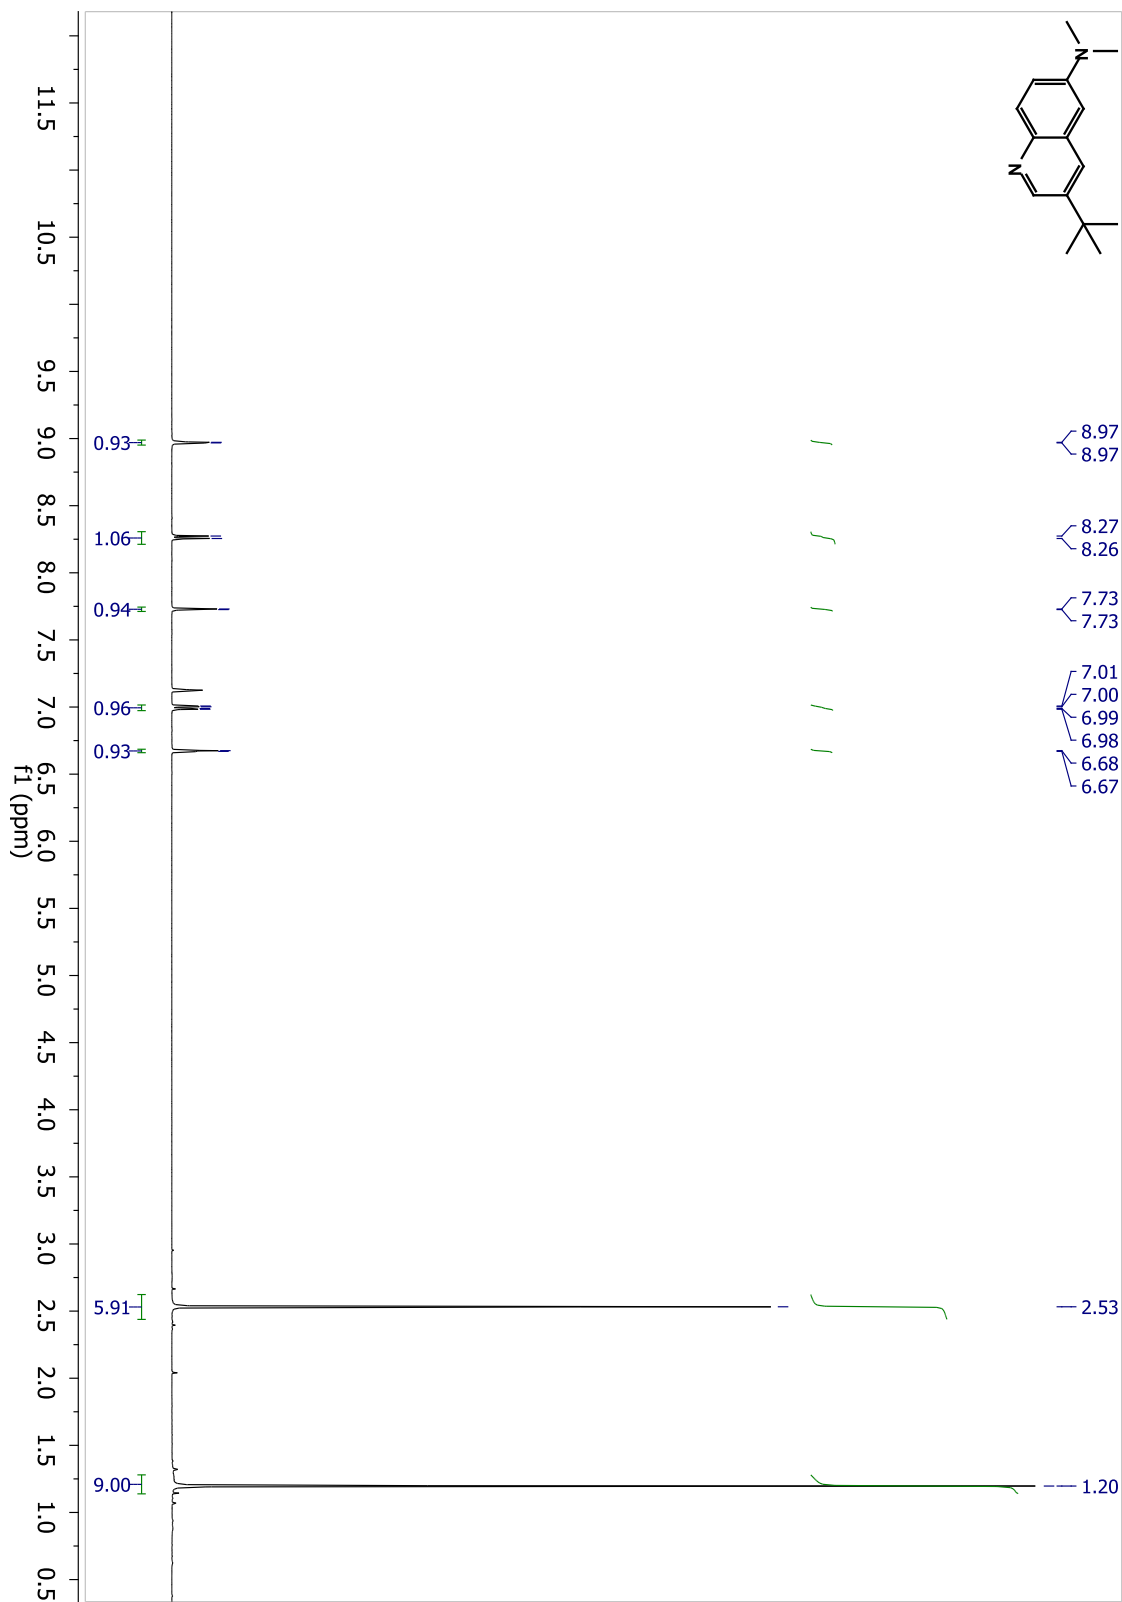

**Figure S55:** <sup>1</sup>H NMR spectrum for compound 3-*tert*-butyl-6-(*N,N*-dimethylamino)quinoline.  
(TM-081, Quinoline 31)

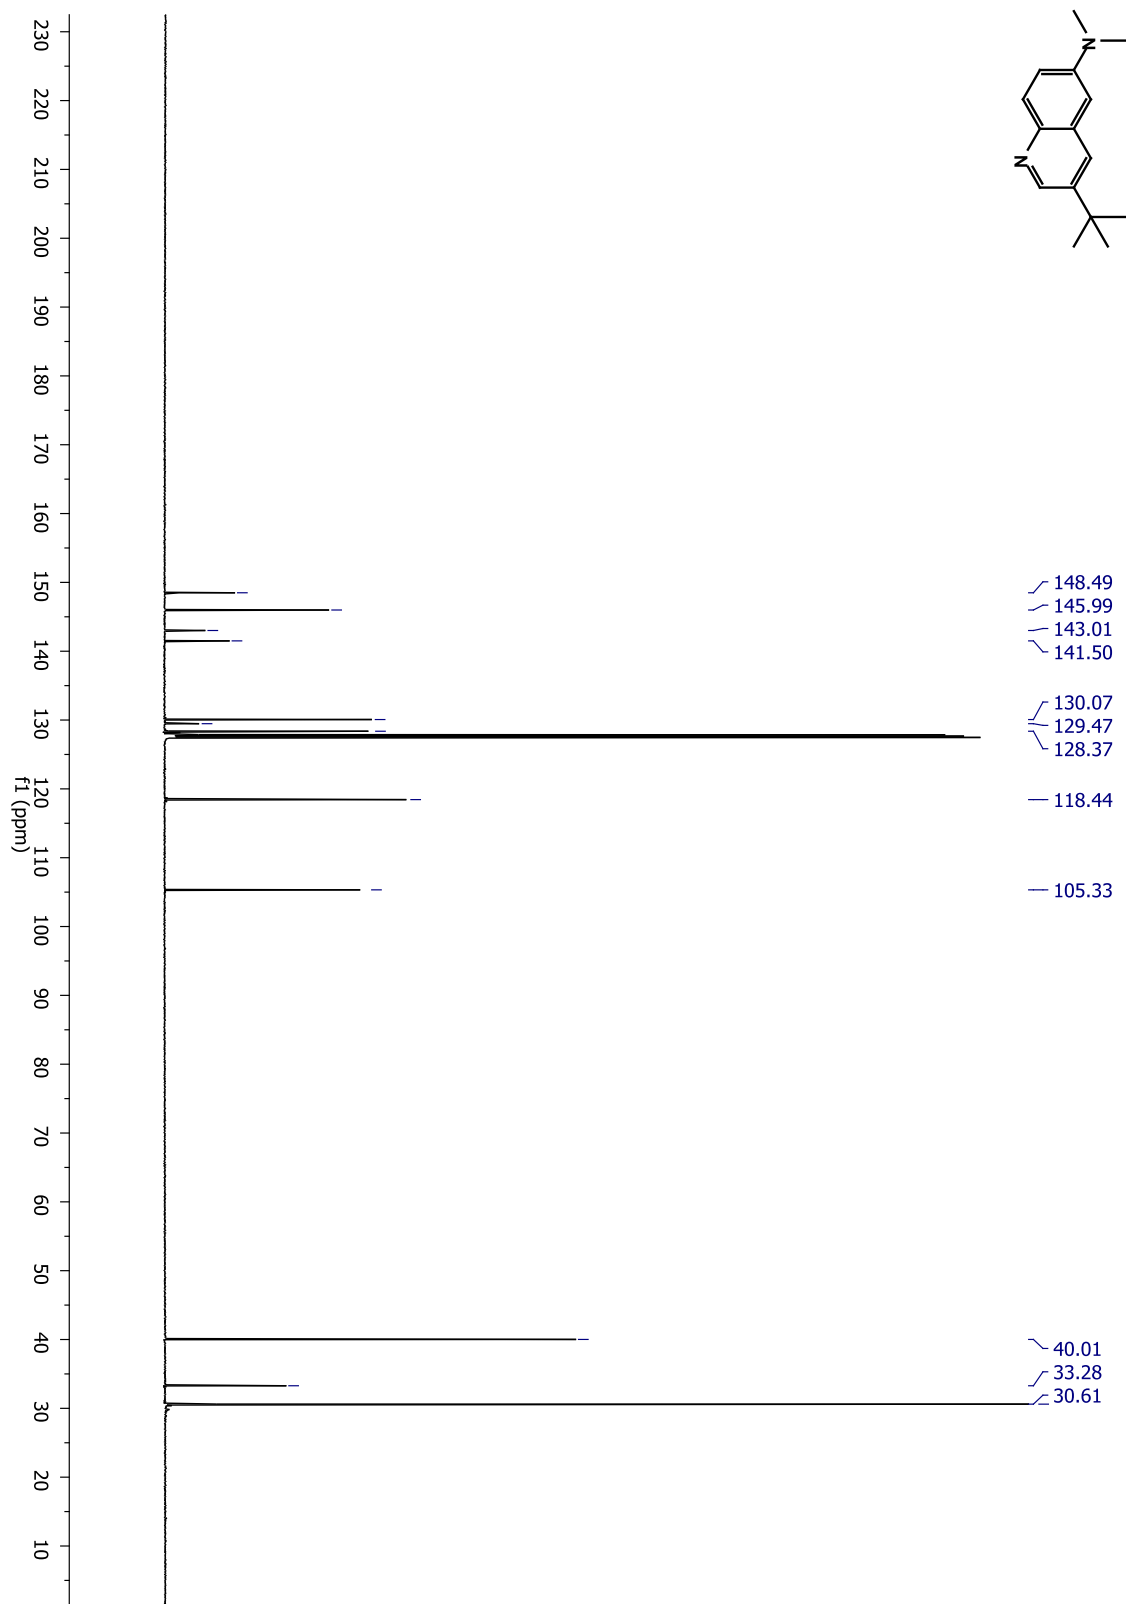

**Figure S56:**  $^{13}\text{C}$  NMR spectrum for compound 3-*tert*-butyl-6-(*N,N*-dimethylamino)quinoline.  
(TM-081, Quinoline 31)

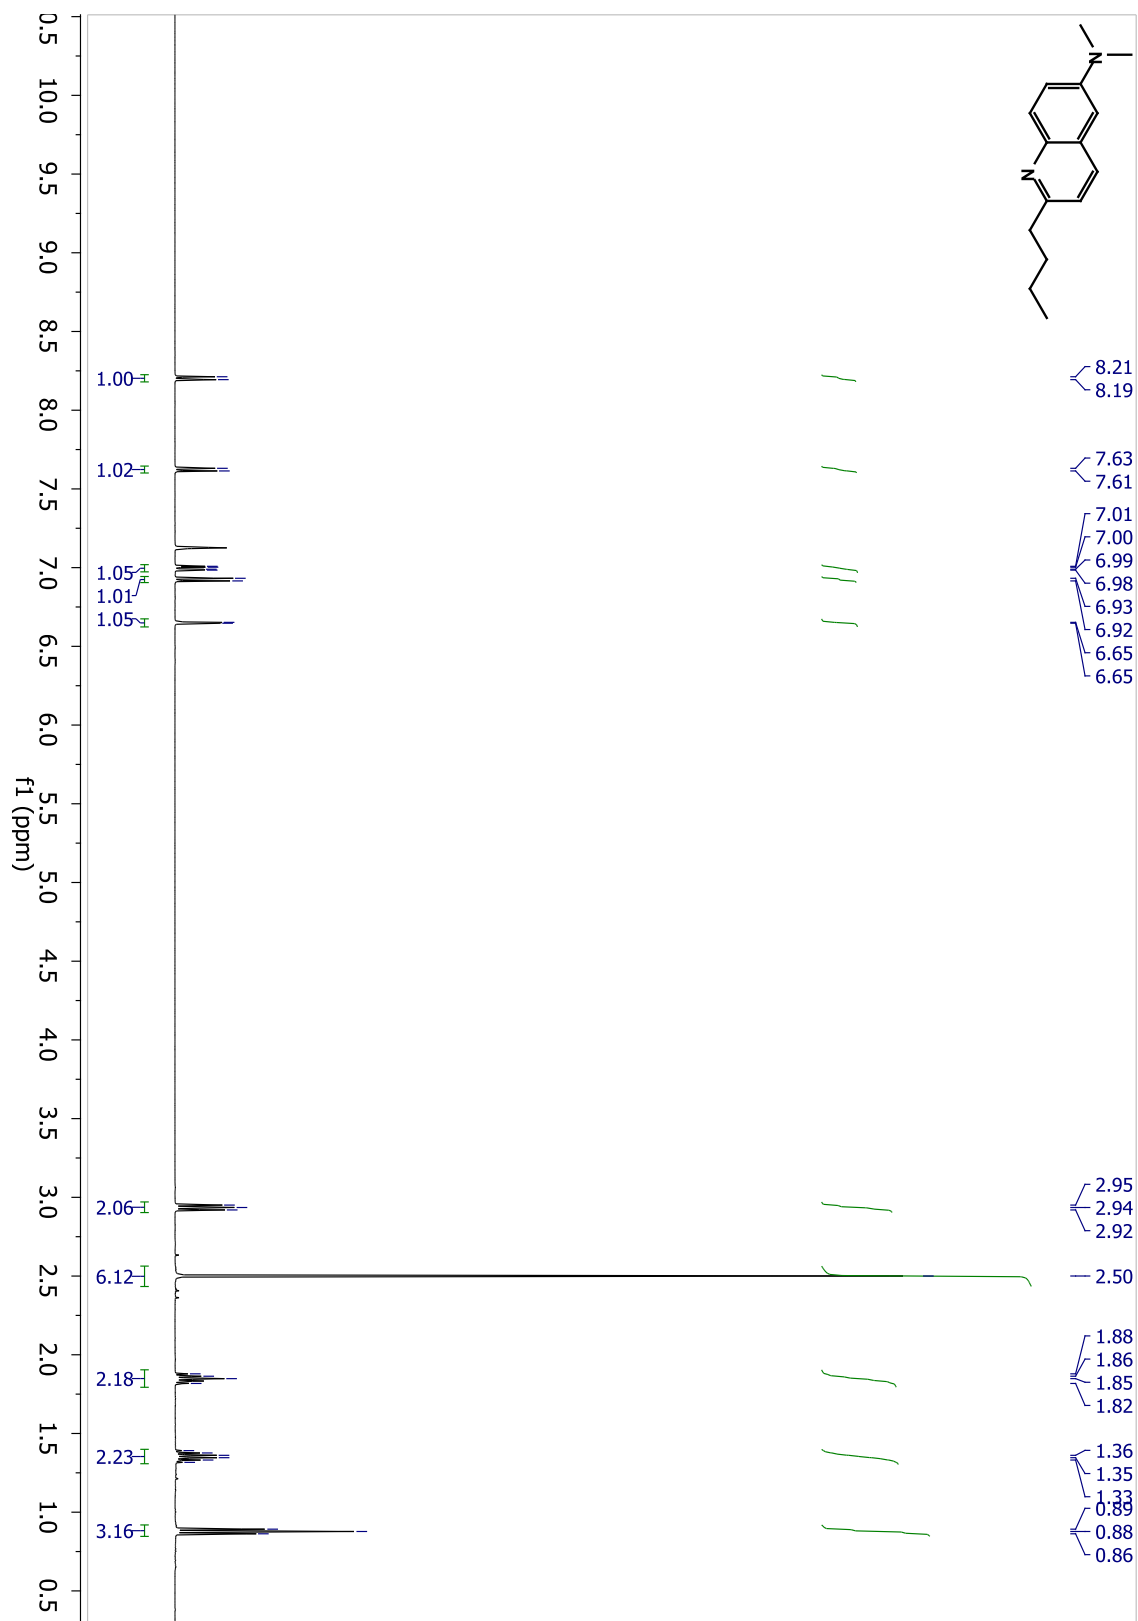

**Figure S57:** <sup>1</sup>H NMR spectrum for compound 2-butyl-6-(N,N-dimethylamino)quinoline.  
(TM-082, Quinoline 32)

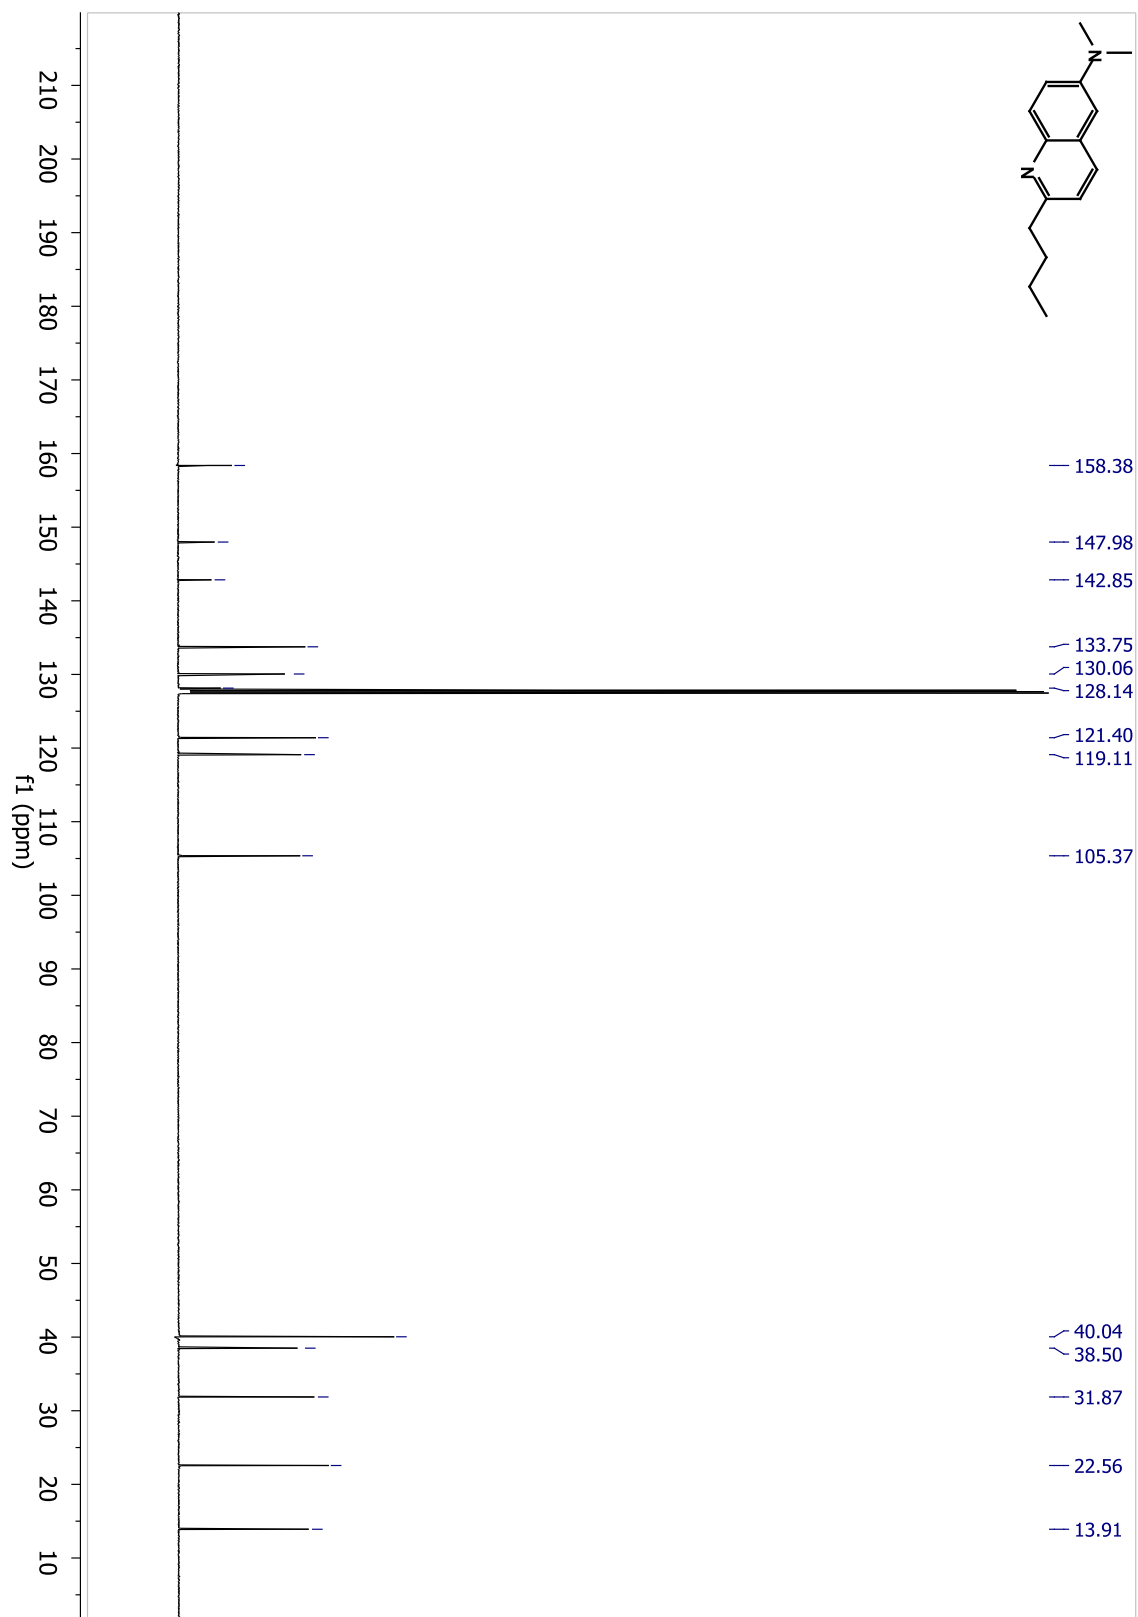

**Figure S58:**  $^{13}\text{C}$  NMR spectrum for compound 2-butyl-6-(N,N-dimethylamino)quinoline.  
(TM-082, Quinoline 32)

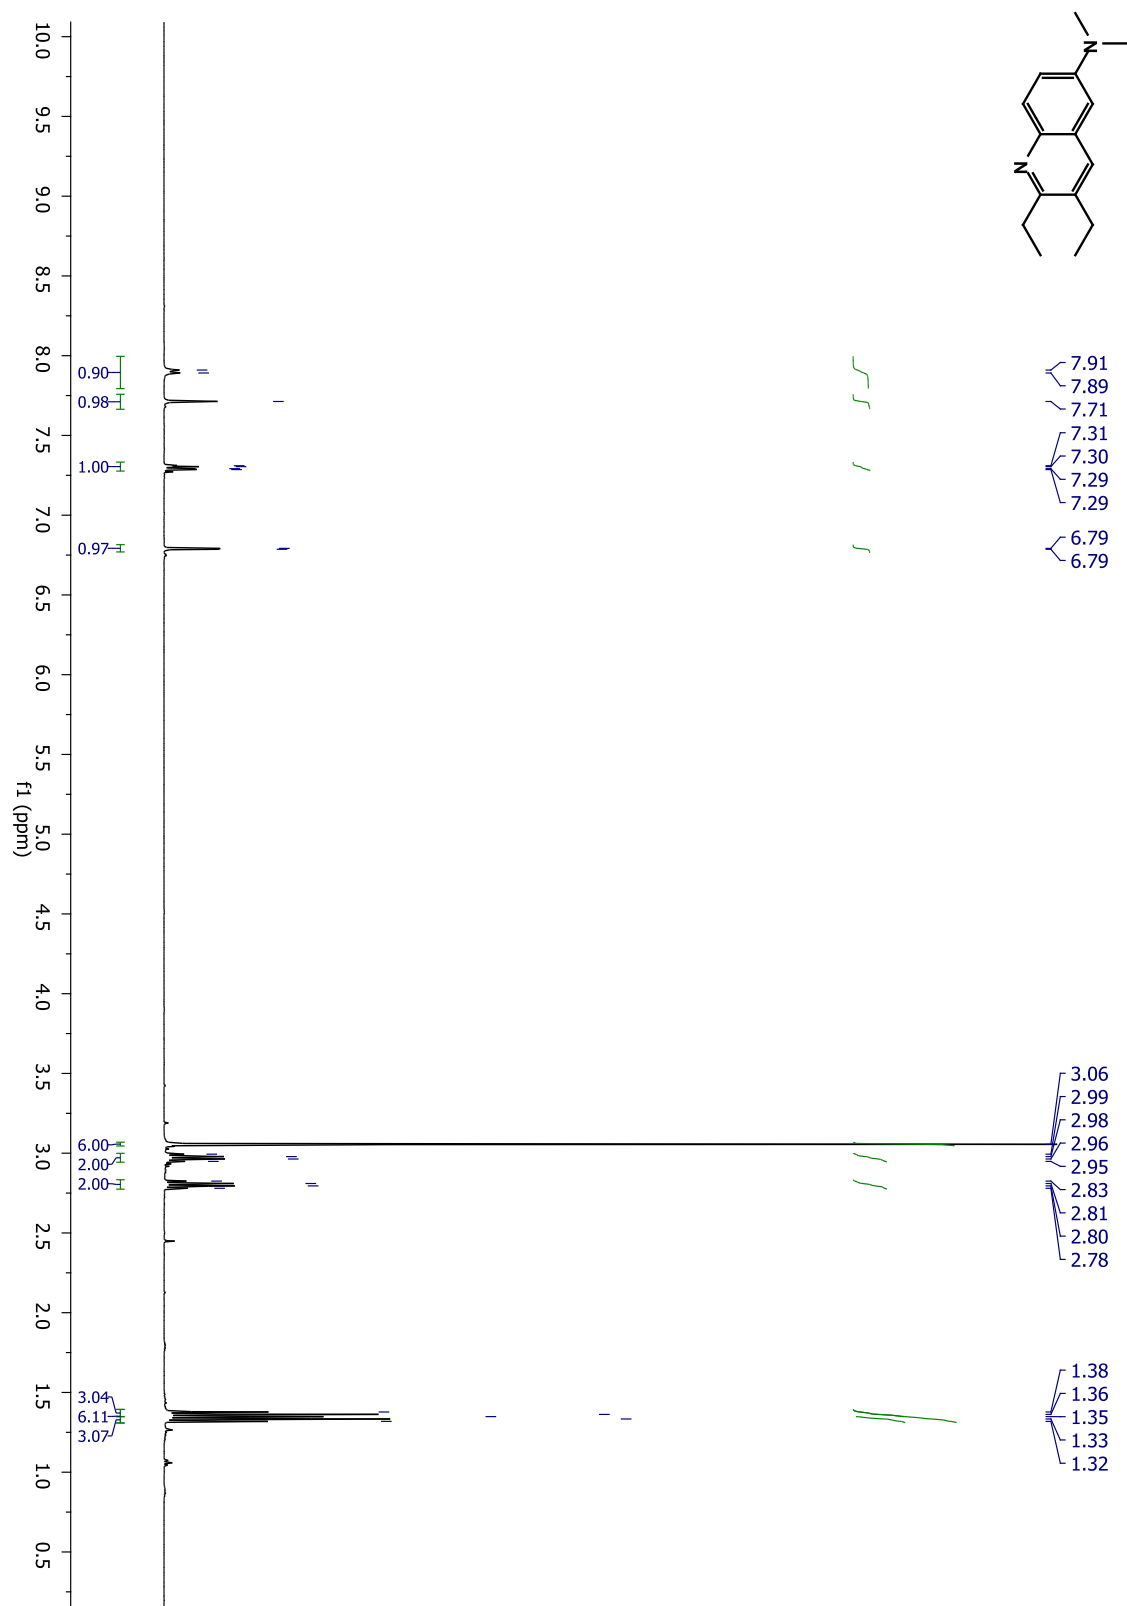

**Figure S59:** <sup>1</sup>H NMR spectrum for compound 2,3-diethyl-N,N-dimethylquinoline.  
(TM-090, Quinoline 33)

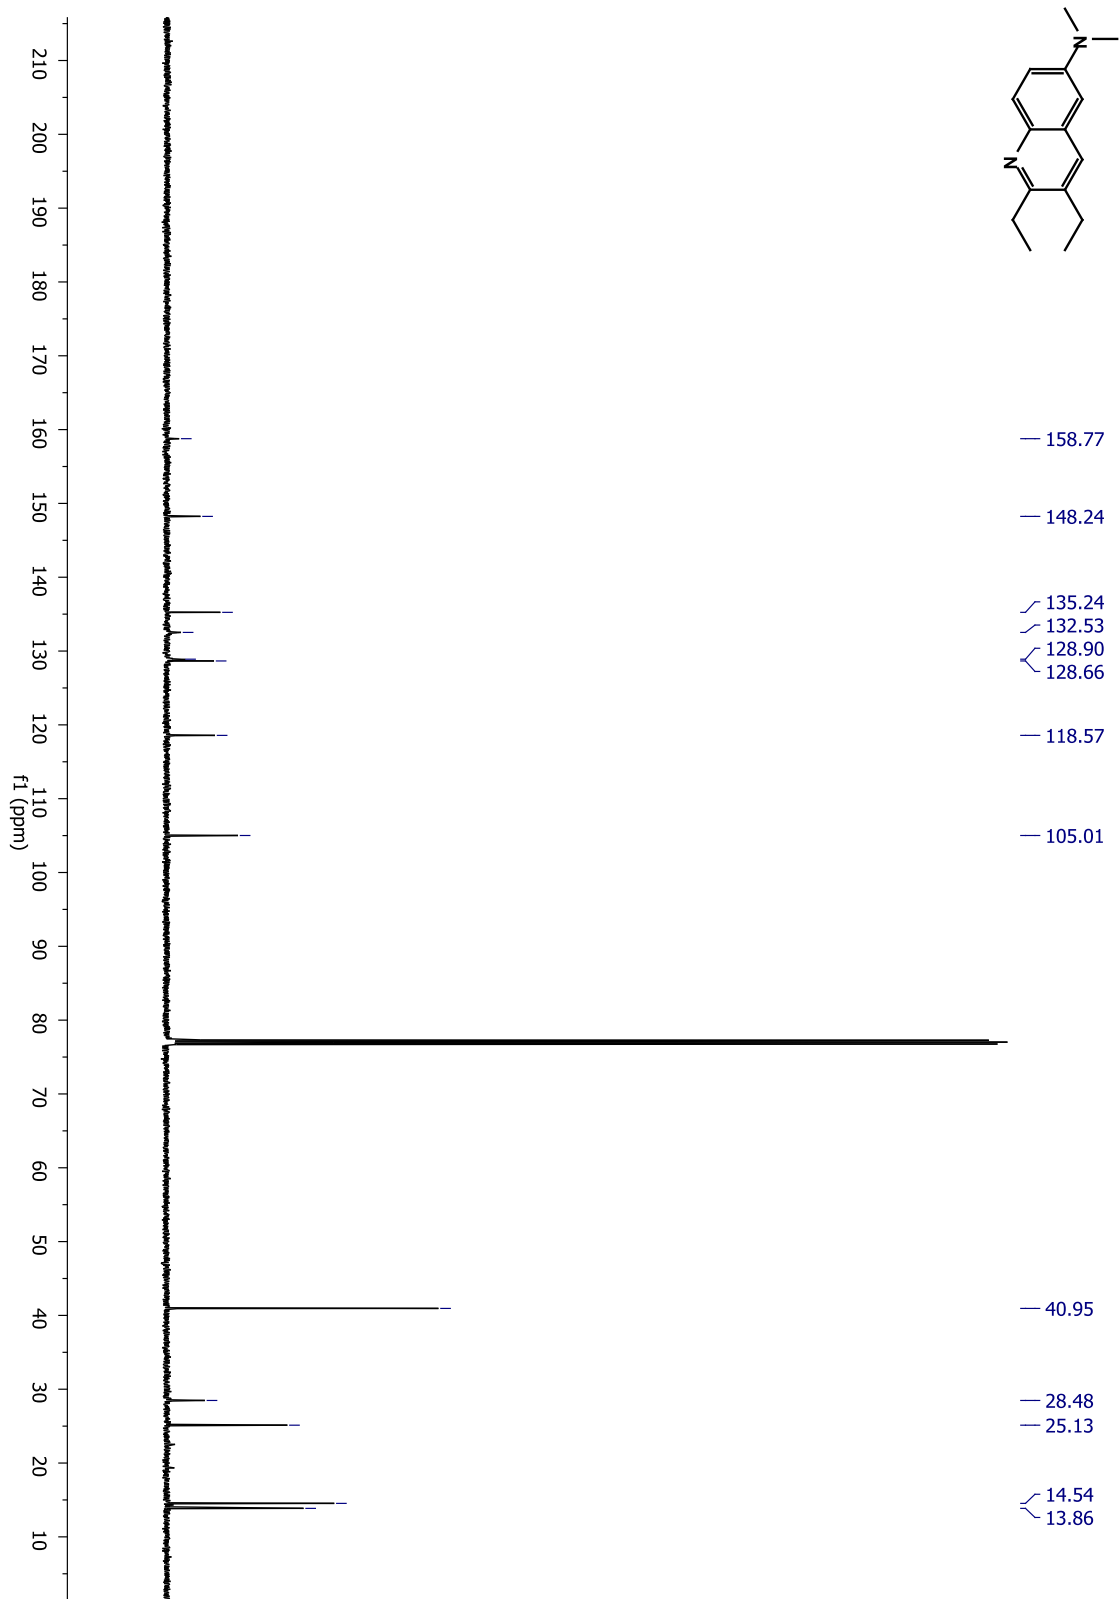

**Figure S60:**  $^{13}\text{C}$  NMR spectrum for compound 2,3-diethyl-N,N-dimethylquinoline.  
(TM-090, Quinoline 33)



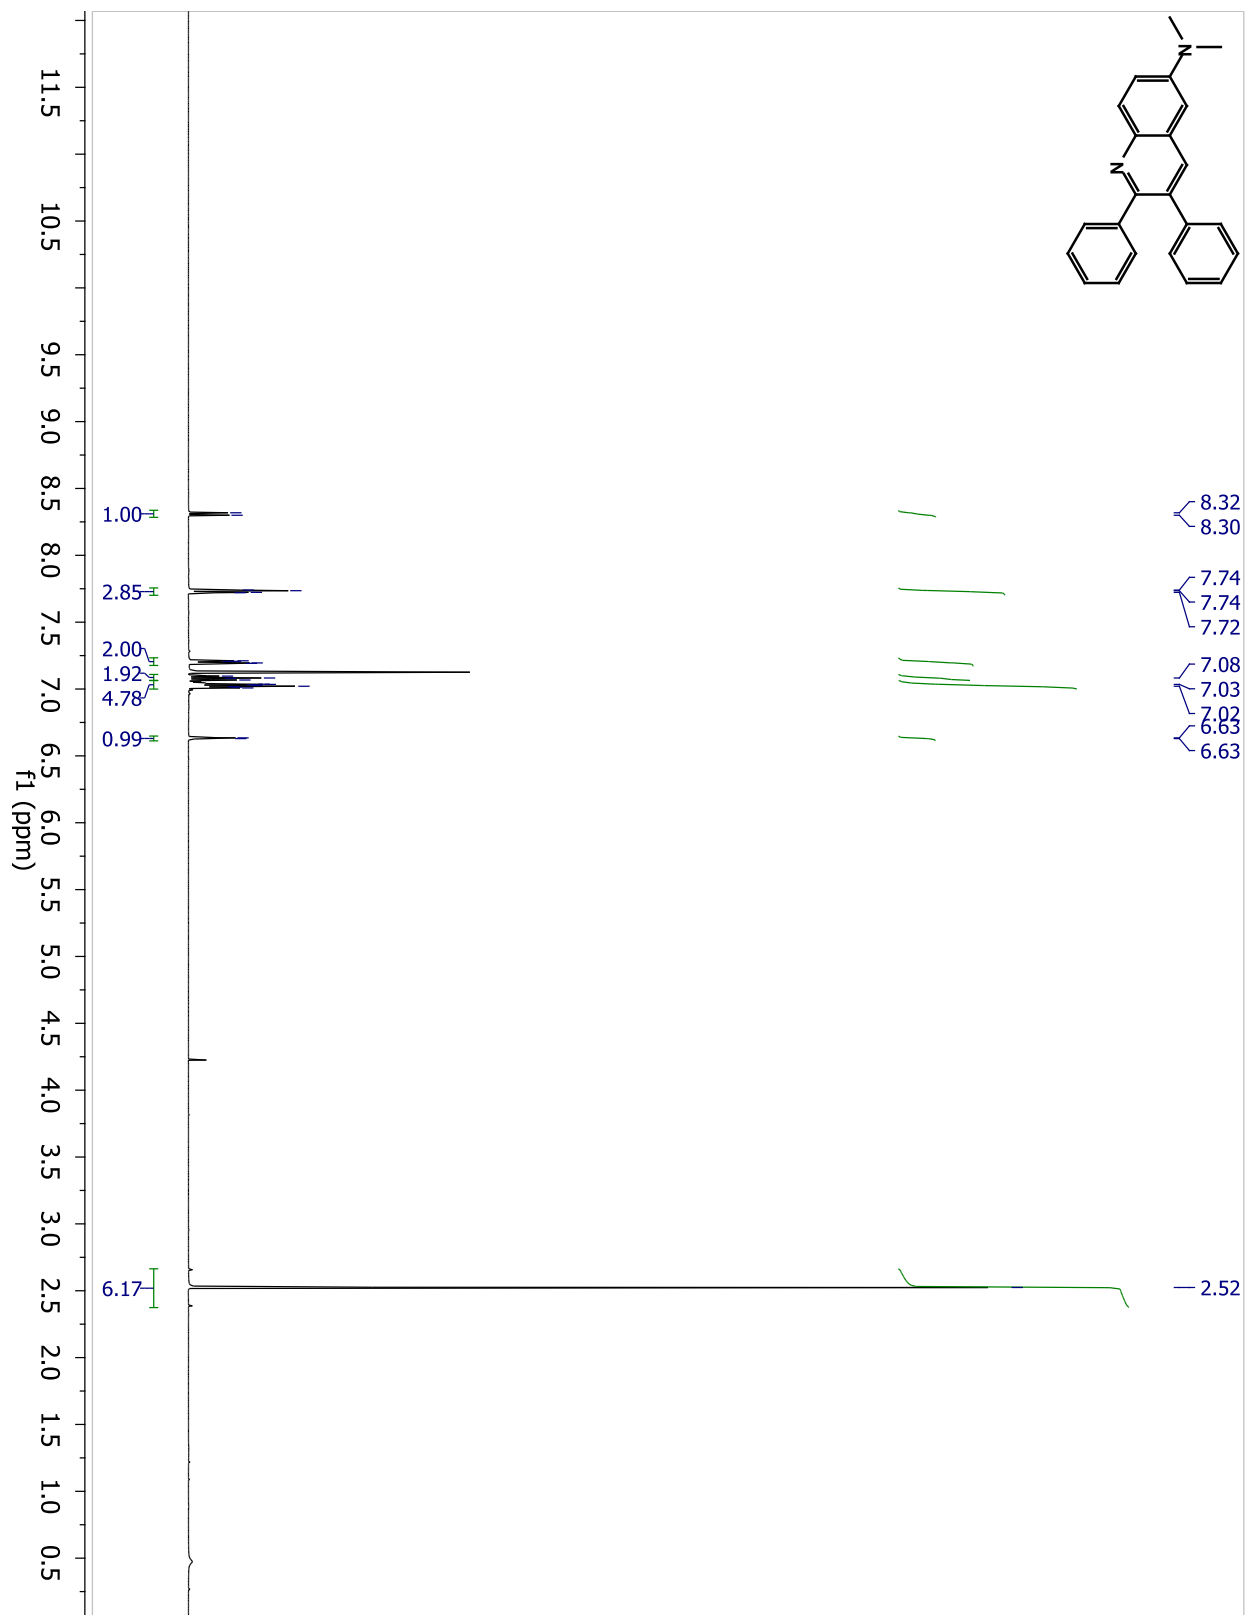

**Figure S61:**  $^1\text{H}$  NMR spectrum for compound 2,3-diphenyl-6-(N,N-dimethylamino)quinoline.  
(TM-124, Quinoline 35)

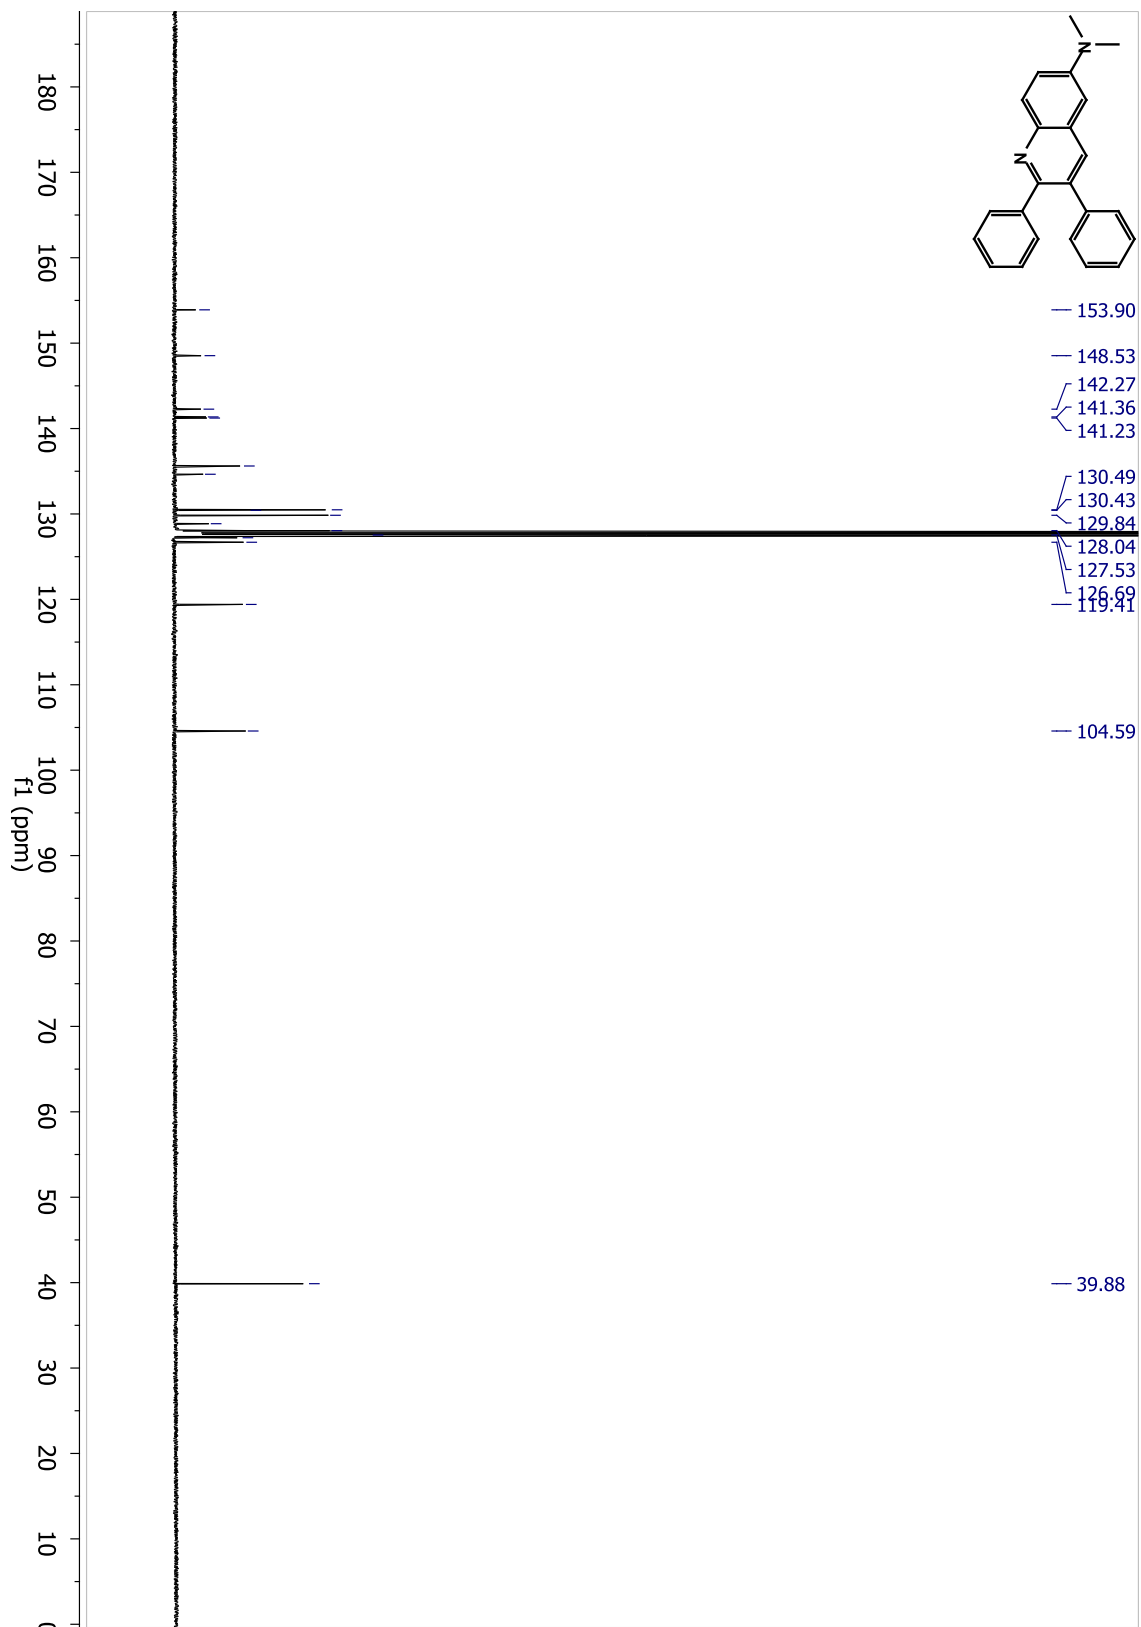

**Figure S62:**  $^{13}\text{C}$  NMR spectrum for compound 2,3-diphenyl-6-(N,N-dimethylamino)quinoline.  
(TM-124, Quinoline 35)

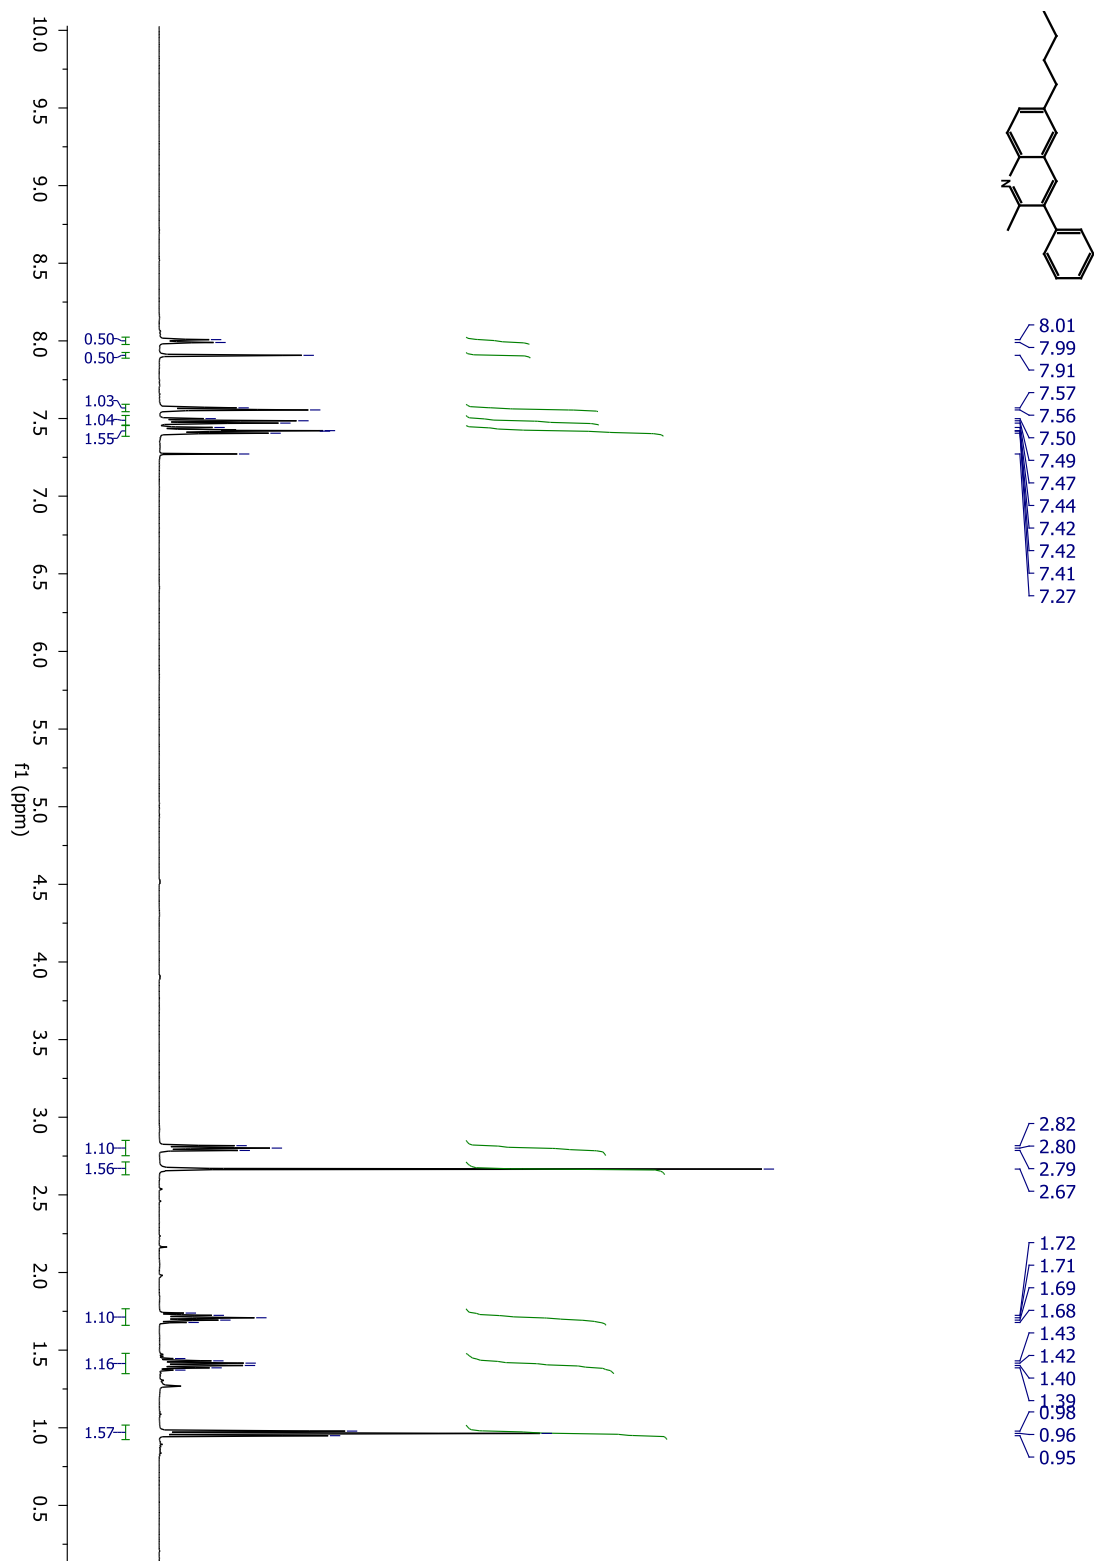

**Figure S63:**  $^1\text{H}$  NMR spectrum for compound 6-butyl-2-methyl-3-phenylquinoline.  
(TM-114, Quinoline 36)

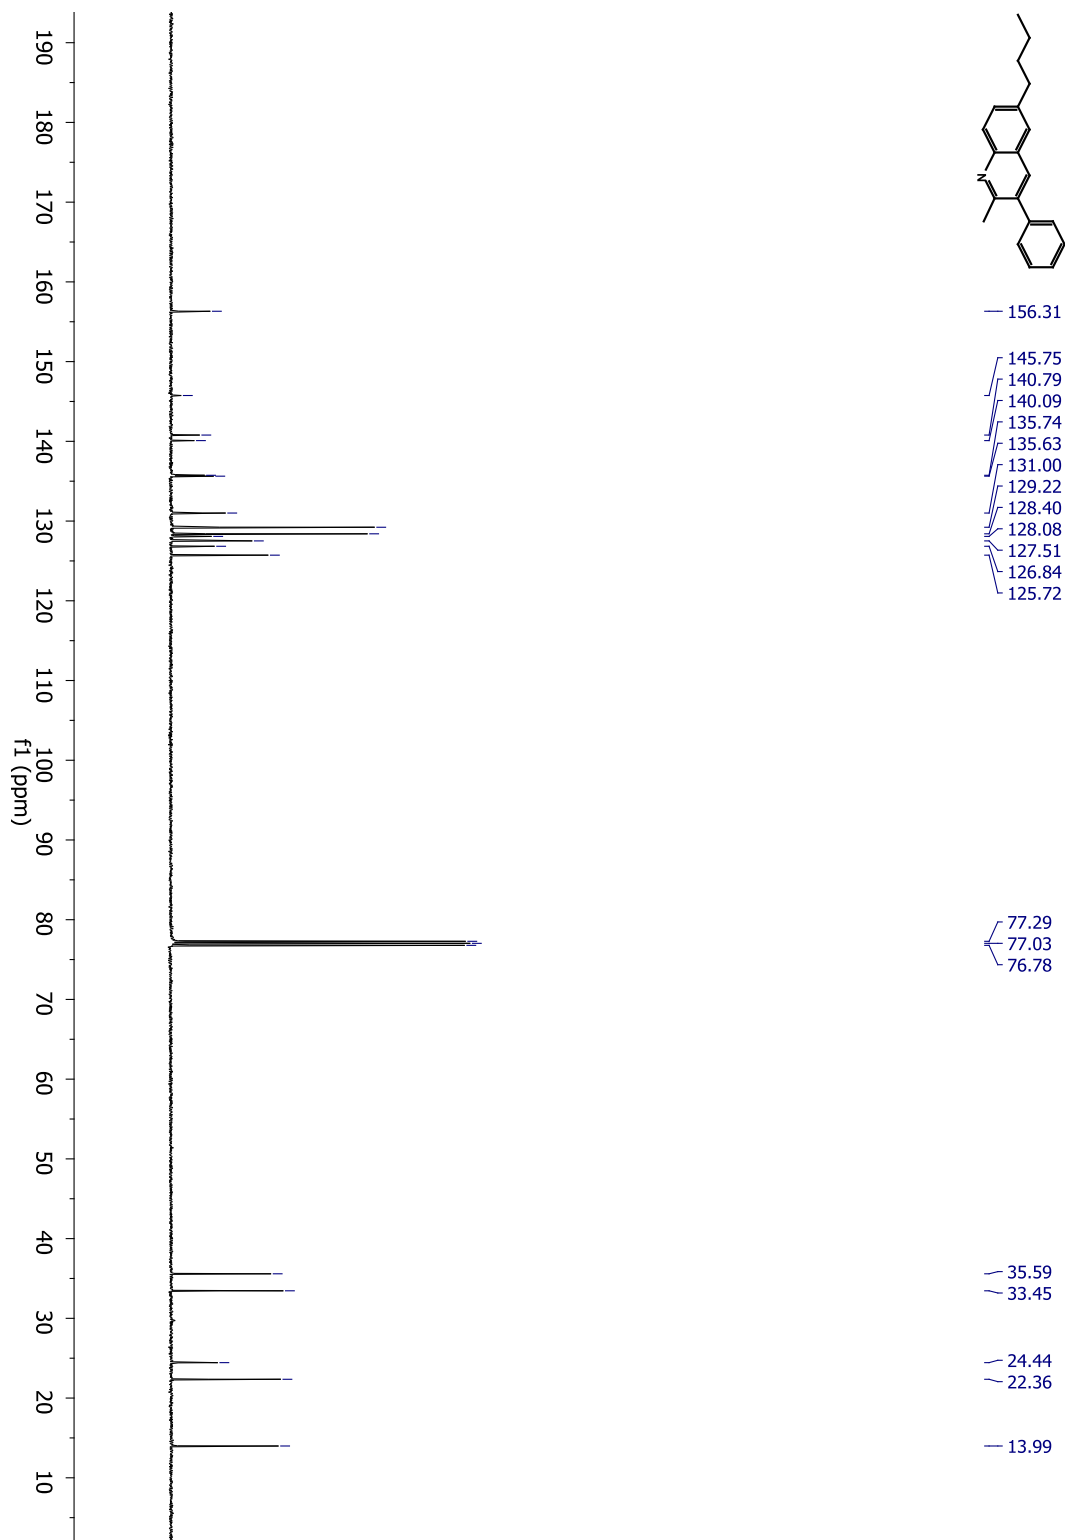

**Figure S64:**  $^{13}\text{C}$  NMR spectrum for compound 6-butyl-2-methyl-3-phenylquinoline.  
(TM-114, Quinoline 36)

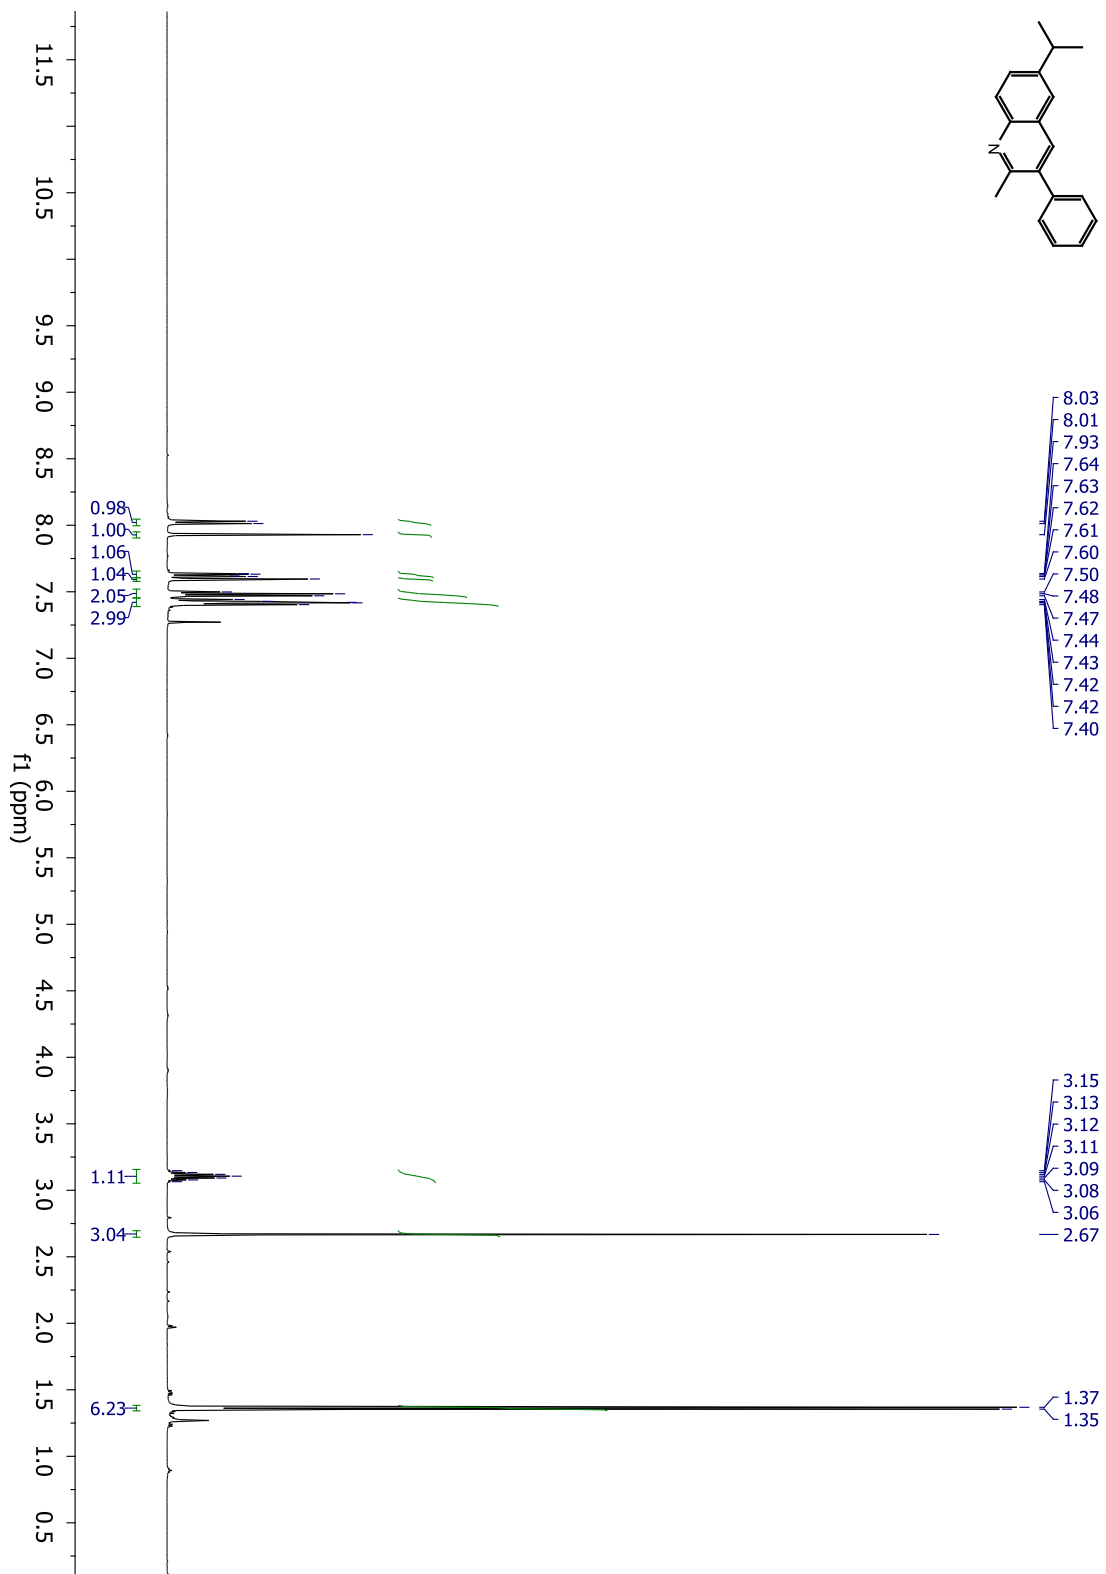

**Figure S65:** <sup>1</sup>H NMR spectrum for compound 6-isopropyl-2-methyl-3-phenylquinoline.  
(TM-119, Quinoline 37)

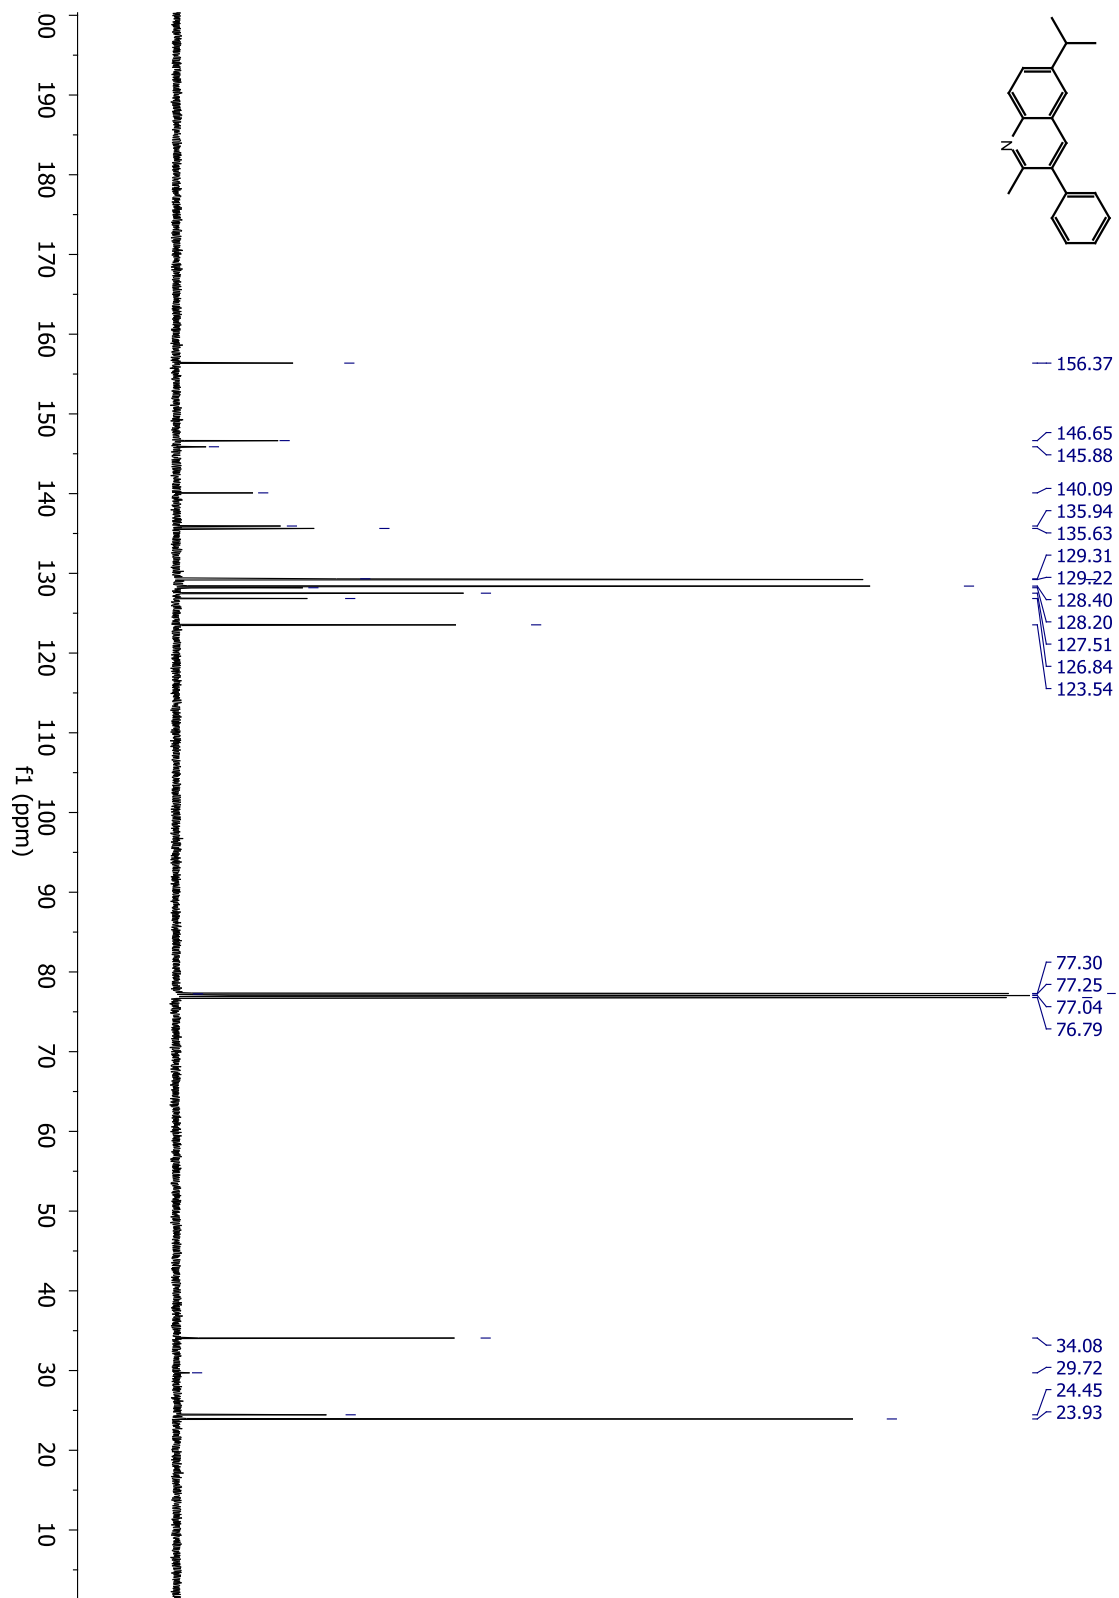

**Figure S66:**  $^{13}\text{C}$  NMR spectrum for compound 6-isopropyl-2-methyl-3-phenylquinoline.  
(TM-119, Quinoline 37)

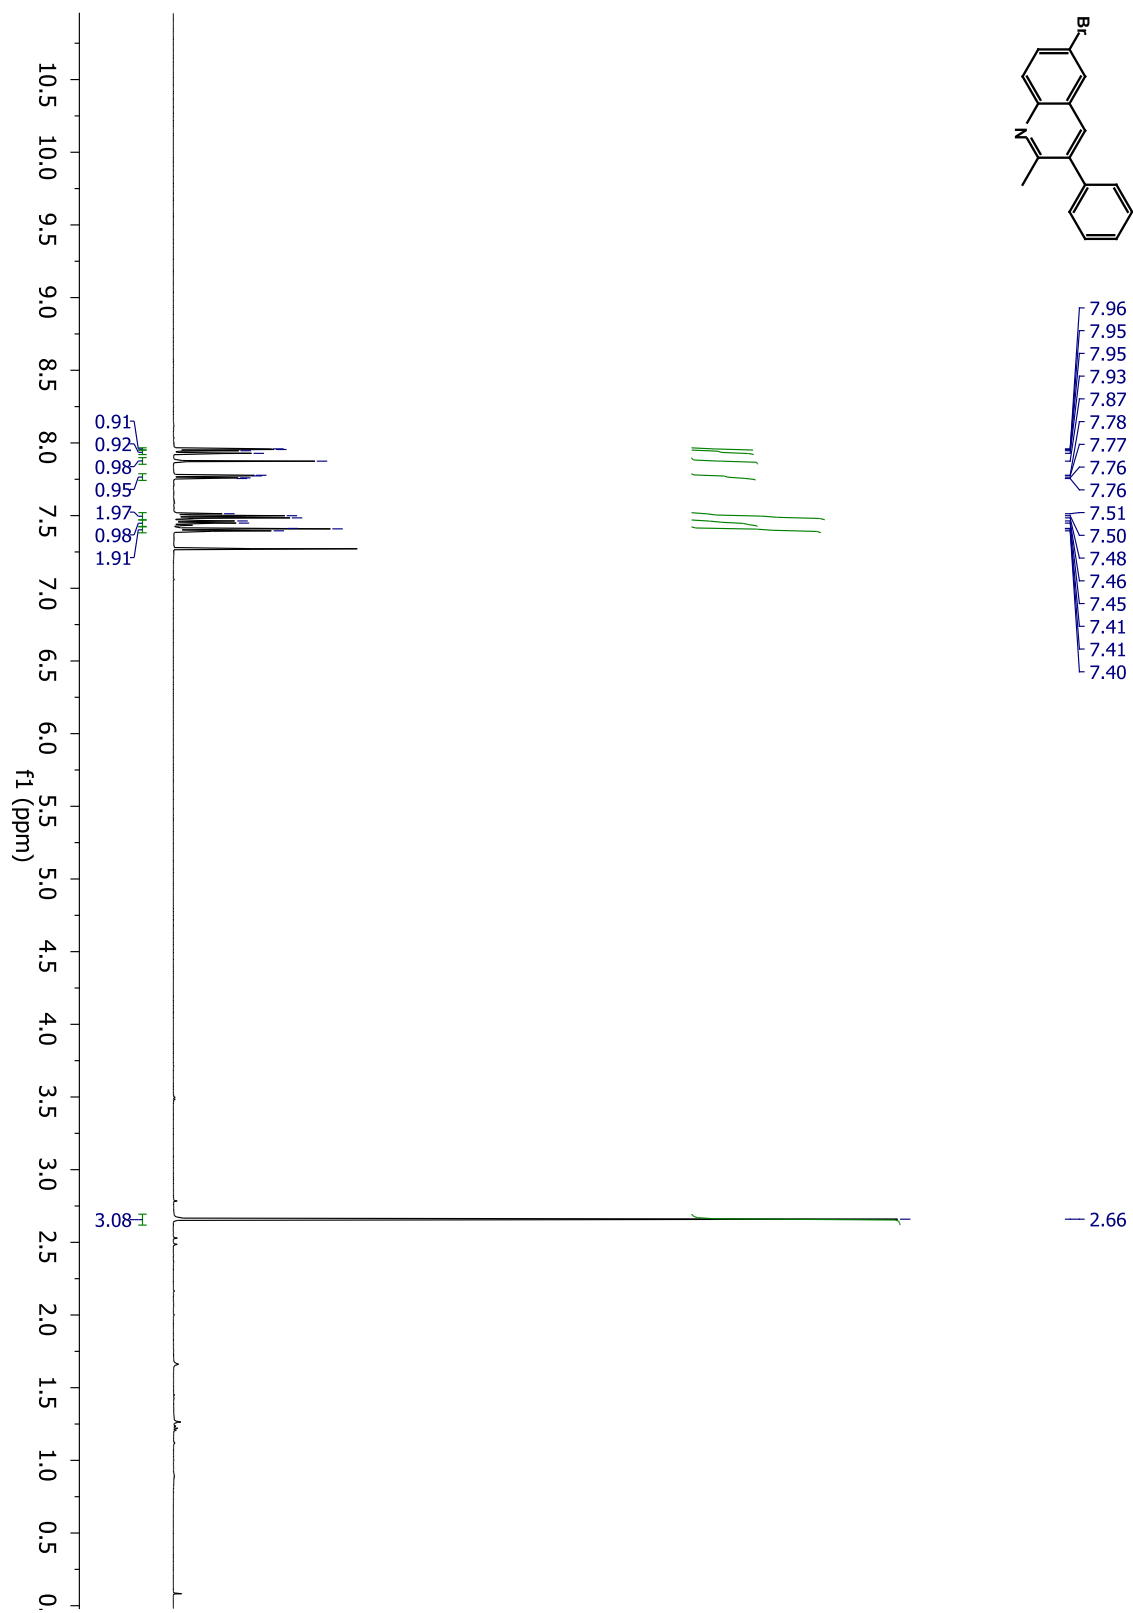

**Figure S67:**  $^1\text{H}$  NMR spectrum for compound 6-bromo-2-methyl-3-phenylquinoline.  
(TM-120, Quinoline 38)

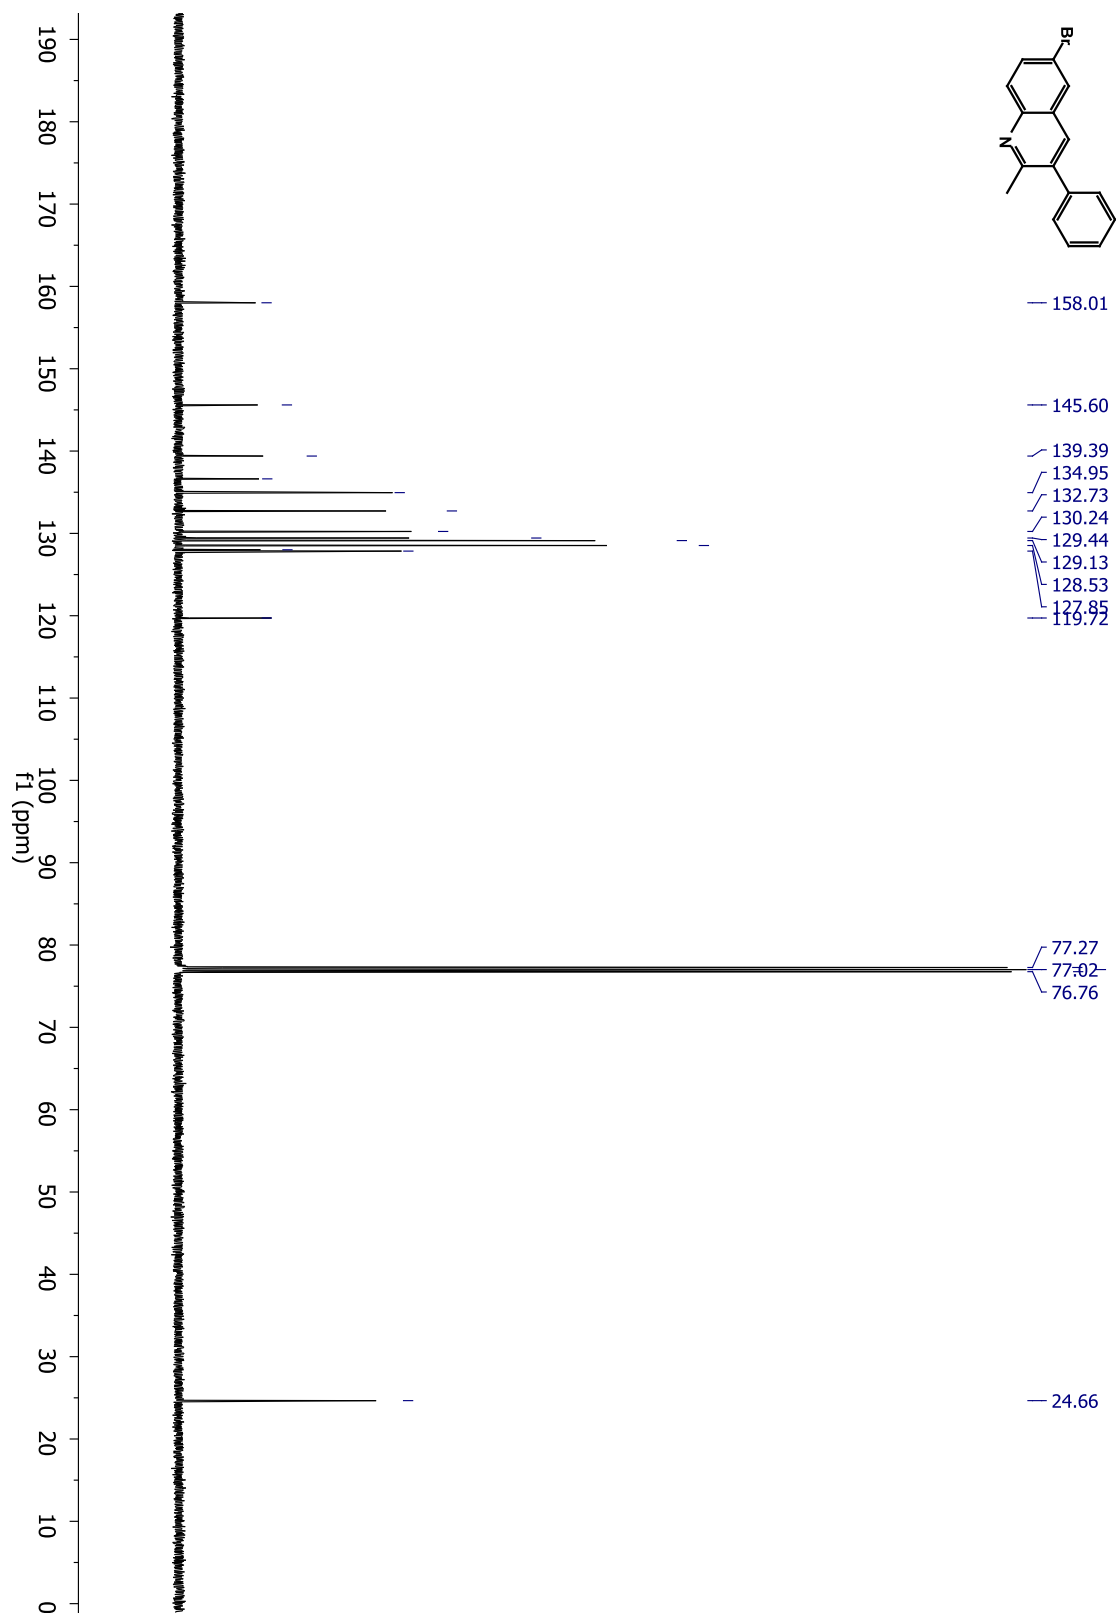



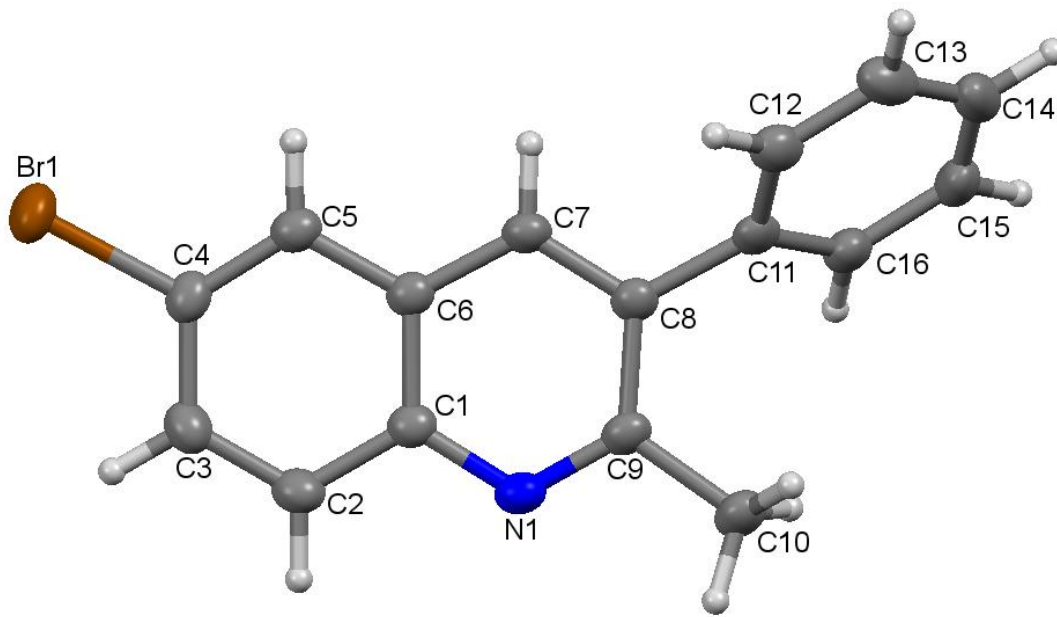

**Figure 69:** Crystal structure of 6-bromo-3-phenyl-2-methylquinoline.
